# Supplementary material for: Exploring the catalytic role of the guanidine TBD in carboxylative cyclizations
Source: Royal Society of Chemistry journal article supplement (doi:10.1039/d2ob01012g), 2022-01-01
Supplement: d2ob01012g1.pdf [file d2ob01012g1.pdf]

## Electronic Supplementary Information

### Exploring the Catalytic Role of TBD in Carboxylative Cyclizations

Kaitlin A. Isfeld, Charles Killeen, Dawson J. Konowalchuk, and Rebecca L. Davis\*

Supporting Information

|                                                                                |     |
|--------------------------------------------------------------------------------|-----|
| <b>A.</b> General Information                                                  | S2  |
| <b>B.</b> Synthetic Procedures                                                 | S3  |
| <b>C.</b> Standard Curve for the Response Factor of <b>1</b>                   | S5  |
| <b>D.</b> Kinetics Data for the Carboxylative Cyclization Reaction of <b>1</b> | S6  |
| <b>E.</b> Computed Thermal Stability of the TBD:CO <sub>2</sub> Adduct         | S10 |
| <b>F.</b> Non-covalent Interactions of <b>Int3</b>                             | S11 |
| <b>G.</b> Computed Catalytic Cycles                                            | S12 |
| <b>H.</b> Computational Structures, Energies and Coordinates                   | S15 |
| <b>I.</b> References                                                           | S68 |

## A. General Information

### Materials.

All reagents and solvents were purchased from Sigma Aldrich and Alfa Aesar and used as received, without further purification unless otherwise noted.

### Kinetics study details and methods.

For the collection of the kinetics data, the TBD catalyzed carboxylative cyclization reaction of **1** was performed in an experimental apparatus designed to deliver constant CO<sub>2</sub> pressure. The <sup>1</sup>H and <sup>13</sup>C NMR spectra of the product (**2**) obtained in this experiment are consistent with those reported in the literature.<sup>1</sup> To monitor the progress of the reaction a chromatographic method was developed using supercritical fluid chromatography-ultra-high-pressure liquid chromatography (SFC-UHPLC). Separation was performed on a 1260 Infinity II HPLC (Agilent, Santa Clara, USA) using a 150 x 4.6 mm Zorbax RX-SIL column (Agilent, Santa Clara, USA). Samples were eluted using a gradient elution method with CO<sub>2</sub> and iPrOH and analyzed for absorbance at 254 nm using a diode array detector (DAD). The mobile phase was pumped for 10 minutes with 95:5 CO<sub>2</sub>:iPrOH, and then for 20 minutes with 85:15 CO<sub>2</sub>:iPrOH at 0.5 mL/min. HPLC-grade isopropanol was purchased from Sigma-Aldrich (St. Louis, USA) and used as obtained. Naphthalene was used as an internal standard and was recrystallized from ethanol prior to use. A standard curve was created to ensure the response factor of **1** was linear within experimentally relevant concentrations (Figure S1). From the ratio of integrated peak areas of naphthalene and **1**, and the known starting concentration of **1**, the concentration of **1** was calculated for all samples. Kinetics data for the reaction performed in diglyme was averaged based on the results of 2 runs for the experiments at 10 and 20 mol % catalyst loading and 3 runs for the experiments at 40 mol % catalyst loading. Kinetics data was also collected for a single run of the reaction performed in the literature reaction solvent (MeCN) at 40 mol % catalyst loading (Table S8 and Figure S2). In this experiment, similar conversion and rates were observed compared to the reaction performed with the same catalyst loading in diglyme.

### Computational details and methods.

All calculations were conducted using Gaussian 09 software.<sup>2</sup> Solvation was included in all calculations using the integral equation formalism variant of the polarizable continuum model (IEFPCM) with acetonitrile as the solvent.<sup>3</sup> All structures were optimized at the M06-2X/def2TZVP level.<sup>4,5</sup> Vibrational analysis was performed at 373.15 K on all optimized geometries, ensuring intermediates and transition states contained zero and one imaginary frequencies, respectively. To estimate the basis set superposition error, counterpoise corrections were performed on the IEFPCM-M06-2X/def2TZVP optimized geometries. All structures were visualized using CYLview 1.0,<sup>6</sup> with the exception of the NCI plot (Figure S3), which was calculated using NCIPLOT and visualized using VMD.<sup>7,8</sup>

## B. Synthetic Procedures

### Procedure for the synthesis of *o*-nitro-*gem*-dibromovinylbenzene.

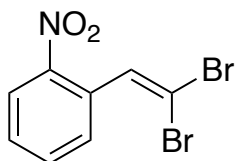

To a solution of *ortho*-nitrobenzaldehyde (1.51 g, 10 mmol) and carbon tetrabromide (4.98 g, 15 mmol) in 50 mL DCM, is slowly added a solution of triphenylphosphine (7.87 g, 30 mmol) in 40 mL DCM at 0 °C. The mixture is allowed to stir at 0 °C for 30 minutes and then at room temperature for 60 minutes. The mixture is filtered through a silica plug which is washed with a small portion of DCM and then concentrated *in vacuo*. The crude residue is used without further purification. The <sup>1</sup>H and <sup>13</sup>C NMR spectra are consistent with those reported in the literature.<sup>9</sup>

### Procedure for the synthesis of *o*-*gem*-dibromovinylaniline.

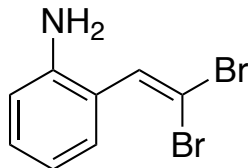

The crude residue from the synthesis of *o*-nitro-*gem*-dibromovinylbenzene is dissolved in a solution of 21 mL anhydrous ethanol and 3.5 mL glacial acetic acid. To the solution is added iron powder (4.0 g, 70 mmol) and iron (III) chloride (0.25 g, 1.5 mmol), and the mixture is refluxed. The progress of the reaction is monitored by TLC (7:1 hexanes:EtOAc). Upon complete conversion of starting material the reaction is filtered through a silica plug which is washed with a small amount of methanol and concentrated *in vacuo*. The crude residue is purified by flash column chromatography (7:1 hexanes:EtOAc) to give the product (1.76 g, 6.35 mmol) as a brown oil in a 63.5% yield over two steps. The <sup>1</sup>H and <sup>13</sup>C NMR spectra are consistent with those reported in the literature.<sup>9</sup>

### Procedure for the synthesis of 2-phenylethynylindole (1).

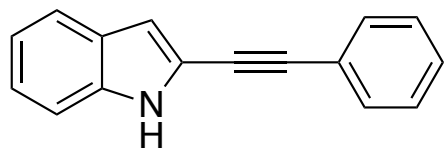

To a 100 mL round-bottom flask is added 10 % w/w Pd/C (0.358 g, 0.32 mmol), triphenylphosphine (0.2g, 0.76 mmol), and a stir bar. The flask is equipped with a septum and is purged with argon for 10 minutes. To a second 100 mL pear-shaped flask is added *o*-*gem*-dibromovinylaniline (1.76 g, 6.36 mmol) and copper (I) iodide (35 mg, 0.18 mmol), and a stir bar. The flask is equipped with a septum and purged with argon for 10 minutes. After purging, a solution of phenylacetylene (1.04 mL, 9.4 mmol) and diisopropylamine (2.21 mL, 15.6 mmol) in 60 mL dry toluene is added to the flask containing vinylaniline and cuprous iodide via syringe. This mixture is stirred until homogeneity is obtained, and then cannulated to the first flask containing Pd/C and triphenylphosphine. The resulting mixture is heated at 100 °C for 2 hours. The mixture is then diluted with 100 mL Et<sub>2</sub>O, filtered, washed with 70 mL H<sub>2</sub>O and 50 mL brine, and dried with anhydrous MgSO<sub>4</sub>. The solvent is concentrated *in vacuo* and the crude residue is purified by flash column chromatography with gradient elution (19:1 to 9:1 hexanes:EtOAc) affording the product

2-phenylethynylindole (0.963g, 4.44 mmol) as a pale-yellow solid in a 67.0% yield. The  $^1\text{H}$  and  $^{13}\text{C}$  NMR spectra are consistent with those reported in the literature.<sup>10</sup>

**Procedure for the synthesis of 1-methyl-2-phenylethynylindole (1a).**

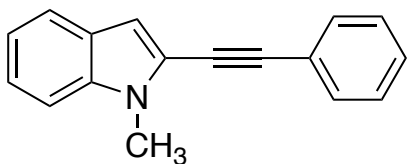

To a solution of 2-phenylethynylindole (14.5 mg, 0.067 mmol) in 1 mL dry DMF is added 60% w/w NaH in oil (6.0 mg, 0.15 mmol) with stirring. The solution rapidly turns from a straw-yellow colour to a deep red. Upon cessation of gas evolution, methyl iodide (5  $\mu\text{L}$ , 0.080 mmol) is added and the mixture is stirred for 2 hours. The mixture is diluted with 10 mL  $\text{Et}_2\text{O}$ , washed with three portions of sat.  $\text{LiCl}_{(\text{aq})}$  solution, and dried over anhydrous  $\text{MgSO}_4$ . The solvent is concentrated *in vacuo* and the crude product is purified by flash column chromatography (9:1 v/v hexanes:EtOAc) affording the product 1-methyl-2-phenylethynylindole (13.8 mg, 0.0597 mmol) as a pale-yellow solid in an 89.5% yield. The  $^1\text{H}$  and  $^{13}\text{C}$  NMR spectra are consistent with those reported in the literature.<sup>11</sup>

### C. Standard Curve for the Response Factor of **1**

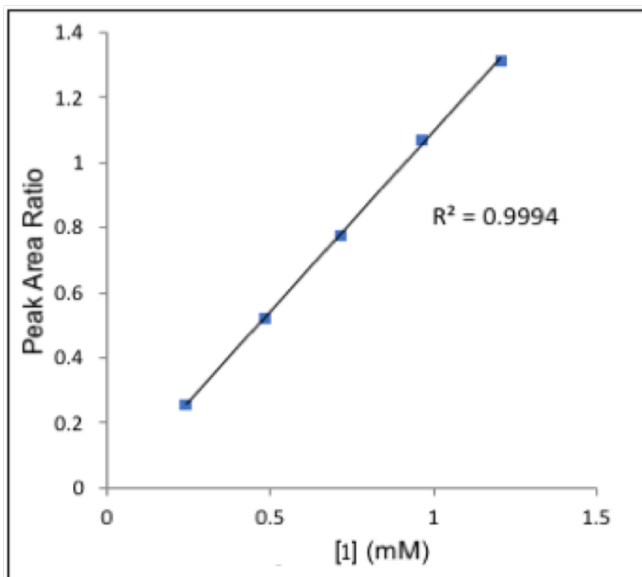

**Figure S1.** Standard curve showing change in the integrated peak area ratio of naphthalene to **1** as a function of varying **1** concentration.

## D. Kinetics Data for the Carboxylative Cyclization Reaction of 1

**Table S1.** Raw kinetics data for 40 mol% TBD loading in diglyme, run number 1.

| Time (h) | Naphthalene Area | 1 Area  | 2 Area  | Peak Ratio (1/Naphthalene) | 1 Concentration (M) |
|----------|------------------|---------|---------|----------------------------|---------------------|
| 0        | 6749.1           | 8516.7  | 0       | 1.2619016                  | 0.1815              |
| 1        | 15769.3          | 17244.5 | 5055.4  | 1.0935489                  | 0.1572857           |
| 2        | 9940.4           | 9383.6  | 5161.7  | 0.9439862                  | 0.1357740           |
| 3        | 11028.2          | 9244.5  | 7515.5  | 0.8382601                  | 0.1205674           |
| 4        | 9177.1           | 7000.0  | 7104.9  | 0.7627682                  | 0.1097094           |
| 6        | 12408.6          | 8179.8  | 11800.1 | 0.6592041                  | 0.0948137           |
| 8        | 11064.2          | 6278.5  | 11758.1 | 0.5674608                  | 0.0816182           |
| 10       | 13235.2          | 6678.5  | 15752.4 | 0.5046014                  | 0.0725771           |
| 12       | 15098.3          | 6714.1  | 19484.1 | 0.4446924                  | 0.0639604           |

**Table S2.** Raw kinetics data for 40 mol% TBD loading in diglyme, run number 2.

| Time (h) | Naphthalene Area | 1 Area  | 2 Area  | Peak Ratio (1/Naphthalene) | 1 Concentration (M) |
|----------|------------------|---------|---------|----------------------------|---------------------|
| 0        | 8594.2           | 13089.7 | 0       | 1.5230853                  | 0.1821              |
| 1        | 14997.8          | 17605.5 | 5637.2  | 1.1738722                  | 0.1403481           |
| 2        | 7392.1           | 7370.7  | 4100.9  | 0.9971050                  | 0.1192138           |
| 3        | 10228.4          | 9366.7  | 7277.4  | 0.9157542                  | 0.1094875           |
| 4        | 11040.8          | 9280.6  | 9143.9  | 0.8405731                  | 0.1004989           |
| 6        | 11890.6          | 8739.2  | 12023.8 | 0.7349671                  | 0.0878726           |
| 8        | 13020.9          | 8330.7  | 14999.2 | 0.6397945                  | 0.0764938           |
| 10       | 12336.8          | 6682.3  | 15771.3 | 0.5416559                  | 0.0647603           |
| 12       | 9157.1           | 4763.9  | 13078.3 | 0.5202411                  | 0.0622000           |

**Table S3.** Raw kinetics data for 40 mol% TBD loading in diglyme, run number 3.

| Time (h) | Naphthalene Area | 1 Area  | 2 Area  | Peak Ratio (1/Naphthalene) | 1 Concentration (M) |
|----------|------------------|---------|---------|----------------------------|---------------------|
| 0        | 6937.4           | 9761.2  | 0       | 1.4070401                  | 0.1820              |
| 1        | 13026.2          | 14536.5 | 5548.6  | 1.1159433                  | 0.1443468           |
| 2        | 13091.9          | 12436.1 | 8964.5  | 0.9499080                  | 0.1228702           |
| 3        | 12747.2          | 10653.1 | 10836.6 | 0.8357208                  | 0.1081001           |
| 4        | 15035.4          | 11400.4 | 14646.3 | 0.7582372                  | 0.0980776           |
| 6        | 13571.1          | 8486.1  | 15871.6 | 0.6253067                  | 0.0808831           |
| 8        | 12532.5          | 6605.4  | 16631.3 | 0.5270616                  | 0.0681752           |
| 10       | 15520.3          | 6785.7  | 22351.3 | 0.4372145                  | 0.0565535           |
| 12       | 20304.6          | 7702.1  | 32241.3 | 0.3793278                  | 0.0490659           |

**Table S4.** Raw kinetics data for 20 mol% TBD loading in diglyme, run number 1.

| Time (h) | Naphthalene Area | 1 Area | 2 Area | Peak Ratio (1/Naphthalene) | 1 Concentration (M) |
|----------|------------------|--------|--------|----------------------------|---------------------|
| 0        | 5368.4           | 7642.4 | 0      | 1.4235899                  | 0.1818              |
| 1        | 2407.1           | 2932.2 | 447.2  | 1.2181463                  | 0.1555638           |
| 2        | 3799.0           | 4361.6 | 1261.5 | 1.1480916                  | 0.1466174           |
| 3        | 5383.2           | 5866.4 | 2387.1 | 1.0897607                  | 0.1391682           |
| 4        | 4124.6           | 4200.5 | 2140.1 | 1.0184018                  | 0.1300553           |
| 6        | 4410.2           | 4071.4 | 2890.0 | 0.9231781                  | 0.1178948           |
| 8        | 4522.3           | 3901.1 | 3460.2 | 0.8626363                  | 0.1101632           |
| 10       | 6033.4           | 4979.0 | 5179.4 | 0.8252395                  | 0.1053875           |
| 12       | 6331.2           | 4876.5 | 5843.5 | 0.7702331                  | 0.0983629           |

**Table S5.** Raw kinetics data for 20 mol% TBD loading in diglyme, run number 2.

| Time (h) | Naphthalene Area | 1 Area | 2 Area | Peak Ratio (1/Naphthalene) | 1 Concentration (M) |
|----------|------------------|--------|--------|----------------------------|---------------------|
| 0        | 2981.0           | 4330.8 | 0      | 1.4528011                  | 0.1819              |
| 1        | 3323.7           | 4314.1 | 562.1  | 1.2979812                  | 0.1625156           |
| 2        | 4192.8           | 5119.2 | 1252.5 | 1.2209502                  | 0.1528708           |
| 3        | 5337.1           | 6155.0 | 2147.8 | 1.1532480                  | 0.1443940           |
| 4        | 4943.2           | 5350.7 | 2362.7 | 1.0824365                  | 0.1355280           |
| 6        | 3952.2           | 3766.3 | 2321.7 | 0.9529629                  | 0.1193171           |
| 8        | 7321.7           | 6479.7 | 5335.2 | 0.8849994                  | 0.1108076           |
| 10       | 4123.8           | 3185.4 | 3152.5 | 0.7724429                  | 0.0967148           |
| 12       | 5792.5           | 4388.9 | 5172.8 | 0.7576867                  | 0.0948672           |

**Table S6.** Raw kinetics data for 10 mol% TBD loading in diglyme, run number 1.

| Time (h) | Naphthalene Area | 1 Area | 2 Area | Peak Ratio (1/Naphthalene) | 1 Concentration (M) |
|----------|------------------|--------|--------|----------------------------|---------------------|
| 0        | 3112.1           | 4346.2 | 0      | 1.3965490                  | 0.1817              |
| 1        | 3957.3           | 5168.7 | 202.6  | 1.3061178                  | 0.1699343           |
| 2        | 4812.0           | 6183.2 | 459.9  | 1.2849543                  | 0.1671808           |
| 3        | 5100.6           | 6495.2 | 678.2  | 1.2734188                  | 0.1656800           |
| 4        | 5252.3           | 6376.6 | 850.5  | 1.2140586                  | 0.1579568           |
| 6        | 4601.0           | 5399.3 | 968.5  | 1.1735058                  | 0.1526806           |
| 8        | 7485.6           | 8468.3 | 1883.8 | 1.1312787                  | 0.1471866           |
| 10       | 5589.1           | 6172.1 | 1562.1 | 1.1043102                  | 0.1436779           |
| 12       | 5308.0           | 5684.1 | 1658.6 | 1.0708553                  | 0.1393252           |

**Table S7.** Raw kinetics data for 10 mol% TBD loading in diglyme, run number 2.

| Time (h) | Naphthalene Area | 1 Area  | 2 Area | Peak Ratio (1/Naphthalene) | 1 Concentration (M) |
|----------|------------------|---------|--------|----------------------------|---------------------|
| 0        | 4416.1           | 6295.6  | 0      | 1.4256018                  | 0.1817              |
| 1        | 9865.7           | 12459.6 | 417.8  | 1.2629210                  | 0.1609655           |
| 2        | 9679.3           | 12238.2 | 825.6  | 1.2643683                  | 0.1611500           |
| 3        | 12917.1          | 16289.8 | 1628.9 | 1.2611035                  | 0.1607339           |
| 4        | 9528.2           | 11464.5 | 1406.4 | 1.2032178                  | 0.1533561           |
| 6        | 11456.7          | 13680.7 | 2296.9 | 1.1941222                  | 0.1521968           |
| 8        | 12351.0          | 14353.6 | 2918.2 | 1.1621407                  | 0.1481206           |
| 10       | 10467.2          | 11792.5 | 2729.0 | 1.1266146                  | 0.1435926           |
| 12       | 10241.3          | 11442.7 | 2962.6 | 1.1173093                  | 0.1424066           |

**Table S8.** Raw kinetics data for 40 mol% TBD loading in acetonitrile.

| Time (h) | Naphthalene Area | 1 Area  | 2 Area  | Peak Ratio (1/Naphthalene) | 1 Concentration (M) |
|----------|------------------|---------|---------|----------------------------|---------------------|
| 0        | 1638.5           | 16043.0 | 0       | 9.7912725                  | 0.1814              |
| 1        | 2667.5           | 17078.3 | 5723.5  | 6.4023618                  | 0.1186147           |
| 2        | 1852.8           | 10444.2 | 5247.4  | 5.6369819                  | 0.1044347           |
| 3        | 1986.4           | 10385.8 | 6743.1  | 5.2284535                  | 0.0968660           |
| 4        | 4519.6           | 22587.7 | 18304.2 | 4.9977210                  | 0.0925913           |
| 5        | 3429.7           | 16110.6 | 15194.7 | 4.6973788                  | 0.0870269           |
| 6        | 4620.3           | 20772.2 | 22414.9 | 4.4958552                  | 0.0832934           |
| 8        | 3625.5           | 14506.0 | 19688.4 | 4.0011033                  | 0.0741273           |
| 10       | 3701.2           | 12963.9 | 21284.0 | 3.5026208                  | 0.0648920           |
| 12       | 11418.1          | 34938.0 | 58724.7 | 3.0598786                  | 0.0566895           |



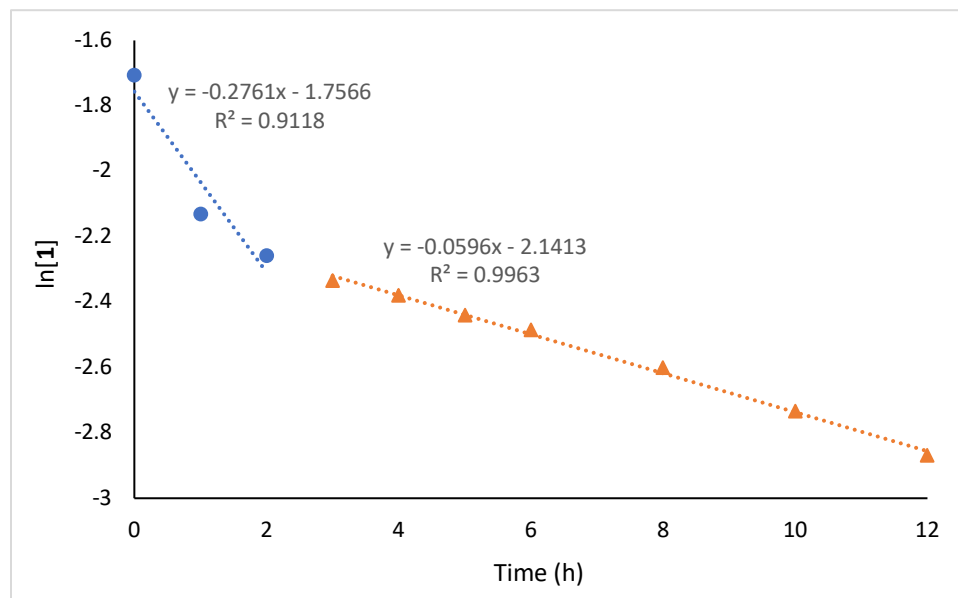

**Figure S2.** Kinetic profile of TBD catalyzed carboxylative cyclization of **1** in MeCN at 40 mol % catalyst loading. Data separated at the time of one catalyst turnover.

## E. Computed Thermal Stability of the TBD:CO<sub>2</sub> Adduct

**Table S9.** Computational energy values for the thermal stability of the TBD:CO<sub>2</sub> adduct in various solvents.

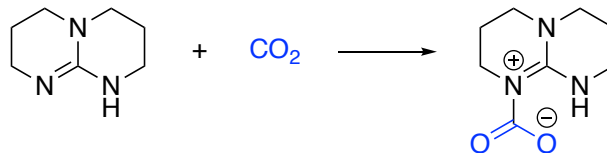

| Solvent           | Temperature (K) | $\Delta G$ (kcal/mol) |
|-------------------|-----------------|-----------------------|
| MeCN              | 298.15          | -5.1                  |
| MeCN              | 373.15          | -1.8                  |
| Et <sub>2</sub> O | 298.15          | -2.2                  |
| Et <sub>2</sub> O | 373.15          | 0.6                   |

Although diglyme was used for kinetic experiments, Et<sub>2</sub>O was chosen for computational modelling as it is a similar solvent available in the Gaussian package, being both aprotic and having a dielectric constant similar to that of diglyme.<sup>12</sup>

## F. Non-covalent Interactions of Int3

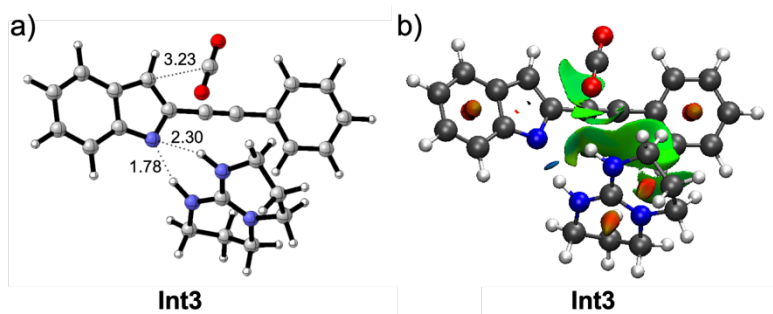

**Figure S3:** (a) Geometry of **Int3** (b) Non-covalent interactions of **Int3** (attractive, blue > green; repulsive, yellow < red).

In **Int3**, TBDH<sup>+</sup> preferentially orients CO<sub>2</sub> above the indole-3 position, stabilizing the complex through non-covalent interactions with both the substrate and the protonated catalyst (Figure S3). A non-covalent interaction (NCI) plot was generated for **Int3** which shows favourable interactions (green) between TBDH<sup>+</sup> and CO<sub>2</sub> as well as what is likely a  $\pi \rightarrow \pi^*$  interaction between the  $\pi$  systems of the indole ring and CO<sub>2</sub>.<sup>7,8</sup> The plot also shows strongly favourable interactions between the TBDH<sup>+</sup> and indole anion (blue-green), as well as a  $\pi$ -stacking interaction between the TBDH<sup>+</sup> and the phenyl ring of the substrate (green).

## G. Computed Catalytic Cycles

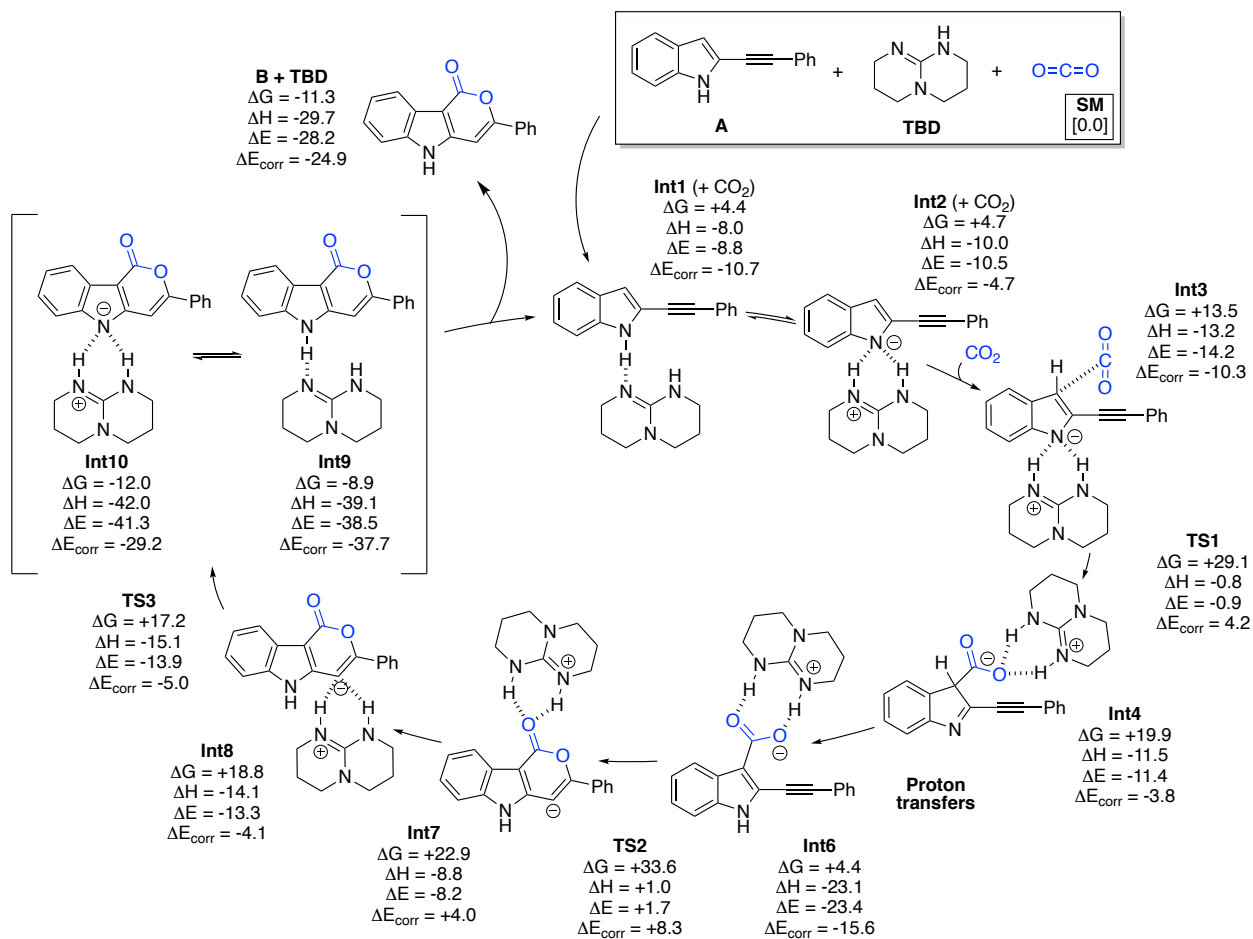

**Scheme S1.** Proposed catalytic cycle for carboxylative cyclization of indole derivatives. All values are relative to SM and are reported in kcal/mol.

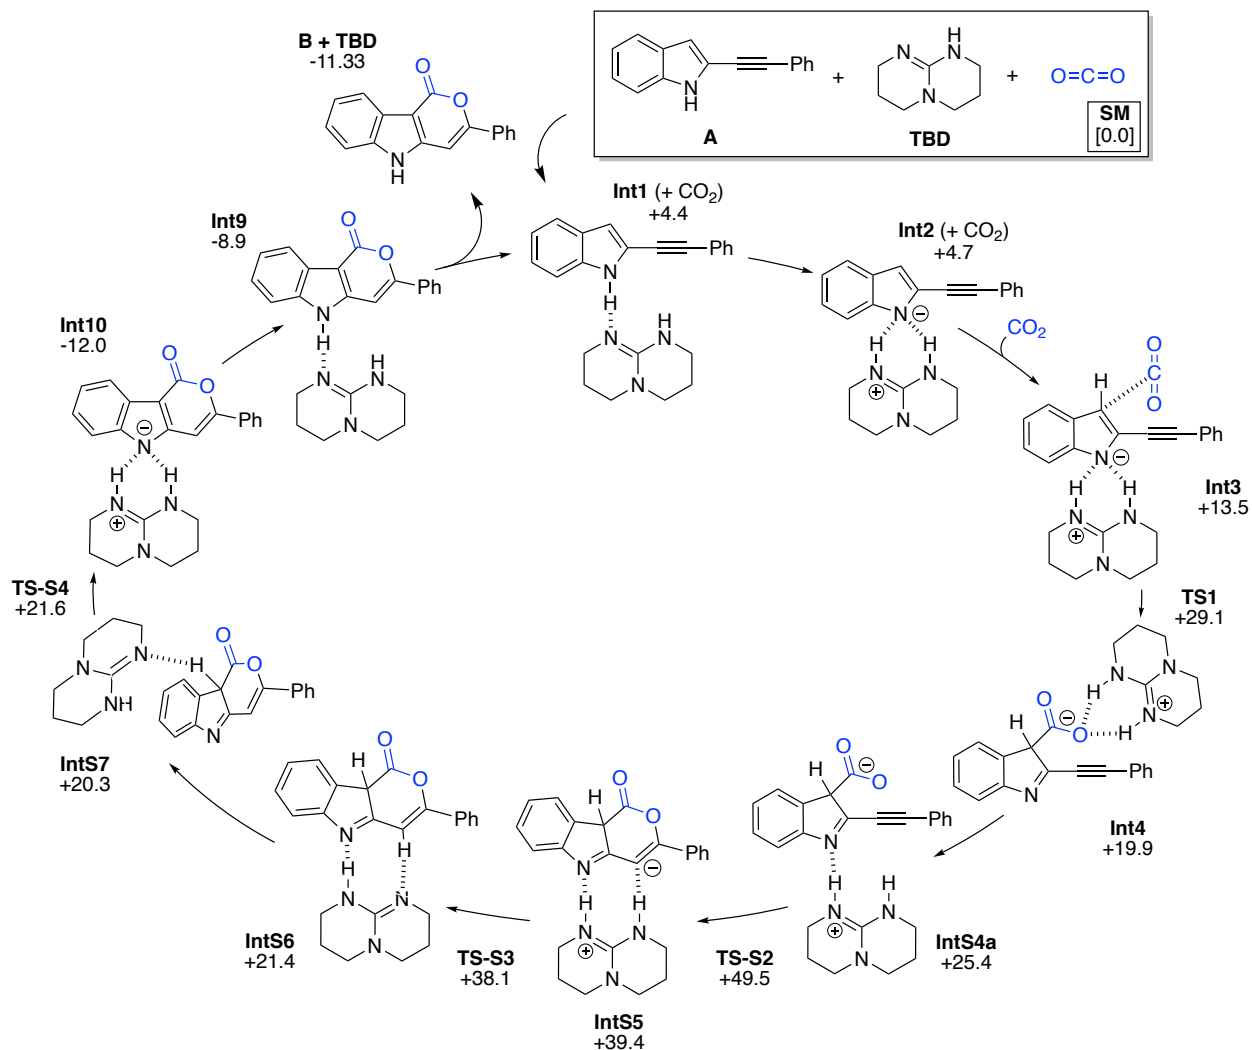

**Scheme S2.** Alternative catalytic cycle. All values are Gibbs free energies relative to **SM** and are reported in kcal/mol.

In this cycle (Scheme S2) only one molecule of TBD is invoked throughout and deprotonation of the indole-3 position occurs after cyclization. In this pathway, the cyclization was found to be the rate determining step, however the barrier was found to be unreasonably high for the given experimental conditions.

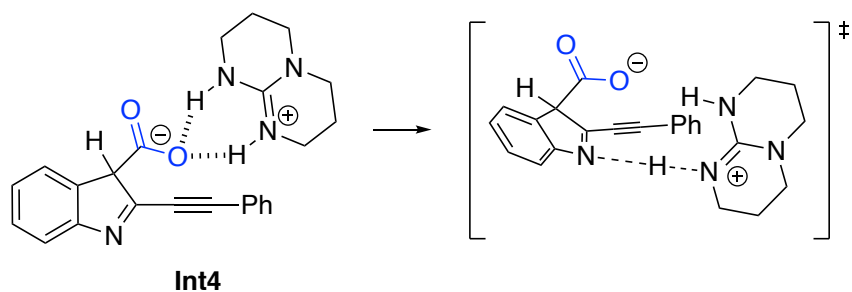

**Scheme S3.** Transition state of alternative catalytic cyclic.

An alternative catalytic cycle which proceeds from **Int4** through a transition state in which TBDH<sup>+</sup> protonates the indole nitrogen was also considered (Scheme S3). However, all attempts to locate this transition state resulted in the loss of CO<sub>2</sub> from the indole-3 position, indicating that this pathway is likely not productive to forming the product (**B**).

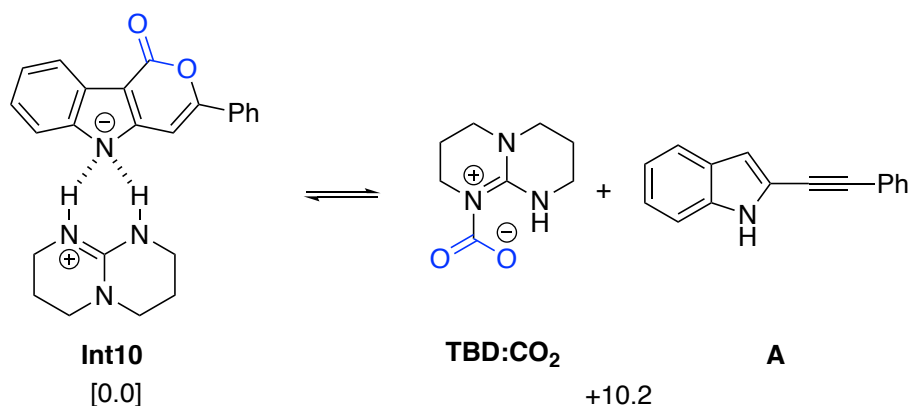

**Scheme S4.** Relative Gibbs free energy (kcal/mol) between proposed catalyst resting state (**Int10**) and **TBD:CO<sub>2</sub>** complex.

## H. Computational Structures, Energies and Coordinates

### CO2 (Optimized in diethyl ether)

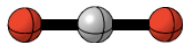

Calculated using M06-2X/def2TZVP in diethyl ether at 373.15 K:

```
HF = -188.5986217 hartrees
Zero-point correction=                0.011917 (Hartree/Particle)
Thermal correction to Gibbs Free Energy= -0.014974
Sum of electronic and zero-point Energies= -188.586705
Sum of electronic and thermal Enthalpies= -188.582072
Sum of electronic and thermal Free Energies= -188.613596
```

Calculated using M06-2X/def2TZVP in diethyl ether at 298.15 K:

```
Thermal correction to Gibbs Free Energy= -0.008757
Sum of electronic and thermal Free Energies= -188.607379
```

Standard orientation:

| Center<br>Number | Atomic<br>Number | Atomic<br>Type | Coordinates (Angstroms) |          |           |
|------------------|------------------|----------------|-------------------------|----------|-----------|
|                  |                  |                | X                       | Y        | Z         |
| 1                | 6                | 0              | 0.000000                | 0.000000 | 0.000000  |
| 2                | 8                | 0              | 0.000000                | 0.000000 | 1.154562  |
| 3                | 8                | 0              | 0.000000                | 0.000000 | -1.154562 |

## TBD (Optimized in diethyl ether)

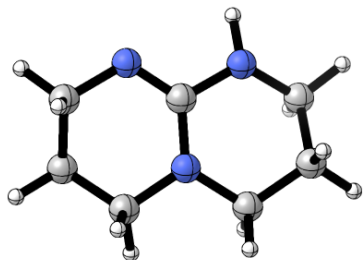

Calculated using M06-2X/def2TZVP in diethyl ether at 373.15 K:

```
HF = -438.8012035 hartrees
Zero-point correction=          0.207149 (Hartree/Particle)
Thermal correction to Gibbs Free Energy=    0.162079
Sum of electronic and zero-point Energies=  -438.594055
Sum of electronic and thermal Enthalpies=  -438.579562
Sum of electronic and thermal Free Energies= -438.639124
```

Calculated using M06-2X/def2TZVP in diethyl ether at 298.15 K:

```
Thermal correction to Gibbs Free Energy=    0.173505
Sum of electronic and thermal Free Energies= -438.627698
```

Standard orientation:

| Center<br>Number | Atomic<br>Number | Atomic<br>Type | Coordinates (Angstroms) |           |           |
|------------------|------------------|----------------|-------------------------|-----------|-----------|
|                  |                  |                | X                       | Y         | Z         |
| 1                | 6                | 0              | -0.068552               | -0.739393 | -0.083615 |
| 2                | 7                | 0              | 1.152866                | -1.389945 | -0.050388 |
| 3                | 1                | 0              | 1.039549                | -2.362659 | 0.188140  |
| 4                | 7                | 0              | -1.131858               | -1.462098 | -0.121165 |
| 5                | 7                | 0              | -0.022357               | 0.630991  | -0.128101 |
| 6                | 6                | 0              | 2.344320                | -0.717959 | 0.425471  |
| 7                | 6                | 0              | 1.197738                | 1.418086  | -0.015866 |
| 8                | 6                | 0              | 2.442329                | 0.603455  | -0.311135 |
| 9                | 6                | 0              | -1.253820               | 1.407154  | -0.052036 |
| 10               | 6                | 0              | -2.396877               | -0.768576 | -0.262291 |
| 11               | 6                | 0              | -2.398725               | 0.563004  | 0.473531  |
| 12               | 1                | 0              | -3.189778               | -1.415050 | 0.117548  |
| 13               | 1                | 0              | -2.620009               | -0.591843 | -1.323562 |
| 14               | 1                | 0              | -2.260621               | 0.379813  | 1.541887  |
| 15               | 1                | 0              | -3.341552               | 1.094551  | 0.339975  |
| 16               | 1                | 0              | -1.070691               | 2.260414  | 0.607032  |
| 17               | 1                | 0              | -1.496900               | 1.808796  | -1.042327 |
| 18               | 1                | 0              | 1.119873                | 2.261083  | -0.708214 |
| 19               | 1                | 0              | 1.262969                | 1.839363  | 0.996021  |
| 20               | 1                | 0              | 3.323465                | 1.164183  | 0.000262  |
| 21               | 1                | 0              | 2.520076                | 0.405920  | -1.381679 |
| 22               | 1                | 0              | 2.320806                | -0.540626 | 1.509338  |
| 23               | 1                | 0              | 3.203780                | -1.351215 | 0.208806  |



### TBD:CO2 (Optimized in diethyl ether)

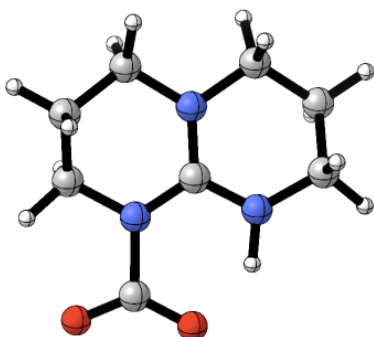

Calculated using M06-2X/def2TZVP in diethyl ether at 373.15 K:

```
HF = -627.4235667 hartrees
Zero-point correction=                0.222594 (Hartree/Particle)
Thermal correction to Gibbs Free Energy= 0.171781
Sum of electronic and zero-point Energies= -627.200973
Sum of electronic and thermal Enthalpies= -627.182901
Sum of electronic and thermal Free Energies= -627.251786
```

Calculated using M06-2X/def2TZVP in diethyl ether at 298.15 K:

```
Thermal correction to Gibbs Free Energy= 0.184956
Sum of electronic and thermal Free Energies= -627.238610
```

Standard orientation:

| Center Number | Atomic Number | Atomic Type | Coordinates (Angstroms) |           |           |
|---------------|---------------|-------------|-------------------------|-----------|-----------|
|               |               |             | X                       | Y         | Z         |
| 1             | 6             | 0           | -0.203119               | -0.173779 | -0.048814 |
| 2             | 7             | 0           | -0.613188               | -1.425322 | -0.203502 |
| 3             | 1             | 0           | 0.177348                | -2.089411 | -0.231925 |
| 4             | 7             | 0           | 1.122863                | 0.087331  | 0.046050  |
| 5             | 7             | 0           | -1.105074               | 0.820541  | 0.025437  |
| 6             | 6             | 0           | -2.005297               | -1.807931 | -0.327169 |
| 7             | 6             | 0           | -2.544352               | 0.557642  | 0.060146  |
| 8             | 6             | 0           | -2.847479               | -0.858591 | 0.500828  |
| 9             | 6             | 0           | -0.754891               | 2.237772  | -0.003423 |
| 10            | 6             | 0           | 1.555841                | 1.463964  | 0.283502  |
| 11            | 6             | 0           | 0.666891                | 2.423342  | -0.475696 |
| 12            | 1             | 0           | 2.587622                | 1.525725  | -0.041574 |
| 13            | 1             | 0           | 1.528790                | 1.682826  | 1.355568  |
| 14            | 1             | 0           | 0.740395                | 2.220236  | -1.545870 |
| 15            | 1             | 0           | 0.982904                | 3.450938  | -0.301791 |
| 16            | 1             | 0           | -1.463108               | 2.733405  | -0.670731 |
| 17            | 1             | 0           | -0.890404               | 2.657666  | 0.997803  |
| 18            | 1             | 0           | -2.982277               | 1.279894  | 0.751356  |
| 19            | 1             | 0           | -2.964668               | 0.751368  | -0.931748 |
| 20            | 1             | 0           | -3.908471               | -1.062720 | 0.366307  |
| 21            | 1             | 0           | -2.604401               | -0.982870 | 1.557422  |
| 22            | 1             | 0           | -2.318026               | -1.778083 | -1.375173 |
| 23            | 1             | 0           | -2.100198               | -2.834201 | 0.021633  |
| 24            | 6             | 0           | 2.191969                | -0.961845 | 0.046286  |
| 25            | 8             | 0           | 3.315249                | -0.520487 | 0.245090  |
| 26            | 8             | 0           | 1.812864                | -2.131522 | -0.150232 |

## CO2 (Optimized in acetonitrile)

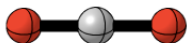

Calculated using M06-2X/def2TZVP in acetonitrile at 373.15 K:

```
HF = -188.5993547 hartrees
Zero-point correction=          0.011877 (Hartree/Particle)
Thermal correction to Gibbs Free Energy= -0.015835
Sum of electronic and zero-point Energies= -188.587478
Sum of electronic and thermal Enthalpies= -188.582842
Sum of electronic and thermal Free Energies= -188.615190
```

Calculated using M06-2X/def2TZVP in acetonitrile at 298.15 K:

```
Thermal correction to Gibbs Free Energy= -0.008798
Sum of electronic and thermal Free Energies= -188.608153
```

Single Points using M06-2X/def2TZVP in the gas phase:

```
HF = -188.5969402 hartrees
```

Standard orientation:

| Center<br>Number | Atomic<br>Number | Atomic<br>Type | Coordinates (Angstroms) |          |           |
|------------------|------------------|----------------|-------------------------|----------|-----------|
|                  |                  |                | X                       | Y        | Z         |
| 1                | 6                | 0              | 0.000000                | 0.000000 | -0.000000 |
| 2                | 8                | 0              | 0.000000                | 0.000000 | -1.154562 |
| 3                | 8                | 0              | 0.000000                | 0.000000 | 1.154562  |

## TBD (Optimized in acetonitrile)

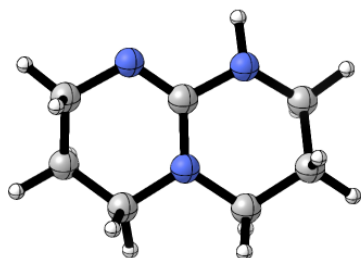

Calculated using M06-2X/def2TZVP in acetonitrile at 373.15 K:

```
HF = -438.8044082 hartrees
Zero-point correction=                0.207092 (Hartree/Particle)
Thermal correction to Gibbs Free Energy= 0.162080
Sum of electronic and zero-point Energies= -438.597316
Sum of electronic and thermal Enthalpies= -438.582827
Sum of electronic and thermal Free Energies= -438.642328
```

Calculated using M06-2X/def2TZVP in acetonitrile at 298.15 K:

```
Thermal correction to Gibbs Free Energy= 0.173493
Sum of electronic and thermal Free Energies= -438.630915
```

Single Points using M06-2X/def2TZVP in the gas phase:

```
HF = -438.794646 hartrees
```

Standard orientation:

| Center Number | Atomic Number | Atomic Type | Coordinates (Angstroms) |           |           |
|---------------|---------------|-------------|-------------------------|-----------|-----------|
|               |               |             | X                       | Y         | Z         |
| 1             | 6             | 0           | -0.066973               | -0.738814 | -0.082508 |
| 2             | 7             | 0           | 1.153189                | -1.390464 | -0.046725 |
| 3             | 1             | 0           | 1.043290                | -2.360399 | 0.204886  |
| 4             | 7             | 0           | -1.132906               | -1.463803 | -0.122652 |
| 5             | 7             | 0           | -0.023150               | 0.628319  | -0.127437 |
| 6             | 6             | 0           | 2.347948                | -0.715911 | 0.423026  |
| 7             | 6             | 0           | 1.197625                | 1.417667  | -0.014862 |
| 8             | 6             | 0           | 2.441845                | 0.604849  | -0.314276 |
| 9             | 6             | 0           | -1.254853               | 1.406342  | -0.049844 |
| 10            | 6             | 0           | -2.397889               | -0.766738 | -0.265353 |
| 11            | 6             | 0           | -2.399706               | 0.562252  | 0.474226  |
| 12            | 1             | 0           | -3.193618               | -1.412802 | 0.109634  |
| 13            | 1             | 0           | -2.618333               | -0.584546 | -1.326336 |
| 14            | 1             | 0           | -2.262371               | 0.377311  | 1.542416  |
| 15            | 1             | 0           | -3.342162               | 1.094042  | 0.340783  |
| 16            | 1             | 0           | -1.069565               | 2.257467  | 0.610547  |
| 17            | 1             | 0           | -1.496651               | 1.809515  | -1.039375 |
| 18            | 1             | 0           | 1.115607                | 2.261323  | -0.705166 |
| 19            | 1             | 0           | 1.262200                | 1.835248  | 0.997822  |
| 20            | 1             | 0           | 3.322876                | 1.166088  | -0.004432 |
| 21            | 1             | 0           | 2.518138                | 0.409205  | -1.385435 |
| 22            | 1             | 0           | 2.326874                | -0.538758 | 1.506304  |
| 23            | 1             | 0           | 3.205792                | -1.349941 | 0.203608  |

### TBD:CO2 (Optimized in acetonitrile)

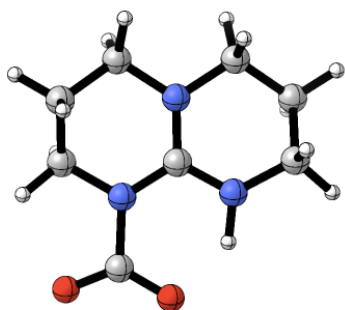

Calculated using M06-2X/def2TZVP in acetonitrile at 373.15 K:

```
HF = -627.4323609 hartrees
Zero-point correction=          0.222749 (Hartree/Particle)
Thermal correction to Gibbs Free Energy=    0.171989
Sum of electronic and zero-point Energies=   -627.209612
Sum of electronic and thermal Enthalpies=    -627.191558
Sum of electronic and thermal Free Energies=  -627.260372
```

Calculated using M06-2X/def2TZVP in acetonitrile at 298.15 K:

```
Thermal correction to Gibbs Free Energy=    0.185150
Sum of electronic and thermal Free Energies=  -627.247211
```

Standard orientation:

| Center Number | Atomic Number | Atomic Type | Coordinates (Angstroms) |           |           |
|---------------|---------------|-------------|-------------------------|-----------|-----------|
|               |               |             | X                       | Y         | Z         |
| 1             | 6             | 0           | -0.205769               | -0.175893 | -0.055079 |
| 2             | 7             | 0           | -0.622070               | -1.425420 | -0.208965 |
| 3             | 1             | 0           | 0.151443                | -2.099434 | -0.243922 |
| 4             | 7             | 0           | 1.128353                | 0.081665  | 0.034706  |
| 5             | 7             | 0           | -1.098996               | 0.819488  | 0.024485  |
| 6             | 6             | 0           | -2.018674               | -1.802895 | -0.324194 |
| 7             | 6             | 0           | -2.541643               | 0.564180  | 0.065050  |
| 8             | 6             | 0           | -2.850578               | -0.849298 | 0.507837  |
| 9             | 6             | 0           | -0.745823               | 2.237047  | 0.005599  |
| 10            | 6             | 0           | 1.565453                | 1.460824  | 0.267385  |
| 11            | 6             | 0           | 0.669845                | 2.421181  | -0.481114 |
| 12            | 1             | 0           | 2.591881                | 1.525129  | -0.072627 |
| 13            | 1             | 0           | 1.550992                | 1.678503  | 1.339498  |
| 14            | 1             | 0           | 0.731249                | 2.220707  | -1.552469 |
| 15            | 1             | 0           | 0.990413                | 3.447061  | -0.307029 |
| 16            | 1             | 0           | -1.460087               | 2.738151  | -0.649966 |
| 17            | 1             | 0           | -0.870157               | 2.646342  | 1.011999  |
| 18            | 1             | 0           | -2.970010               | 1.289709  | 0.757834  |
| 19            | 1             | 0           | -2.961391               | 0.760601  | -0.925690 |
| 20            | 1             | 0           | -3.912800               | -1.047421 | 0.376384  |
| 21            | 1             | 0           | -2.604646               | -0.974645 | 1.563538  |
| 22            | 1             | 0           | -2.334747               | -1.770736 | -1.370461 |
| 23            | 1             | 0           | -2.114082               | -2.828409 | 0.025859  |
| 24            | 6             | 0           | 2.180933                | -0.957978 | 0.049325  |
| 25            | 8             | 0           | 3.310417                | -0.530023 | 0.277011  |
| 26            | 8             | 0           | 1.819392                | -2.132314 | -0.166184 |

A

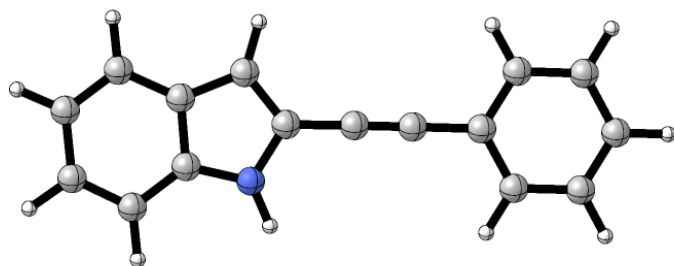

Calculated using M06-2X/def2TZVP in acetonitrile at 373.15 K:

```

HF = -671.0070206 hartrees
Zero-point correction=                0.222360 (Hartree/Particle)
Thermal correction to Gibbs Free Energy= 0.165889
Sum of electronic and zero-point Energies= -670.784660
Sum of electronic and thermal Enthalpies= -670.763591
Sum of electronic and thermal Free Energies= -670.841131
  
```

Single Points using M06-2X/def2TZVP in the gas phase:

HF = -670.9976774 hartrees

Standard orientation:

| Center<br>Number | Atomic<br>Number | Atomic<br>Type | Coordinates (Angstroms) |           |           |
|------------------|------------------|----------------|-------------------------|-----------|-----------|
|                  |                  |                | X                       | Y         | Z         |
| 1                | 6                | 0              | 3.065096                | -0.766068 | -0.000016 |
| 2                | 6                | 0              | 2.970215                | 0.645336  | 0.000019  |
| 3                | 6                | 0              | 4.098966                | 1.467632  | 0.000112  |
| 4                | 6                | 0              | 5.332203                | 0.850356  | 0.000178  |
| 5                | 6                | 0              | 5.450818                | -0.553040 | 0.000106  |
| 6                | 6                | 0              | 4.335469                | -1.362400 | 0.000008  |
| 7                | 6                | 0              | 1.731477                | -1.272763 | -0.000141 |
| 8                | 6                | 0              | 0.890852                | -0.186753 | -0.000135 |
| 9                | 1                | 0              | 4.005674                | 2.545732  | 0.000139  |
| 10               | 1                | 0              | 6.228810                | 1.456719  | 0.000263  |
| 11               | 1                | 0              | 6.437460                | -0.997807 | 0.000136  |
| 12               | 1                | 0              | 4.433659                | -2.440774 | -0.000040 |
| 13               | 1                | 0              | 1.417731                | -2.303313 | -0.000208 |
| 14               | 7                | 0              | 1.642478                | 0.970337  | -0.000171 |
| 15               | 6                | 0              | -0.523965               | -0.141199 | -0.000172 |
| 16               | 6                | 0              | -1.728409               | -0.091844 | -0.000148 |
| 17               | 1                | 0              | 1.259540                | 1.901085  | 0.000157  |
| 18               | 6                | 0              | -3.155405               | -0.029819 | -0.000081 |
| 19               | 6                | 0              | -3.804404               | 1.209094  | -0.000097 |
| 20               | 6                | 0              | -3.915022               | -1.204395 | 0.000060  |
| 21               | 6                | 0              | -5.188469               | 1.267764  | 0.000012  |
| 22               | 1                | 0              | -3.215829               | 2.117045  | -0.000194 |
| 23               | 6                | 0              | -5.298820               | -1.135808 | 0.000192  |
| 24               | 1                | 0              | -3.412075               | -2.162440 | 0.000080  |
| 25               | 6                | 0              | -5.938737               | 0.097697  | 0.000153  |
| 26               | 1                | 0              | -5.683716               | 2.230015  | 0.000023  |
| 27               | 1                | 0              | -5.880055               | -2.048646 | 0.000321  |
| 28               | 1                | 0              | -7.019727               | 0.147286  | 0.000238  |

## Int1

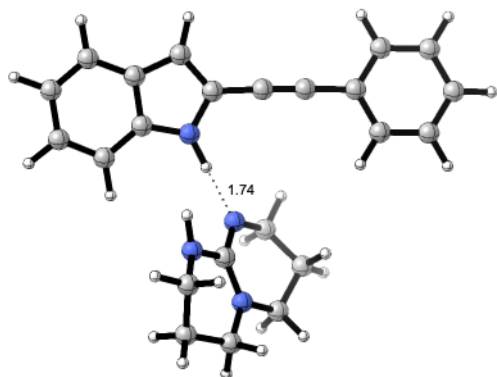

Calculated using M06-2X/def2TZVP in acetonitrile at 373.15 K:

```
HF = -1109.8263091 hartrees
Zero-point correction= 0.430276 (Hartree/Particle)
Thermal correction to Gibbs Free Energy= 0.349859
Sum of electronic and zero-point Energies= -1109.396033
Sum of electronic and thermal Enthalpies= -1109.359183
Sum of electronic and thermal Free Energies= -1109.476450
```

Single Points using M06-2X/def2TZVP in the gas phase:

Counterpoise corrected energy = -1109.810226776098

Standard orientation:

| Center<br>Number | Atomic<br>Number | Atomic<br>Type | Coordinates (Angstroms) |           |           |
|------------------|------------------|----------------|-------------------------|-----------|-----------|
|                  |                  |                | X                       | Y         | Z         |
| 1                | 6                | 0              | -1.705369               | -3.652340 | -0.012248 |
| 2                | 6                | 0              | -2.042333               | -2.297058 | 0.232727  |
| 3                | 6                | 0              | -3.362723               | -1.889650 | 0.451135  |
| 4                | 6                | 0              | -4.342176               | -2.859355 | 0.419480  |
| 5                | 6                | 0              | -4.027829               | -4.212177 | 0.176534  |
| 6                | 6                | 0              | -2.727509               | -4.614869 | -0.038172 |
| 7                | 6                | 0              | -0.291394               | -3.695353 | -0.184571 |
| 8                | 6                | 0              | 0.159173                | -2.401470 | -0.043573 |
| 9                | 1                | 0              | -3.599625               | -0.849212 | 0.636998  |
| 10               | 1                | 0              | -5.374618               | -2.579047 | 0.585300  |
| 11               | 1                | 0              | -4.826276               | -4.942906 | 0.159360  |
| 12               | 1                | 0              | -2.495611               | -5.656451 | -0.224414 |
| 13               | 1                | 0              | 0.323787                | -4.556112 | -0.388333 |
| 14               | 7                | 0              | -0.896765               | -1.558328 | 0.208790  |
| 15               | 6                | 0              | 1.480173                | -1.892190 | -0.120607 |
| 16               | 6                | 0              | 2.592608                | -1.430348 | -0.177785 |
| 17               | 6                | 0              | -1.411162               | 2.087935  | -0.002400 |
| 18               | 7                | 0              | -2.299779               | 1.655991  | -0.962313 |
| 19               | 1                | 0              | -2.083641               | 0.731335  | -1.301335 |
| 20               | 7                | 0              | -0.666736               | 1.196505  | 0.574913  |
| 21               | 7                | 0              | -1.417519               | 3.414922  | 0.292719  |
| 22               | 6                | 0              | -2.900696               | 2.582512  | -1.903980 |
| 23               | 6                | 0              | -2.260949               | 4.402844  | -0.371743 |
| 24               | 6                | 0              | -3.420295               | 3.764399  | -1.110435 |
| 25               | 6                | 0              | -0.451685               | 3.968853  | 1.235534  |
| 26               | 6                | 0              | 0.207600                | 1.630991  | 1.649934  |

|    |   |   |           |           |           |
|----|---|---|-----------|-----------|-----------|
| 27 | 6 | 0 | 0.731535  | 3.037101  | 1.409280  |
| 28 | 1 | 0 | 1.032678  | 0.919007  | 1.726945  |
| 29 | 1 | 0 | -0.322498 | 1.603792  | 2.610846  |
| 30 | 1 | 0 | 1.340202  | 3.046699  | 0.501990  |
| 31 | 1 | 0 | 1.351592  | 3.377804  | 2.238442  |
| 32 | 1 | 0 | -0.127039 | 4.936001  | 0.844955  |
| 33 | 1 | 0 | -0.942400 | 4.151607  | 2.197355  |
| 34 | 1 | 0 | -2.627047 | 5.094646  | 0.390694  |
| 35 | 1 | 0 | -1.645905 | 4.984156  | -1.068612 |
| 36 | 1 | 0 | -3.880407 | 4.501982  | -1.766845 |
| 37 | 1 | 0 | -4.174393 | 3.414975  | -0.403003 |
| 38 | 1 | 0 | -2.181274 | 2.925108  | -2.657903 |
| 39 | 1 | 0 | -3.708968 | 2.066372  | -2.419181 |
| 40 | 1 | 0 | -0.818034 | -0.519131 | 0.345312  |
| 41 | 6 | 0 | 3.899977  | -0.858578 | -0.241801 |
| 42 | 6 | 0 | 5.034918  | -1.672714 | -0.311845 |
| 43 | 6 | 0 | 4.052193  | 0.531928  | -0.232369 |
| 44 | 6 | 0 | 6.296234  | -1.101695 | -0.370547 |
| 45 | 1 | 0 | 4.917586  | -2.748336 | -0.318521 |
| 46 | 6 | 0 | 5.316863  | 1.094242  | -0.290856 |
| 47 | 1 | 0 | 3.171831  | 1.159701  | -0.182656 |
| 48 | 6 | 0 | 6.441479  | 0.280328  | -0.360345 |
| 49 | 1 | 0 | 7.169838  | -1.738372 | -0.423212 |
| 50 | 1 | 0 | 5.425610  | 2.170968  | -0.283519 |
| 51 | 1 | 0 | 7.428417  | 0.721772  | -0.407497 |

---

## Int2

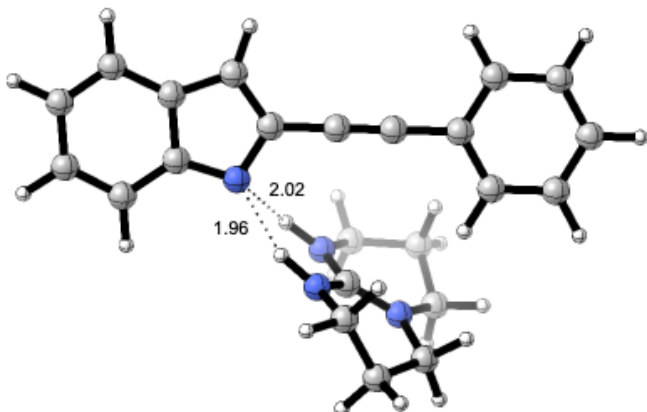

Calculated using M06-2X/def2TZVP in acetonitrile at 373.15 K:

```
HF = -1109.8301982 hartrees
Zero-point correction=                0.431497 (Hartree/Particle)
Thermal correction to Gibbs Free Energy= 0.354301
Sum of electronic and zero-point Energies= -1109.398701
Sum of electronic and thermal Enthalpies= -1109.362281
Sum of electronic and thermal Free Energies= -1109.475897
```

Single Points using M06-2X/def2TZVP in the gas phase:

Counterpoise corrected energy = -1109.801934275659

Standard orientation:

| Center Number | Atomic Number | Atomic Type | Coordinates (Angstroms) |           |           |
|---------------|---------------|-------------|-------------------------|-----------|-----------|
|               |               |             | X                       | Y         | Z         |
| 1             | 6             | 0           | -4.004919               | -1.432000 | -0.094955 |
| 2             | 6             | 0           | -3.593565               | -0.062489 | -0.058960 |
| 3             | 6             | 0           | -4.552826               | 0.963055  | 0.015548  |
| 4             | 6             | 0           | -5.887400               | 0.621679  | 0.051604  |
| 5             | 6             | 0           | -6.298492               | -0.729920 | 0.015372  |
| 6             | 6             | 0           | -5.375423               | -1.749989 | -0.057215 |
| 7             | 6             | 0           | -2.807683               | -2.184959 | -0.164356 |
| 8             | 6             | 0           | -1.783698               | -1.243922 | -0.167137 |
| 9             | 1             | 0           | -4.240090               | 2.000966  | 0.043458  |
| 10            | 1             | 0           | -6.638488               | 1.400099  | 0.110452  |
| 11            | 1             | 0           | -7.356246               | -0.960906 | 0.045281  |
| 12            | 1             | 0           | -5.701593               | -2.783782 | -0.083920 |
| 13            | 1             | 0           | -2.691814               | -3.256672 | -0.205814 |
| 14            | 7             | 0           | -2.237885               | 0.048610  | -0.103523 |
| 15            | 6             | 0           | -0.387097               | -1.522579 | -0.218342 |
| 16            | 6             | 0           | 0.796891                | -1.761278 | -0.252490 |
| 17            | 6             | 0           | 0.602677                | 1.811931  | 0.228549  |
| 18            | 7             | 0           | -0.075086               | 1.818121  | -0.920949 |
| 19            | 1             | 0           | -0.973047               | 1.321169  | -0.888713 |
| 20            | 7             | 0           | -0.026605               | 1.385986  | 1.323241  |
| 21            | 7             | 0           | 1.868794                | 2.235590  | 0.283438  |
| 22            | 6             | 0           | 0.573952                | 2.137280  | -2.179408 |
| 23            | 6             | 0           | 2.537515                | 2.862322  | -0.858549 |
| 24            | 6             | 0           | 1.547612                | 3.274253  | -1.932262 |



|    |   |   |           |           |           |
|----|---|---|-----------|-----------|-----------|
| 25 | 6 | 0 | 2.677500  | 2.081892  | 1.493439  |
| 26 | 6 | 0 | 0.625604  | 1.282332  | 2.618100  |
| 27 | 6 | 0 | 2.102848  | 1.013513  | 2.403050  |
| 28 | 1 | 0 | 0.150899  | 0.471078  | 3.165877  |
| 29 | 1 | 0 | 0.483748  | 2.205104  | 3.186775  |
| 30 | 1 | 0 | 2.227188  | 0.030734  | 1.942749  |
| 31 | 1 | 0 | 2.636743  | 1.019881  | 3.351706  |
| 32 | 1 | 0 | 3.684506  | 1.808968  | 1.170605  |
| 33 | 1 | 0 | 2.740722  | 3.044539  | 2.008652  |
| 34 | 1 | 0 | 3.082755  | 3.728953  | -0.480716 |
| 35 | 1 | 0 | 3.274913  | 2.160848  | -1.261905 |
| 36 | 1 | 0 | 2.089514  | 3.523305  | -2.842769 |
| 37 | 1 | 0 | 0.992550  | 4.157234  | -1.611748 |
| 38 | 1 | 0 | 1.098379  | 1.262674  | -2.579095 |
| 39 | 1 | 0 | -0.196068 | 2.424509  | -2.892020 |
| 40 | 1 | 0 | -0.929867 | 0.942623  | 1.149153  |
| 41 | 6 | 0 | 2.197269  | -2.042181 | -0.282906 |
| 42 | 6 | 0 | 2.671367  | -3.342476 | -0.077639 |
| 43 | 6 | 0 | 3.118399  | -1.013695 | -0.511720 |
| 44 | 6 | 0 | 4.033168  | -3.600032 | -0.097453 |
| 45 | 1 | 0 | 1.964011  | -4.142411 | 0.097619  |
| 46 | 6 | 0 | 4.478462  | -1.276864 | -0.527780 |
| 47 | 1 | 0 | 2.749104  | -0.009167 | -0.675330 |
| 48 | 6 | 0 | 4.940757  | -2.571025 | -0.319721 |
| 49 | 1 | 0 | 4.388659  | -4.609765 | 0.062609  |
| 50 | 1 | 0 | 5.178514  | -0.470161 | -0.704719 |
| 51 | 1 | 0 | 6.002976  | -2.777058 | -0.332244 |

---

### Int3

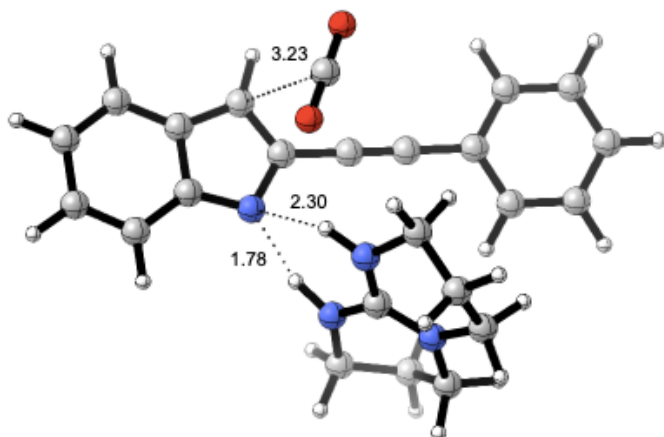

Calculated using M06-2X/def2TZVP in acetonitrile at 373.15 K:

```
HF = -1298.4362299 hartrees
Zero-point correction= 0.444082 (Hartree/Particle)
Thermal correction to Gibbs Free Energy= 0.359093
Sum of electronic and zero-point Energies= -1297.992148
Sum of electronic and thermal Enthalpies= -1297.950282
Sum of electronic and thermal Free Energies= -1298.077137
```

Single Points using M06-2X/def2TZVP in the gas phase:

Counterpoise corrected energy = -1298.408395134529

Standard orientation:

| Center Number | Atomic Number | Atomic Type | Coordinates (Angstroms) |           |           |
|---------------|---------------|-------------|-------------------------|-----------|-----------|
|               |               |             | X                       | Y         | Z         |
| 1             | 6             | 0           | 3.945025                | -0.882866 | -0.647165 |
| 2             | 6             | 0           | 3.455561                | 0.432894  | -0.373471 |
| 3             | 6             | 0           | 4.349409                | 1.470768  | -0.054911 |
| 4             | 6             | 0           | 5.697875                | 1.193232  | -0.013299 |
| 5             | 6             | 0           | 6.187153                | -0.105109 | -0.283980 |
| 6             | 6             | 0           | 5.328943                | -1.135472 | -0.598451 |
| 7             | 6             | 0           | 2.796185                | -1.664363 | -0.922082 |
| 8             | 6             | 0           | 1.721585                | -0.787600 | -0.800528 |
| 9             | 1             | 0           | 3.975938                | 2.467293  | 0.152458  |
| 10            | 1             | 0           | 6.400197                | 1.981004  | 0.230624  |
| 11            | 1             | 0           | 7.254028                | -0.286401 | -0.242163 |
| 12            | 1             | 0           | 5.714979                | -2.127657 | -0.803912 |
| 13            | 1             | 0           | 2.741835                | -2.713094 | -1.169188 |
| 14            | 7             | 0           | 2.100057                | 0.484987  | -0.468020 |
| 15            | 6             | 0           | 0.341900                | -1.124796 | -0.907182 |
| 16            | 6             | 0           | -0.830495               | -1.417014 | -0.922598 |
| 17            | 6             | 0           | 1.198825                | -2.434784 | 1.771964  |
| 18            | 8             | 0           | 1.060467                | -3.496482 | 1.341856  |
| 19            | 8             | 0           | 1.329856                | -1.383920 | 2.236181  |
| 20            | 6             | 0           | -0.852968               | 1.923038  | 0.442764  |
| 21            | 7             | 0           | -0.395507               | 1.074442  | 1.375347  |
| 22            | 1             | 0           | 0.514124                | 0.667244  | 1.186156  |

|    |   |   |           |           |           |
|----|---|---|-----------|-----------|-----------|
| 23 | 7 | 0 | -0.016050 | 2.316268  | -0.509236 |
| 24 | 7 | 0 | -2.112853 | 2.366858  | 0.493284  |
| 25 | 6 | 0 | -1.296350 | 0.417339  | 2.306048  |
| 26 | 6 | 0 | -3.036139 | 2.014850  | 1.573832  |
| 27 | 6 | 0 | -2.309178 | 1.443744  | 2.775232  |
| 28 | 6 | 0 | -2.667052 | 3.216877  | -0.561722 |
| 29 | 6 | 0 | -0.401804 | 3.251118  | -1.551831 |
| 30 | 6 | 0 | -1.879506 | 3.081766  | -1.850840 |
| 31 | 1 | 0 | 0.206113  | 3.038140  | -2.428988 |
| 32 | 1 | 0 | -0.192947 | 4.277166  | -1.236780 |
| 33 | 1 | 0 | -2.047030 | 2.096062  | -2.290187 |
| 34 | 1 | 0 | -2.218552 | 3.833081  | -2.562014 |
| 35 | 1 | 0 | -3.703428 | 2.907194  | -0.709814 |
| 36 | 1 | 0 | -2.675888 | 4.254399  | -0.216658 |
| 37 | 1 | 0 | -3.581005 | 2.920648  | 1.844260  |
| 38 | 1 | 0 | -3.762745 | 1.293711  | 1.186210  |
| 39 | 1 | 0 | -3.033073 | 0.990514  | 3.450179  |
| 40 | 1 | 0 | -1.789963 | 2.238354  | 3.313069  |
| 41 | 1 | 0 | -1.797235 | -0.430373 | 1.823922  |
| 42 | 1 | 0 | -0.703327 | 0.038281  | 3.134404  |
| 43 | 1 | 0 | 0.874509  | 1.775301  | -0.568484 |
| 44 | 6 | 0 | -2.214595 | -1.769195 | -0.903106 |
| 45 | 6 | 0 | -2.605276 | -3.112883 | -0.900929 |
| 46 | 6 | 0 | -3.198883 | -0.775261 | -0.865339 |
| 47 | 6 | 0 | -3.949280 | -3.448022 | -0.859732 |
| 48 | 1 | 0 | -1.847152 | -3.884826 | -0.930032 |
| 49 | 6 | 0 | -4.540950 | -1.117762 | -0.821049 |
| 50 | 1 | 0 | -2.896468 | 0.264839  | -0.874402 |
| 51 | 6 | 0 | -4.920592 | -2.454694 | -0.818085 |
| 52 | 1 | 0 | -4.240395 | -4.490603 | -0.858474 |
| 53 | 1 | 0 | -5.292084 | -0.338550 | -0.790479 |
| 54 | 1 | 0 | -5.968907 | -2.721224 | -0.784874 |

---

## TS1

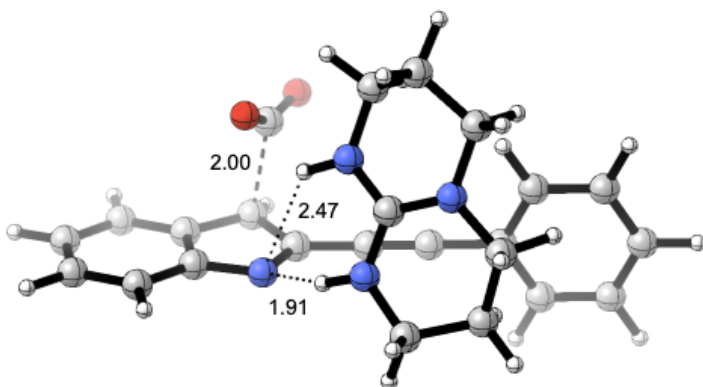

Calculated using M06-2X/def2TZVP in acetonitrile at 373.15 K:

```

HF = -1298.4151163 hartrees
Zero-point correction=          0.444244 (Hartree/Particle)
Thermal correction to Gibbs Free Energy=      0.362764
Sum of electronic and zero-point Energies=    -1297.970873
Sum of electronic and thermal Enthalpies=    -1297.930472
Sum of electronic and thermal Free Energies=  -1298.052352
  
```

Single Points using M06-2X/def2TZVP in the gas phase:

Counterpoise corrected energy = -1298.385468815687

Standard orientation:

| Center<br>Number | Atomic<br>Number | Atomic<br>Type | Coordinates (Angstroms) |           |           |
|------------------|------------------|----------------|-------------------------|-----------|-----------|
|                  |                  |                | X                       | Y         | Z         |
| 1                | 6                | 0              | 3.831043                | -1.071843 | -0.126851 |
| 2                | 6                | 0              | 3.338797                | -0.074732 | -0.995866 |
| 3                | 6                | 0              | 4.200430                | 0.829247  | -1.619709 |
| 4                | 6                | 0              | 5.556315                | 0.707925  | -1.377668 |
| 5                | 6                | 0              | 6.053829                | -0.290574 | -0.524569 |
| 6                | 6                | 0              | 5.202228                | -1.178088 | 0.109642  |
| 7                | 6                | 0              | 2.663476                | -1.736256 | 0.403095  |
| 8                | 6                | 0              | 1.584099                | -1.165312 | -0.351732 |
| 9                | 1                | 0              | 3.811350                | 1.597639  | -2.276405 |
| 10               | 1                | 0              | 6.248965                | 1.391411  | -1.852489 |
| 11               | 1                | 0              | 7.121610                | -0.362090 | -0.360396 |
| 12               | 1                | 0              | 5.593959                | -1.936346 | 0.776946  |
| 13               | 1                | 0              | 2.641209                | -2.731166 | 0.817990  |
| 14               | 7                | 0              | 1.958939                | -0.147461 | -1.114320 |
| 15               | 6                | 0              | 0.204541                | -1.515040 | -0.231458 |
| 16               | 6                | 0              | -0.974595               | -1.745249 | -0.138886 |
| 17               | 6                | 0              | 2.219020                | -0.715425 | 2.062192  |
| 18               | 8                | 0              | 1.873923                | -1.531228 | 2.865204  |
| 19               | 8                | 0              | 2.400865                | 0.455667  | 1.884076  |
| 20               | 6                | 0              | -0.886984               | 1.704477  | -0.264826 |
| 21               | 7                | 0              | -0.020051               | 1.666222  | 0.752416  |
| 22               | 1                | 0              | 0.916561                | 1.324661  | 0.571147  |
| 23               | 7                | 0              | -0.443888               | 1.433166  | -1.490610 |
| 24               | 7                | 0              | -2.164276               | 2.028651  | -0.048858 |
| 25               | 6                | 0              | -0.440514               | 1.837257  | 2.132567  |

|    |   |   |           |           |           |
|----|---|---|-----------|-----------|-----------|
| 26 | 6 | 0 | -2.654850 | 2.498101  | 1.247723  |
| 27 | 6 | 0 | -1.519523 | 2.902476  | 2.167218  |
| 28 | 6 | 0 | -3.172550 | 1.950822  | -1.106117 |
| 29 | 6 | 0 | -1.315600 | 1.442317  | -2.655257 |
| 30 | 6 | 0 | -2.719805 | 1.048314  | -2.236235 |
| 31 | 1 | 0 | -0.906349 | 0.740210  | -3.378810 |
| 32 | 1 | 0 | -1.319323 | 2.435369  | -3.112276 |
| 33 | 1 | 0 | -2.722938 | 0.009189  | -1.901725 |
| 34 | 1 | 0 | -3.410002 | 1.142168  | -3.072945 |
| 35 | 1 | 0 | -4.083662 | 1.561475  | -0.647130 |
| 36 | 1 | 0 | -3.383374 | 2.960553  | -1.469859 |
| 37 | 1 | 0 | -3.316626 | 3.344598  | 1.056177  |
| 38 | 1 | 0 | -3.259377 | 1.704845  | 1.697967  |
| 39 | 1 | 0 | -1.903036 | 3.029286  | 3.177910  |
| 40 | 1 | 0 | -1.094253 | 3.852506  | 1.839986  |
| 41 | 1 | 0 | -0.811731 | 0.892214  | 2.543126  |
| 42 | 1 | 0 | 0.433123  | 2.130306  | 2.708717  |
| 43 | 1 | 0 | 0.474676  | 0.975801  | -1.546551 |
| 44 | 6 | 0 | -2.392332 | -1.919104 | -0.044418 |
| 45 | 6 | 0 | -3.075334 | -2.763764 | -0.922305 |
| 46 | 6 | 0 | -3.111996 | -1.181333 | 0.900125  |
| 47 | 6 | 0 | -4.457484 | -2.855475 | -0.860256 |
| 48 | 1 | 0 | -2.518657 | -3.332869 | -1.655055 |
| 49 | 6 | 0 | -4.493177 | -1.275603 | 0.954634  |
| 50 | 1 | 0 | -2.574295 | -0.540584 | 1.587344  |
| 51 | 6 | 0 | -5.168877 | -2.109762 | 0.071771  |
| 52 | 1 | 0 | -4.981694 | -3.508668 | -1.545549 |
| 53 | 1 | 0 | -5.042590 | -0.698779 | 1.687547  |
| 54 | 1 | 0 | -6.247852 | -2.181549 | 0.112821  |

---

## Int4

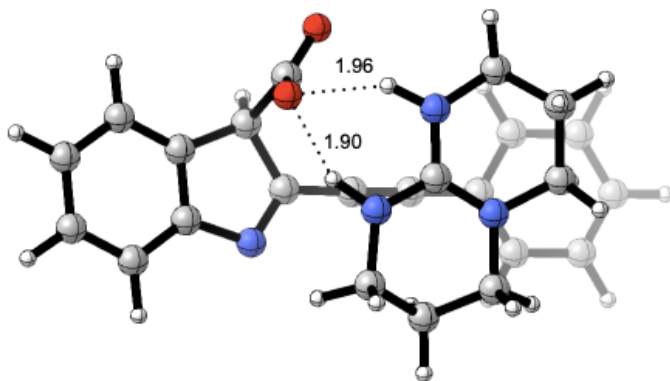

Calculated using M06-2X/def2TZVP in acetonitrile at 373.15 K:

```
HF = -1298.4345107 hartrees
Zero-point correction=                0.446912 (Hartree/Particle)
Thermal correction to Gibbs Free Energy= 0.367612
Sum of electronic and zero-point Energies= -1297.987598
Sum of electronic and thermal Enthalpies= -1297.947517
Sum of electronic and thermal Free Energies= -1298.066899
```

Single Points using M06-2X/def2TZVP in the gas phase:

```
Counterpoise corrected energy = -1298.400829386480
```

Standard orientation:

| Center Number | Atomic Number | Atomic Type | Coordinates (Angstroms) |           |           |
|---------------|---------------|-------------|-------------------------|-----------|-----------|
|               |               |             | X                       | Y         | Z         |
| 1             | 6             | 0           | 3.788757                | -0.808072 | -0.412352 |
| 2             | 6             | 0           | 3.638083                | 0.446200  | -1.011369 |
| 3             | 6             | 0           | 4.701356                | 1.325198  | -1.140409 |
| 4             | 6             | 0           | 5.938466                | 0.916261  | -0.654037 |
| 5             | 6             | 0           | 6.096696                | -0.333687 | -0.058711 |
| 6             | 6             | 0           | 5.019611                | -1.208949 | 0.069256  |
| 7             | 6             | 0           | 2.448254                | -1.467448 | -0.419831 |
| 8             | 6             | 0           | 1.645988                | -0.398658 | -1.135005 |
| 9             | 1             | 0           | 4.566919                | 2.293965  | -1.604099 |
| 10            | 1             | 0           | 6.791050                | 1.577766  | -0.738029 |
| 11            | 1             | 0           | 7.070650                | -0.628070 | 0.310250  |
| 12            | 1             | 0           | 5.149714                | -2.176758 | 0.537885  |
| 13            | 1             | 0           | 2.419647                | -2.413282 | -0.961242 |
| 14            | 7             | 0           | 2.309588                | 0.664218  | -1.439635 |
| 15            | 6             | 0           | 0.250932                | -0.532191 | -1.373238 |
| 16            | 6             | 0           | -0.940943               | -0.656019 | -1.504199 |
| 17            | 6             | 0           | 1.804018                | -1.693698 | 0.986870  |
| 18            | 8             | 0           | 1.178539                | -2.745216 | 1.154241  |
| 19            | 8             | 0           | 1.929299                | -0.745376 | 1.804920  |
| 20            | 6             | 0           | -0.933536               | 0.832340  | 1.470944  |
| 21            | 7             | 0           | -0.901584               | -0.348931 | 2.092255  |
| 22            | 1             | 0           | 0.022145                | -0.744639 | 2.256280  |
| 23            | 7             | 0           | 0.224061                | 1.451966  | 1.233107  |
| 24            | 7             | 0           | -2.094117               | 1.383295  | 1.111447  |
| 25            | 6             | 0           | -2.095107               | -1.136969 | 2.343087  |
| 26            | 6             | 0           | -3.382555               | 0.777710  | 1.453576  |

|    |   |   |           |           |           |
|----|---|---|-----------|-----------|-----------|
| 27 | 6 | 0 | -3.249434 | -0.190845 | 2.612363  |
| 28 | 6 | 0 | -2.147894 | 2.640234  | 0.365310  |
| 29 | 6 | 0 | 0.317944  | 2.730605  | 0.545626  |
| 30 | 6 | 0 | -0.860224 | 2.877654  | -0.398628 |
| 31 | 1 | 0 | 1.258811  | 2.739469  | -0.001539 |
| 32 | 1 | 0 | 0.330603  | 3.547423  | 1.272033  |
| 33 | 1 | 0 | -0.764314 | 2.146485  | -1.203633 |
| 34 | 1 | 0 | -0.874617 | 3.874742  | -0.835552 |
| 35 | 1 | 0 | -2.996341 | 2.568089  | -0.317466 |
| 36 | 1 | 0 | -2.347443 | 3.461161  | 1.060382  |
| 37 | 1 | 0 | -4.062063 | 1.591782  | 1.709356  |
| 38 | 1 | 0 | -3.780858 | 0.272253  | 0.567898  |
| 39 | 1 | 0 | -4.178931 | -0.746456 | 2.725453  |
| 40 | 1 | 0 | -3.061726 | 0.356389  | 3.537768  |
| 41 | 1 | 0 | -2.320016 | -1.776907 | 1.485680  |
| 42 | 1 | 0 | -1.897963 | -1.776728 | 3.200773  |
| 43 | 1 | 0 | 1.061991  | 0.897266  | 1.403764  |
| 44 | 6 | 0 | -2.360076 | -0.751876 | -1.621985 |
| 45 | 6 | 0 | -3.093614 | 0.311728  | -2.157377 |
| 46 | 6 | 0 | -3.029073 | -1.893338 | -1.168734 |
| 47 | 6 | 0 | -4.476128 | 0.238774  | -2.218481 |
| 48 | 1 | 0 | -2.573508 | 1.187466  | -2.523972 |
| 49 | 6 | 0 | -4.411871 | -1.957187 | -1.231675 |
| 50 | 1 | 0 | -2.456470 | -2.720743 | -0.769662 |
| 51 | 6 | 0 | -5.137227 | -0.891380 | -1.751509 |
| 52 | 1 | 0 | -5.038603 | 1.066274  | -2.630578 |
| 53 | 1 | 0 | -4.924447 | -2.840890 | -0.875089 |
| 54 | 1 | 0 | -6.217105 | -0.943472 | -1.797130 |

---

## Int4a

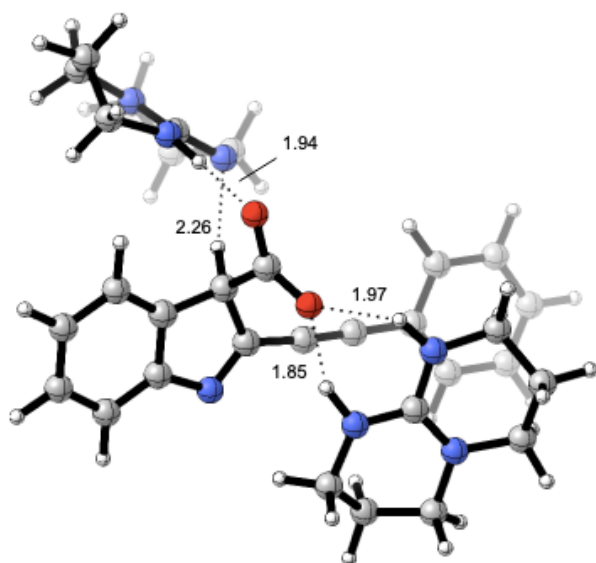

Calculated using M06-2X/def2TZVP in acetonitrile at 373.15 K:

```
HF = -1737.2480143 hartrees
Zero-point correction=          0.655752 (Hartree/Particle)
Thermal correction to Gibbs Free Energy=    0.553736
Sum of electronic and zero-point Energies=  -1736.592262
Sum of electronic and thermal Free Energies= -1736.694278
```

Standard orientation:

| Center Number | Atomic Number | Atomic Type | Coordinates (Angstroms) |           |           |
|---------------|---------------|-------------|-------------------------|-----------|-----------|
|               |               |             | X                       | Y         | Z         |
| 1             | 6             | 0           | 1.949021                | 2.182612  | -0.179786 |
| 2             | 6             | 0           | 1.283646                | 2.803055  | -1.242623 |
| 3             | 6             | 0           | 1.700072                | 4.027585  | -1.740808 |
| 4             | 6             | 0           | 2.803125                | 4.628246  | -1.142185 |
| 5             | 6             | 0           | 3.458843                | 4.021194  | -0.072899 |
| 6             | 6             | 0           | 3.034104                | 2.789103  | 0.421606  |
| 7             | 6             | 0           | 1.231305                | 0.898963  | 0.097562  |
| 8             | 6             | 0           | 0.153494                | 0.978001  | -0.948856 |
| 9             | 1             | 0           | 1.179982                | 4.496771  | -2.566018 |
| 10            | 1             | 0           | 3.154067                | 5.584553  | -1.508081 |
| 11            | 1             | 0           | 4.308566                | 4.514997  | 0.380729  |
| 12            | 1             | 0           | 3.531188                | 2.321313  | 1.262274  |
| 13            | 1             | 0           | 1.850908                | 0.007053  | -0.074522 |
| 14            | 7             | 0           | 0.187474                | 2.032365  | -1.693332 |
| 15            | 6             | 0           | -0.816629               | -0.053091 | -1.075151 |
| 16            | 6             | 0           | -1.610814               | -0.958621 | -1.038623 |
| 17            | 6             | 0           | 0.741333                | 0.835020  | 1.568913  |
| 18            | 8             | 0           | 1.597862                | 0.507203  | 2.403921  |
| 19            | 8             | 0           | -0.450970               | 1.154766  | 1.798294  |
| 20            | 6             | 0           | -3.578338               | 1.032590  | 0.800758  |
| 21            | 7             | 0           | -3.162684               | 0.165656  | 1.728089  |
| 22            | 1             | 0           | -2.190767               | 0.249097  | 2.013236  |
| 23            | 7             | 0           | -2.739513               | 1.989213  | 0.407226  |
| 24            | 7             | 0           | -4.811158               | 0.945397  | 0.293515  |



|    |   |   |           |           |           |
|----|---|---|-----------|-----------|-----------|
| 25 | 6 | 0 | -3.997578 | -0.929423 | 2.192457  |
| 26 | 6 | 0 | -5.822686 | 0.040079  | 0.840350  |
| 27 | 6 | 0 | -5.437489 | -0.452676 | 2.221406  |
| 28 | 6 | 0 | -5.236913 | 1.780371  | -0.828912 |
| 29 | 6 | 0 | -3.061817 | 2.938707  | -0.646009 |
| 30 | 6 | 0 | -4.042028 | 2.294533  | -1.607063 |
| 31 | 1 | 0 | -2.132168 | 3.198344  | -1.149093 |
| 32 | 1 | 0 | -3.489559 | 3.848686  | -0.216973 |
| 33 | 1 | 0 | -3.547384 | 1.467963  | -2.122602 |
| 34 | 1 | 0 | -4.376201 | 3.013344  | -2.353258 |
| 35 | 1 | 0 | -5.875567 | 1.161463  | -1.461768 |
| 36 | 1 | 0 | -5.843397 | 2.609262  | -0.452281 |
| 37 | 1 | 0 | -6.763895 | 0.591119  | 0.874634  |
| 38 | 1 | 0 | -5.949383 | -0.800346 | 0.152253  |
| 39 | 1 | 0 | -6.101466 | -1.264860 | 2.512401  |
| 40 | 1 | 0 | -5.539852 | 0.352837  | 2.950409  |
| 41 | 1 | 0 | -3.900890 | -1.796800 | 1.531221  |
| 42 | 1 | 0 | -3.653196 | -1.215985 | 3.183728  |
| 43 | 1 | 0 | -1.782549 | 1.898986  | 0.754765  |
| 44 | 6 | 0 | -2.561795 | -2.015674 | -0.919539 |
| 45 | 6 | 0 | -3.838176 | -1.892496 | -1.476010 |
| 46 | 6 | 0 | -2.231226 | -3.166106 | -0.195037 |
| 47 | 6 | 0 | -4.771057 | -2.902873 | -1.300045 |
| 48 | 1 | 0 | -4.090273 | -1.004123 | -2.041623 |
| 49 | 6 | 0 | -3.169327 | -4.171256 | -0.025515 |
| 50 | 1 | 0 | -1.242623 | -3.255802 | 0.236151  |
| 51 | 6 | 0 | -4.440830 | -4.040540 | -0.572777 |
| 52 | 1 | 0 | -5.758625 | -2.801279 | -1.731441 |
| 53 | 1 | 0 | -2.909468 | -5.056797 | 0.539355  |
| 54 | 1 | 0 | -5.173147 | -4.825207 | -0.435260 |
| 55 | 6 | 0 | 4.072125  | -1.531169 | 0.337079  |
| 56 | 7 | 0 | 2.912046  | -1.986285 | -0.019040 |
| 57 | 7 | 0 | 4.124800  | -0.617369 | 1.356519  |
| 58 | 7 | 0 | 5.271245  | -1.913934 | -0.205692 |
| 59 | 6 | 0 | 2.896915  | -3.016650 | -1.040651 |
| 60 | 6 | 0 | 5.318270  | -2.747511 | -1.399314 |
| 61 | 6 | 0 | 3.970849  | -2.784473 | -2.092526 |
| 62 | 6 | 0 | 6.569643  | -1.426283 | 0.239426  |
| 63 | 6 | 0 | 5.315183  | 0.151485  | 1.643469  |
| 64 | 6 | 0 | 6.503487  | -0.790402 | 1.613665  |
| 65 | 1 | 0 | 5.195233  | 0.611195  | 2.624391  |
| 66 | 1 | 0 | 5.472215  | 0.957683  | 0.913624  |
| 67 | 1 | 0 | 6.372287  | -1.556111 | 2.380424  |
| 68 | 1 | 0 | 7.433833  | -0.259024 | 1.812404  |
| 69 | 1 | 0 | 7.262895  | -2.272108 | 0.240043  |
| 70 | 1 | 0 | 6.950944  | -0.698750 | -0.488078 |
| 71 | 1 | 0 | 6.084042  | -2.338141 | -2.064423 |
| 72 | 1 | 0 | 5.635134  | -3.760444 | -1.125947 |
| 73 | 1 | 0 | 3.968841  | -3.567607 | -2.851526 |
| 74 | 1 | 0 | 3.783563  | -1.829246 | -2.589429 |
| 75 | 1 | 0 | 3.046910  | -4.009754 | -0.593500 |
| 76 | 1 | 0 | 1.907494  | -3.031476 | -1.502519 |
| 77 | 1 | 0 | 3.223428  | -0.275669 | 1.683435  |

---

# TS-PT

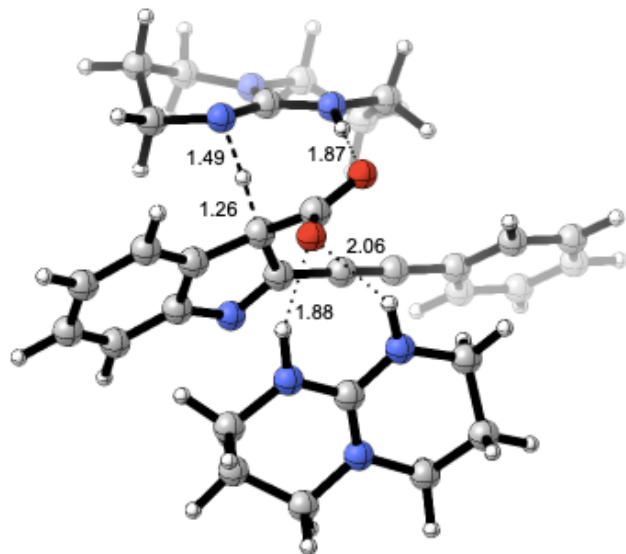

Calculated using M06-2X/def2TZVP in acetonitrile at 373.15 K:

HF = -1737.2418285 hartrees  
 Zero-point correction= 0.651269 (Hartree/Particle)  
 Thermal correction to Gibbs Free Energy= 0.553061  
 Sum of electronic and zero-point Energies= -1736.590560  
 Sum of electronic and thermal Free Energies= -1736.688767

Standard orientation:

| Center Number | Atomic Number | Atomic Type | Coordinates (Angstroms) |           |           |
|---------------|---------------|-------------|-------------------------|-----------|-----------|
|               |               |             | X                       | Y         | Z         |
| 1             | 6             | 0           | -1.416802               | -2.362456 | -0.294810 |
| 2             | 6             | 0           | -1.525698               | -2.159850 | 1.092574  |
| 3             | 6             | 0           | -2.275363               | -3.017162 | 1.894076  |
| 4             | 6             | 0           | -2.936429               | -4.069849 | 1.280117  |
| 5             | 6             | 0           | -2.846832               | -4.265761 | -0.103398 |
| 6             | 6             | 0           | -2.082017               | -3.422847 | -0.899989 |
| 7             | 6             | 0           | -0.481888               | -1.346595 | -0.787322 |
| 8             | 6             | 0           | -0.287058               | -0.522928 | 0.418595  |
| 9             | 1             | 0           | -2.344964               | -2.852100 | 2.962332  |
| 10            | 1             | 0           | -3.536728               | -4.746214 | 1.875222  |
| 11            | 1             | 0           | -3.383005               | -5.089250 | -0.558104 |
| 12            | 1             | 0           | -2.014673               | -3.580472 | -1.969085 |
| 13            | 1             | 0           | 0.605479                | -1.980389 | -0.831898 |
| 14            | 7             | 0           | -0.833238               | -1.020148 | 1.500377  |
| 15            | 6             | 0           | 0.459809                | 0.690908  | 0.467504  |
| 16            | 6             | 0           | 1.069124                | 1.730019  | 0.521717  |
| 17            | 6             | 0           | -0.593032               | -0.668886 | -2.141991 |
| 18            | 8             | 0           | 0.413450                | -0.054780 | -2.553347 |
| 19            | 8             | 0           | -1.700480               | -0.737051 | -2.738772 |
| 20            | 6             | 0           | -3.141415               | 1.272156  | -0.505395 |
| 21            | 7             | 0           | -2.297869               | 1.815567  | -1.390794 |
| 22            | 1             | 0           | -1.990311               | 1.216096  | -2.147782 |
| 23            | 7             | 0           | -3.508581               | 0.003183  | -0.677995 |
| 24            | 7             | 0           | -3.607187               | 1.992719  | 0.515417  |
| 25            | 6             | 0           | -1.785657               | 3.169459  | -1.266625 |

|    |   |   |           |           |           |
|----|---|---|-----------|-----------|-----------|
| 26 | 6 | 0 | -3.288699 | 3.411975  | 0.677050  |
| 27 | 6 | 0 | -2.858323 | 4.035729  | -0.635570 |
| 28 | 6 | 0 | -4.478553 | 1.406457  | 1.535058  |
| 29 | 6 | 0 | -4.427563 | -0.685453 | 0.215188  |
| 30 | 6 | 0 | -4.299604 | -0.096944 | 1.607257  |
| 31 | 1 | 0 | -4.163765 | -1.742458 | 0.207482  |
| 32 | 1 | 0 | -5.452985 | -0.583109 | -0.150532 |
| 33 | 1 | 0 | -3.311915 | -0.329227 | 2.009235  |
| 34 | 1 | 0 | -5.052098 | -0.521894 | 2.269819  |
| 35 | 1 | 0 | -4.214571 | 1.871102  | 2.485683  |
| 36 | 1 | 0 | -5.516017 | 1.669214  | 1.309076  |
| 37 | 1 | 0 | -4.186008 | 3.900169  | 1.058980  |
| 38 | 1 | 0 | -2.503994 | 3.514388  | 1.432121  |
| 39 | 1 | 0 | -2.478065 | 5.039246  | -0.452703 |
| 40 | 1 | 0 | -3.712665 | 4.108509  | -1.310697 |
| 41 | 1 | 0 | -0.880570 | 3.175290  | -0.652738 |
| 42 | 1 | 0 | -1.524506 | 3.520727  | -2.262633 |
| 43 | 1 | 0 | -3.028704 | -0.506623 | -1.424462 |
| 44 | 6 | 0 | 1.799655  | 2.957280  | 0.559068  |
| 45 | 6 | 0 | 2.022007  | 3.674605  | -0.621887 |
| 46 | 6 | 0 | 2.299023  | 3.451719  | 1.768264  |
| 47 | 6 | 0 | 2.729483  | 4.865247  | -0.589578 |
| 48 | 1 | 0 | 1.636121  | 3.287968  | -1.557338 |
| 49 | 6 | 0 | 3.007936  | 4.642400  | 1.791222  |
| 50 | 1 | 0 | 2.126239  | 2.896112  | 2.680743  |
| 51 | 6 | 0 | 3.223885  | 5.351126  | 0.615481  |
| 52 | 1 | 0 | 2.897547  | 5.413945  | -1.506975 |
| 53 | 1 | 0 | 3.392789  | 5.018767  | 2.730086  |
| 54 | 1 | 0 | 3.778349  | 6.280155  | 0.637699  |
| 55 | 6 | 0 | 2.887818  | -1.899896 | -0.540064 |
| 56 | 7 | 0 | 1.892542  | -2.732030 | -0.750484 |
| 57 | 7 | 0 | 2.890055  | -0.739491 | -1.235702 |
| 58 | 7 | 0 | 3.902366  | -2.134011 | 0.328816  |
| 59 | 6 | 0 | 1.826821  | -3.916988 | 0.087066  |
| 60 | 6 | 0 | 4.079194  | -3.434071 | 0.966414  |
| 61 | 6 | 0 | 3.217753  | -4.491493 | 0.303953  |
| 62 | 6 | 0 | 4.902119  | -1.126771 | 0.659452  |
| 63 | 6 | 0 | 3.840366  | 0.332249  | -1.013588 |
| 64 | 6 | 0 | 4.365462  | 0.268264  | 0.407721  |
| 65 | 1 | 0 | 3.330252  | 1.276810  | -1.201077 |
| 66 | 1 | 0 | 4.675764  | 0.261287  | -1.718383 |
| 67 | 1 | 0 | 3.552847  | 0.482545  | 1.106316  |
| 68 | 1 | 0 | 5.155171  | 1.003384  | 0.560090  |
| 69 | 1 | 0 | 5.157568  | -1.257030 | 1.713365  |
| 70 | 1 | 0 | 5.814602  | -1.299026 | 0.077019  |
| 71 | 1 | 0 | 5.138064  | -3.698125 | 0.901909  |
| 72 | 1 | 0 | 3.827954  | -3.346866 | 2.028884  |
| 73 | 1 | 0 | 3.190065  | -5.383475 | 0.929751  |
| 74 | 1 | 0 | 3.642987  | -4.767987 | -0.663440 |
| 75 | 1 | 0 | 1.372935  | -3.683835 | 1.061048  |
| 76 | 1 | 0 | 1.176478  | -4.645747 | -0.398657 |
| 77 | 1 | 0 | 2.020814  | -0.517632 | -1.726230 |

---

## Int5

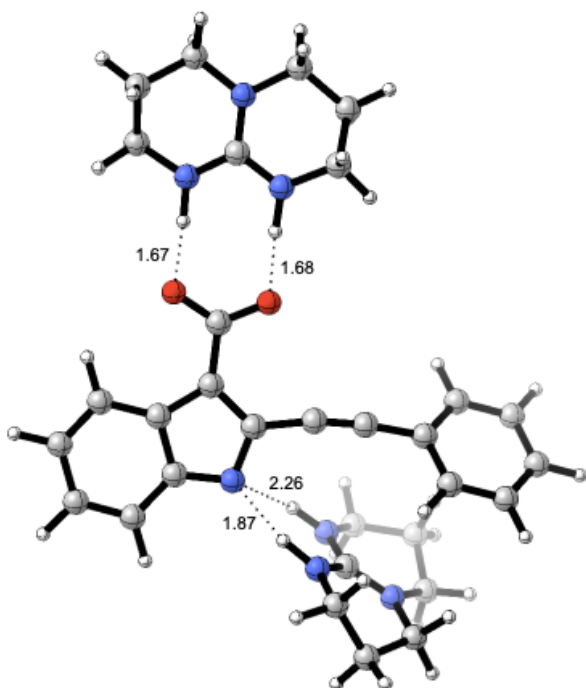

Calculated using M06-2X/def2TZVP in acetonitrile at 373.15 K:

HF = -1737.2778047 hartrees  
 Zero-point correction= 0.655258 (Hartree/Particle)  
 Thermal correction to Gibbs Free Energy= 0.550874  
 Sum of electronic and zero-point Energies= -1736.622547  
 Sum of electronic and thermal Free Energies= -1736.726931

Standard orientation:

| Center Number | Atomic Number | Atomic Type | Coordinates (Angstroms) |           |           |
|---------------|---------------|-------------|-------------------------|-----------|-----------|
|               |               |             | X                       | Y         | Z         |
| 1             | 6             | 0           | 0.620319                | -3.201499 | -0.007889 |
| 2             | 6             | 0           | -0.793321               | -3.384966 | 0.000040  |
| 3             | 6             | 0           | -1.353251               | -4.668524 | 0.094876  |
| 4             | 6             | 0           | -0.506487               | -5.753458 | 0.179681  |
| 5             | 6             | 0           | 0.893342                | -5.581295 | 0.171004  |
| 6             | 6             | 0           | 1.460373                | -4.326105 | 0.079220  |
| 7             | 6             | 0           | 0.826091                | -1.792934 | -0.113955 |
| 8             | 6             | 0           | -0.464439               | -1.250950 | -0.163631 |
| 9             | 1             | 0           | -2.430096               | -4.794774 | 0.100059  |
| 10            | 1             | 0           | -0.917987               | -6.752770 | 0.253790  |
| 11            | 1             | 0           | 1.531970                | -6.454026 | 0.236657  |
| 12            | 1             | 0           | 2.534310                | -4.198048 | 0.072073  |
| 13            | 7             | 0           | -1.447843               | -2.190613 | -0.094916 |
| 14            | 6             | 0           | -0.886529               | 0.109119  | -0.252361 |
| 15            | 6             | 0           | -1.438845               | 1.181238  | -0.285339 |
| 16            | 6             | 0           | 2.113702                | -1.069788 | -0.156311 |
| 17            | 8             | 0           | 3.171261                | -1.759424 | -0.086738 |
| 18            | 8             | 0           | 2.099705                | 0.188350  | -0.256725 |
| 19            | 6             | 0           | 5.601872                | 0.850692  | -0.080023 |
| 20            | 7             | 0           | 4.495115                | 1.470982  | -0.485029 |
| 21            | 1             | 0           | 3.593070                | 0.950569  | -0.413753 |

|    |   |   |           |           |           |
|----|---|---|-----------|-----------|-----------|
| 22 | 7 | 0 | 5.510506  | -0.428779 | 0.276726  |
| 23 | 7 | 0 | 6.775613  | 1.496219  | -0.032894 |
| 24 | 6 | 0 | 4.500814  | 2.850749  | -0.934044 |
| 25 | 6 | 0 | 6.885167  | 2.929059  | -0.300741 |
| 26 | 6 | 0 | 5.545869  | 3.623274  | -0.150735 |
| 27 | 6 | 0 | 8.027303  | 0.811937  | 0.285923  |
| 28 | 6 | 0 | 6.650369  | -1.178211 | 0.771027  |
| 29 | 6 | 0 | 7.907371  | -0.684944 | 0.078933  |
| 30 | 1 | 0 | 6.470654  | -2.231508 | 0.562942  |
| 31 | 1 | 0 | 6.747862  | -1.062465 | 1.855033  |
| 32 | 1 | 0 | 7.845016  | -0.909013 | -0.987537 |
| 33 | 1 | 0 | 8.790285  | -1.178308 | 0.482193  |
| 34 | 1 | 0 | 8.798730  | 1.229743  | -0.363206 |
| 35 | 1 | 0 | 8.303831  | 1.038707  | 1.320042  |
| 36 | 1 | 0 | 7.610928  | 3.335804  | 0.405399  |
| 37 | 1 | 0 | 7.285211  | 3.073487  | -1.308845 |
| 38 | 1 | 0 | 5.624704  | 4.646052  | -0.515782 |
| 39 | 1 | 0 | 5.259246  | 3.654512  | 0.902101  |
| 40 | 1 | 0 | 4.716429  | 2.907261  | -2.005615 |
| 41 | 1 | 0 | 3.504040  | 3.257557  | -0.772694 |
| 42 | 1 | 0 | 4.593800  | -0.910327 | 0.135891  |
| 43 | 6 | 0 | -4.452392 | -0.476766 | 0.258509  |
| 44 | 7 | 0 | -3.709171 | -0.538855 | 1.366340  |
| 45 | 1 | 0 | -2.843160 | -1.060247 | 1.282686  |
| 46 | 7 | 0 | -4.050191 | -1.174812 | -0.801961 |
| 47 | 7 | 0 | -5.570332 | 0.252368  | 0.229783  |
| 48 | 6 | 0 | -4.022329 | 0.195221  | 2.581593  |
| 49 | 1 | 0 | -4.623651 | -0.425226 | 3.251441  |
| 50 | 1 | 0 | -3.084409 | 0.425277  | 3.083454  |
| 51 | 6 | 0 | -5.959898 | 1.121370  | 1.340155  |
| 52 | 1 | 0 | -6.377417 | 2.029793  | 0.901737  |
| 53 | 1 | 0 | -6.749637 | 0.631048  | 1.916214  |
| 54 | 6 | 0 | -4.772447 | 1.463462  | 2.218053  |
| 55 | 1 | 0 | -4.105763 | 2.143939  | 1.685355  |
| 56 | 1 | 0 | -5.122454 | 1.963229  | 3.119896  |
| 57 | 6 | 0 | -6.421815 | 0.290687  | -0.956189 |
| 58 | 1 | 0 | -7.452163 | 0.381386  | -0.611181 |
| 59 | 1 | 0 | -6.184664 | 1.187942  | -1.537801 |
| 60 | 6 | 0 | -4.768446 | -1.178121 | -2.064690 |
| 61 | 1 | 0 | -4.594916 | -2.138627 | -2.546666 |
| 62 | 1 | 0 | -4.384608 | -0.398203 | -2.729806 |
| 63 | 6 | 0 | -6.245156 | -0.959899 | -1.795167 |
| 64 | 1 | 0 | -6.789042 | -0.850617 | -2.731682 |
| 65 | 1 | 0 | -6.650334 | -1.821081 | -1.260951 |
| 66 | 6 | 0 | -2.228699 | 2.372065  | -0.274193 |
| 67 | 6 | 0 | -3.400677 | 2.421908  | -1.038568 |
| 68 | 6 | 0 | -1.906034 | 3.457867  | 0.545614  |
| 69 | 6 | 0 | -4.243701 | 3.518572  | -0.961342 |
| 70 | 1 | 0 | -3.642423 | 1.586711  | -1.684639 |
| 71 | 6 | 0 | -2.753439 | 4.553523  | 0.617457  |
| 72 | 1 | 0 | -1.000873 | 3.425400  | 1.137776  |
| 73 | 6 | 0 | -3.926834 | 4.584617  | -0.126905 |
| 74 | 1 | 0 | -5.149334 | 3.544484  | -1.554510 |
| 75 | 1 | 0 | -2.499439 | 5.384817  | 1.262265  |
| 76 | 1 | 0 | -4.588030 | 5.438859  | -0.063168 |
| 77 | 1 | 0 | -3.140400 | -1.655687 | -0.697817 |

---

## Int6

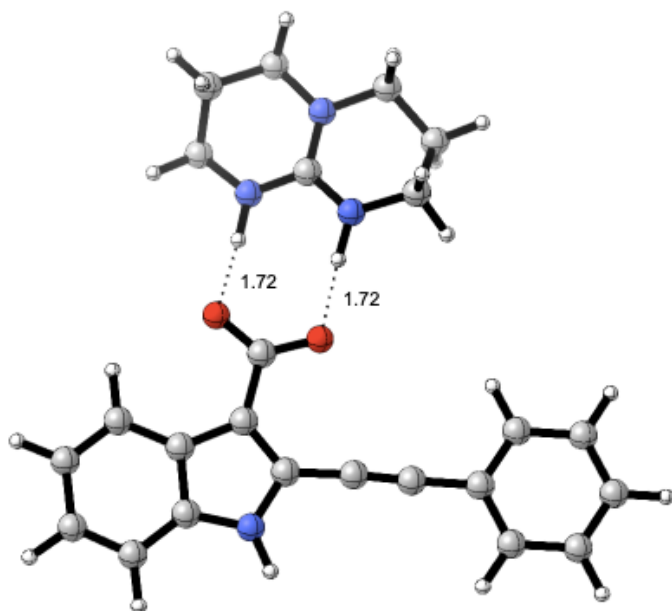

Calculated using M06-2X/def2TZVP in acetonitrile at 373.15 K:

```
HF = -1298.4530985 hartrees
Zero-point correction= 0.446374 (Hartree/Particle)
Thermal correction to Gibbs Free Energy= 0.361519
Sum of electronic and zero-point Energies= -1298.006724
Sum of electronic and thermal Enthalpies= -1297.965995
Sum of electronic and thermal Free Energies= -1298.091580
```

Single Points using M06-2X/def2TZVP in the gas phase:

```
Counterpoise corrected energy = -1298.419130951713
```

Standard orientation:

| Center Number | Atomic Number | Atomic Type | Coordinates (Angstroms) |           |           |
|---------------|---------------|-------------|-------------------------|-----------|-----------|
|               |               |             | X                       | Y         | Z         |
| 1             | 6             | 0           | -1.562885               | 3.244607  | 0.028756  |
| 2             | 6             | 0           | -2.966303               | 3.398924  | 0.058356  |
| 3             | 6             | 0           | -3.586874               | 4.648267  | 0.093547  |
| 4             | 6             | 0           | -2.769122               | 5.759251  | 0.098563  |
| 5             | 6             | 0           | -1.368059               | 5.632899  | 0.069466  |
| 6             | 6             | 0           | -0.758916               | 4.395682  | 0.035123  |
| 7             | 6             | 0           | -1.292343               | 1.834924  | -0.000489 |
| 8             | 6             | 0           | -2.521499               | 1.201952  | 0.011389  |
| 9             | 1             | 0           | -4.665137               | 4.738147  | 0.116396  |
| 10            | 1             | 0           | -3.212845               | 6.746179  | 0.126219  |
| 11            | 1             | 0           | -0.759640               | 6.528331  | 0.074323  |
| 12            | 1             | 0           | 0.316606                | 4.295141  | 0.012376  |
| 13            | 7             | 0           | -3.518980               | 2.146575  | 0.046548  |
| 14            | 6             | 0           | -2.865413               | -0.171454 | -0.009874 |
| 15            | 6             | 0           | -3.226504               | -1.321307 | -0.028865 |
| 16            | 6             | 0           | 0.046926                | 1.180520  | -0.035853 |
| 17            | 8             | 0           | 1.045836                | 1.943398  | -0.074647 |

|    |   |   |           |           |           |
|----|---|---|-----------|-----------|-----------|
| 18 | 8 | 0 | 0.092609  | -0.073926 | -0.024028 |
| 19 | 6 | 0 | 3.658494  | -0.552010 | 0.001874  |
| 20 | 7 | 0 | 2.561243  | -1.261205 | 0.261738  |
| 21 | 1 | 0 | 1.643937  | -0.788019 | 0.158139  |
| 22 | 7 | 0 | 3.519592  | 0.740030  | -0.291210 |
| 23 | 7 | 0 | 4.869578  | -1.122970 | 0.033206  |
| 24 | 6 | 0 | 2.610590  | -2.663160 | 0.635234  |
| 25 | 6 | 0 | 5.045172  | -2.558483 | 0.245883  |
| 26 | 6 | 0 | 3.776820  | -3.323517 | -0.075735 |
| 27 | 6 | 0 | 6.099698  | -0.347208 | -0.120151 |
| 28 | 6 | 0 | 4.650306  | 1.584408  | -0.630681 |
| 29 | 6 | 0 | 5.863278  | 1.124355  | 0.155749  |
| 30 | 1 | 0 | 4.384226  | 2.610788  | -0.384625 |
| 31 | 1 | 0 | 4.856688  | 1.538490  | -1.704283 |
| 32 | 1 | 0 | 5.683240  | 1.278665  | 1.221107  |
| 33 | 1 | 0 | 6.746777  | 1.693480  | -0.128728 |
| 34 | 1 | 0 | 6.829201  | -0.757068 | 0.580068  |
| 35 | 1 | 0 | 6.489965  | -0.494391 | -1.131503 |
| 36 | 1 | 0 | 5.864900  | -2.882524 | -0.397240 |
| 37 | 1 | 0 | 5.347711  | -2.730677 | 1.283252  |
| 38 | 1 | 0 | 3.886576  | -4.358519 | 0.243827  |
| 39 | 1 | 0 | 3.598639  | -3.312607 | -1.152436 |
| 40 | 1 | 0 | 2.720069  | -2.769773 | 1.718787  |
| 41 | 1 | 0 | 1.663481  | -3.116905 | 0.348185  |
| 42 | 1 | 0 | 2.571461  | 1.155523  | -0.224975 |
| 43 | 6 | 0 | -3.608723 | -2.697097 | -0.056149 |
| 44 | 6 | 0 | -4.957160 | -3.062700 | 0.003692  |
| 45 | 6 | 0 | -2.629425 | -3.692208 | -0.145604 |
| 46 | 6 | 0 | -5.315349 | -4.400852 | -0.026354 |
| 47 | 1 | 0 | -5.714057 | -2.292613 | 0.074659  |
| 48 | 6 | 0 | -2.996539 | -5.027564 | -0.175024 |
| 49 | 1 | 0 | -1.586643 | -3.405947 | -0.192664 |
| 50 | 6 | 0 | -4.338381 | -5.385319 | -0.115520 |
| 51 | 1 | 0 | -6.360897 | -4.676585 | 0.019801  |
| 52 | 1 | 0 | -2.233543 | -5.791788 | -0.246334 |
| 53 | 1 | 0 | -4.622279 | -6.429478 | -0.138785 |
| 54 | 1 | 0 | -4.502767 | 1.931905  | 0.057856  |

---

## TS2

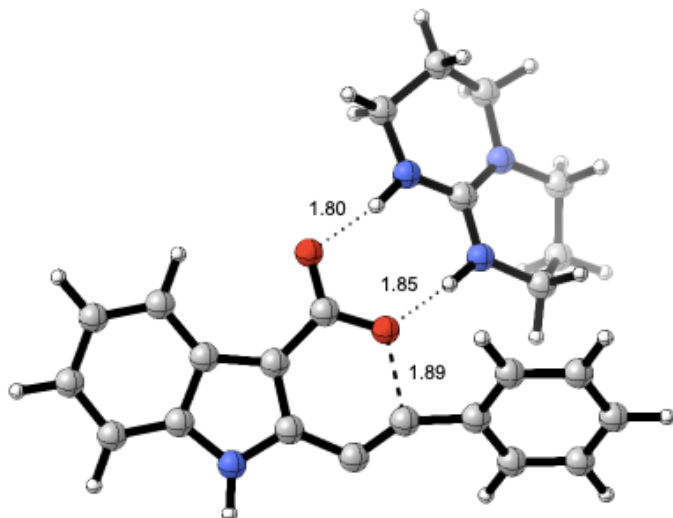

Calculated using M06-2X/def2TZVP in acetonitrile at 373.15 K:

```
HF = -1298.4136628 hartrees
Zero-point correction= 0.446948 (Hartree/Particle)
Thermal correction to Gibbs Free Energy= 0.368512
Sum of electronic and zero-point Energies= -1297.966715
Sum of electronic and thermal Enthalpies= -1297.927607
Sum of electronic and thermal Free Energies= -1298.045151
```

Single Points using M06-2X/def2TZVP in the gas phase:

```
Counterpoise corrected energy = -1298.381700714511
```

Standard orientation:

| Center Number | Atomic Number | Atomic Type | Coordinates (Angstroms) |           |           |
|---------------|---------------|-------------|-------------------------|-----------|-----------|
|               |               |             | X                       | Y         | Z         |
| 1             | 6             | 0           | 3.870551                | -0.646708 | 0.038921  |
| 2             | 6             | 0           | 4.845382                | 0.268056  | -0.424795 |
| 3             | 6             | 0           | 6.168920                | -0.102792 | -0.648784 |
| 4             | 6             | 0           | 6.512104                | -1.418819 | -0.400480 |
| 5             | 6             | 0           | 5.560823                | -2.344086 | 0.059882  |
| 6             | 6             | 0           | 4.247866                | -1.973380 | 0.281087  |
| 7             | 6             | 0           | 2.647736                | 0.092572  | 0.155125  |
| 8             | 6             | 0           | 2.913451                | 1.395126  | -0.236366 |
| 9             | 1             | 0           | 6.898842                | 0.612958  | -1.004758 |
| 10            | 1             | 0           | 7.532236                | -1.741932 | -0.563382 |
| 11            | 1             | 0           | 5.866262                | -3.366211 | 0.244422  |
| 12            | 1             | 0           | 3.514984                | -2.684973 | 0.636486  |
| 13            | 7             | 0           | 4.231920                | 1.489415  | -0.583060 |
| 14            | 6             | 0           | 1.969032                | 2.466740  | -0.271193 |
| 15            | 6             | 0           | 0.767808                | 2.295799  | 0.090689  |
| 16            | 6             | 0           | 1.320847                | -0.361982 | 0.556794  |
| 17            | 8             | 0           | 0.377091                | 0.518921  | 0.613241  |
| 18            | 8             | 0           | 1.112453                | -1.560956 | 0.821208  |
| 19            | 6             | 0           | -2.516506               | -1.567647 | -0.071985 |
| 20            | 7             | 0           | -1.557454               | -2.358925 | 0.407898  |



|    |   |   |           |           |           |
|----|---|---|-----------|-----------|-----------|
| 21 | 1 | 0 | -0.636129 | -1.952719 | 0.620314  |
| 22 | 7 | 0 | -2.277179 | -0.257900 | -0.162693 |
| 23 | 7 | 0 | -3.694654 | -2.071011 | -0.451776 |
| 24 | 6 | 0 | -1.695673 | -3.804581 | 0.461111  |
| 25 | 6 | 0 | -4.024752 | -3.487372 | -0.290656 |
| 26 | 6 | 0 | -3.143973 | -4.145149 | 0.752706  |
| 27 | 6 | 0 | -4.732236 | -1.245783 | -1.071619 |
| 28 | 6 | 0 | -3.283176 | 0.694444  | -0.603608 |
| 29 | 6 | 0 | -4.152526 | 0.028460  | -1.651980 |
| 30 | 1 | 0 | -2.766666 | 1.568263  | -0.999708 |
| 31 | 1 | 0 | -3.892261 | 1.024380  | 0.242724  |
| 32 | 1 | 0 | -3.550503 | -0.203892 | -2.532227 |
| 33 | 1 | 0 | -4.962602 | 0.689689  | -1.954872 |
| 34 | 1 | 0 | -5.196331 | -1.848983 | -1.853195 |
| 35 | 1 | 0 | -5.498763 | -1.020282 | -0.324754 |
| 36 | 1 | 0 | -5.074321 | -3.541075 | 0.001757  |
| 37 | 1 | 0 | -3.921154 | -3.986734 | -1.258264 |
| 38 | 1 | 0 | -3.296821 | -5.222660 | 0.729225  |
| 39 | 1 | 0 | -3.409828 | -3.782043 | 1.746952  |
| 40 | 1 | 0 | -1.381602 | -4.256071 | -0.484784 |
| 41 | 1 | 0 | -1.035629 | -4.171210 | 1.244913  |
| 42 | 1 | 0 | -1.360591 | 0.071792  | 0.145086  |
| 43 | 1 | 0 | 4.672096  | 2.337929  | -0.900416 |
| 44 | 6 | 0 | -0.537139 | 2.892783  | 0.292457  |
| 45 | 6 | 0 | -1.003787 | 3.831387  | -0.632758 |
| 46 | 6 | 0 | -1.323803 | 2.587741  | 1.407001  |
| 47 | 6 | 0 | -2.232325 | 4.448330  | -0.445674 |
| 48 | 1 | 0 | -0.396168 | 4.067335  | -1.496676 |
| 49 | 6 | 0 | -2.548488 | 3.210155  | 1.589335  |
| 50 | 1 | 0 | -0.963871 | 1.863725  | 2.124261  |
| 51 | 6 | 0 | -3.009128 | 4.139025  | 0.664182  |
| 52 | 1 | 0 | -2.585868 | 5.168901  | -1.171986 |
| 53 | 1 | 0 | -3.147428 | 2.966175  | 2.457560  |
| 54 | 1 | 0 | -3.968722 | 4.618938  | 0.806787  |

---

## Int7

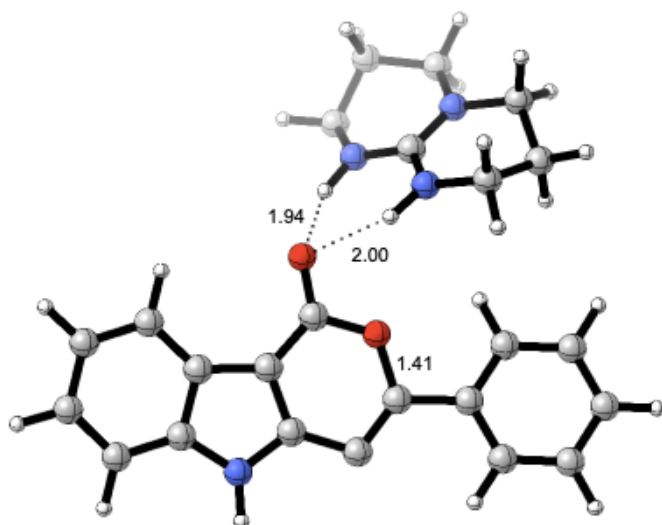

Calculated using M06-2X/def2TZVP in acetonitrile at 373.15 K:

```
HF = -1298.4316993 hartrees
Zero-point correction= 0.449232 (Hartree/Particle)
Thermal correction to Gibbs Free Energy= 0.369508
Sum of electronic and zero-point Energies= -1297.982467
Sum of electronic and thermal Enthalpies= -1297.943269
Sum of electronic and thermal Free Energies= -1298.062191
```

Single Points using M06-2X/def2TZVP in the gas phase:

```
Counterpoise corrected energy = -1298.390860274809
```

Standard orientation:

| Center Number | Atomic Number | Atomic Type | Coordinates (Angstroms) |           |           |
|---------------|---------------|-------------|-------------------------|-----------|-----------|
|               |               |             | X                       | Y         | Z         |
| 1             | 6             | 0           | -3.706252               | 1.003957  | 0.186440  |
| 2             | 6             | 0           | -4.838527               | 0.221489  | -0.137767 |
| 3             | 6             | 0           | -6.119327               | 0.761104  | -0.176554 |
| 4             | 6             | 0           | -6.254958               | 2.108321  | 0.116923  |
| 5             | 6             | 0           | -5.144209               | 2.898783  | 0.440430  |
| 6             | 6             | 0           | -3.869254               | 2.358819  | 0.477061  |
| 7             | 6             | 0           | -2.588222               | 0.105558  | 0.123591  |
| 8             | 6             | 0           | -3.057195               | -1.166349 | -0.225046 |
| 9             | 1             | 0           | -6.977107               | 0.150574  | -0.427523 |
| 10            | 1             | 0           | -7.239229               | 2.558151  | 0.094864  |
| 11            | 1             | 0           | -5.289057               | 3.947774  | 0.664220  |
| 12            | 1             | 0           | -3.011256               | 2.968460  | 0.728702  |
| 13            | 7             | 0           | -4.411576               | -1.069979 | -0.378118 |
| 14            | 6             | 0           | -2.279890               | -2.350009 | -0.392431 |
| 15            | 6             | 0           | -0.975187               | -2.082382 | -0.162695 |
| 16            | 6             | 0           | -1.208020               | 0.278436  | 0.353115  |
| 17            | 8             | 0           | -0.451486               | -0.824610 | 0.197105  |
| 18            | 8             | 0           | -0.625337               | 1.318251  | 0.688314  |
| 19            | 6             | 0           | 2.680471                | 1.696897  | 0.188136  |
| 20            | 7             | 0           | 2.235544                | 0.757459  | 1.025137  |

|    |   |   |           |           |           |
|----|---|---|-----------|-----------|-----------|
| 21 | 1 | 0 | 1.226455  | 0.697841  | 1.129855  |
| 22 | 7 | 0 | 1.780800  | 2.472715  | -0.420272 |
| 23 | 7 | 0 | 3.985040  | 1.856641  | -0.031542 |
| 24 | 6 | 0 | 3.117756  | -0.124906 | 1.769704  |
| 25 | 6 | 0 | 4.981565  | 0.962346  | 0.560574  |
| 26 | 6 | 0 | 4.364568  | -0.368976 | 0.941985  |
| 27 | 6 | 0 | 4.498063  | 2.924874  | -0.890888 |
| 28 | 6 | 0 | 2.143192  | 3.488961  | -1.394401 |
| 29 | 6 | 0 | 3.497692  | 4.056975  | -1.016767 |
| 30 | 1 | 0 | 1.373771  | 4.258002  | -1.376828 |
| 31 | 1 | 0 | 2.174903  | 3.059949  | -2.399657 |
| 32 | 1 | 0 | 3.417015  | 4.587472  | -0.066486 |
| 33 | 1 | 0 | 3.840119  | 4.760079  | -1.773836 |
| 34 | 1 | 0 | 5.425779  | 3.280723  | -0.441789 |
| 35 | 1 | 0 | 4.738899  | 2.505845  | -1.871887 |
| 36 | 1 | 0 | 5.766495  | 0.822190  | -0.183048 |
| 37 | 1 | 0 | 5.427042  | 1.450926  | 1.431604  |
| 38 | 1 | 0 | 5.086715  | -0.958248 | 1.504080  |
| 39 | 1 | 0 | 4.098991  | -0.921229 | 0.038142  |
| 40 | 1 | 0 | 3.379166  | 0.320037  | 2.733526  |
| 41 | 1 | 0 | 2.579894  | -1.052886 | 1.958342  |
| 42 | 1 | 0 | 0.806957  | 2.265714  | -0.219401 |
| 43 | 1 | 0 | -4.998058 | -1.850083 | -0.628791 |
| 44 | 6 | 0 | 0.140969  | -3.049803 | -0.249865 |
| 45 | 6 | 0 | -0.137002 | -4.419862 | -0.290656 |
| 46 | 6 | 0 | 1.478410  | -2.644695 | -0.298839 |
| 47 | 6 | 0 | 0.883999  | -5.351691 | -0.372407 |
| 48 | 1 | 0 | -1.171422 | -4.734056 | -0.255581 |
| 49 | 6 | 0 | 2.501098  | -3.581465 | -0.382591 |
| 50 | 1 | 0 | 1.715700  | -1.588198 | -0.285790 |
| 51 | 6 | 0 | 2.211561  | -4.938464 | -0.417062 |
| 52 | 1 | 0 | 0.645117  | -6.407690 | -0.397039 |
| 53 | 1 | 0 | 3.531241  | -3.249288 | -0.425002 |
| 54 | 1 | 0 | 3.010006  | -5.666549 | -0.480397 |

---

## Int8

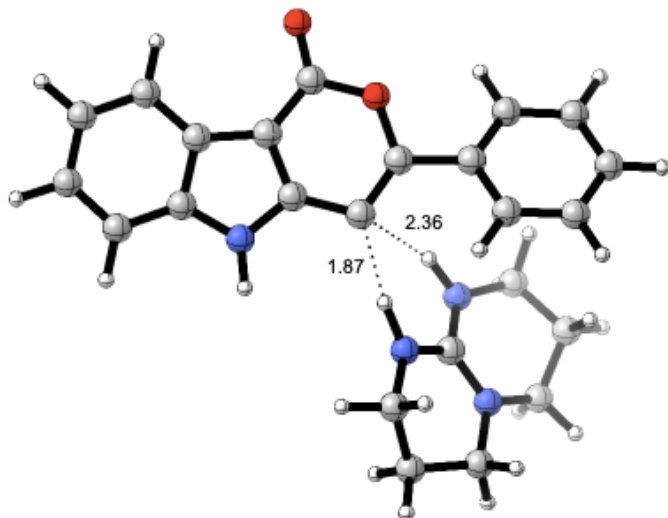

Calculated using M06-2X/def2TZVP in acetonitrile at 373.15 K:

```
HF = -1298.4389172 hartrees
Zero-point correction= 0.448311 (Hartree/Particle)
Thermal correction to Gibbs Free Energy= 0.370151
Sum of electronic and zero-point Energies= -1297.990606
Sum of electronic and thermal Enthalpies= -1297.951705
Sum of electronic and thermal Free Energies= -1298.068766
```

Single Points using M06-2X/def2TZVP in the gas phase:

```
Counterpoise corrected energy = -1298.402719660934
```

Standard orientation:

| Center Number | Atomic Number | Atomic Type | Coordinates (Angstroms) |           |           |
|---------------|---------------|-------------|-------------------------|-----------|-----------|
|               |               |             | X                       | Y         | Z         |
| 1             | 6             | 0           | 4.239334                | -0.083125 | 0.153622  |
| 2             | 6             | 0           | 3.868221                | -1.432827 | -0.049505 |
| 3             | 6             | 0           | 4.790510                | -2.471169 | 0.023570  |
| 4             | 6             | 0           | 6.104853                | -2.139356 | 0.307113  |
| 5             | 6             | 0           | 6.491480                | -0.807885 | 0.512622  |
| 6             | 6             | 0           | 5.571437                | 0.224016  | 0.438755  |
| 7             | 6             | 0           | 3.033163                | 0.677513  | -0.003940 |
| 8             | 6             | 0           | 1.992702                | -0.203913 | -0.289732 |
| 9             | 1             | 0           | 4.490864                | -3.499155 | -0.135282 |
| 10            | 1             | 0           | 6.847391                | -2.924232 | 0.372719  |
| 11            | 1             | 0           | 7.527963                | -0.586441 | 0.732786  |
| 12            | 1             | 0           | 5.870535                | 1.251724  | 0.597339  |
| 13            | 7             | 0           | 2.512973                | -1.467559 | -0.311403 |
| 14            | 6             | 0           | 0.624518                | 0.144525  | -0.513207 |
| 15            | 6             | 0           | 2.764680                | 2.071876  | 0.078813  |
| 16            | 8             | 0           | 1.463305                | 2.411434  | -0.143515 |
| 17            | 8             | 0           | 3.553421                | 2.971127  | 0.317132  |
| 18            | 6             | 0           | -2.451172               | -1.402070 | 0.346446  |
| 19            | 7             | 0           | -2.143982               | -0.354268 | 1.126572  |
| 20            | 1             | 0           | -1.229665               | 0.042791  | 0.940660  |

|    |   |   |           |           |           |
|----|---|---|-----------|-----------|-----------|
| 21 | 7 | 0 | -1.512308 | -1.852364 | -0.477274 |
| 22 | 7 | 0 | -3.656444 | -1.968951 | 0.430548  |
| 23 | 6 | 0 | -3.127948 | 0.473843  | 1.814735  |
| 24 | 6 | 0 | -4.679068 | -1.391940 | 1.298756  |
| 25 | 6 | 0 | -4.524704 | 0.117089  | 1.341000  |
| 26 | 6 | 0 | -3.993913 | -3.164698 | -0.340115 |
| 27 | 6 | 0 | -1.751786 | -2.965880 | -1.377669 |
| 28 | 6 | 0 | -2.739368 | -3.922140 | -0.734526 |
| 29 | 1 | 0 | -0.798545 | -3.457091 | -1.570001 |
| 30 | 1 | 0 | -2.143483 | -2.606308 | -2.334244 |
| 31 | 1 | 0 | -2.287101 | -4.369223 | 0.152719  |
| 32 | 1 | 0 | -2.999619 | -4.722811 | -1.424749 |
| 33 | 1 | 0 | -4.633501 | -3.785194 | 0.287860  |
| 34 | 1 | 0 | -4.569268 | -2.875595 | -1.224114 |
| 35 | 1 | 0 | -5.646935 | -1.669518 | 0.882953  |
| 36 | 1 | 0 | -4.604353 | -1.823682 | 2.301414  |
| 37 | 1 | 0 | -5.265487 | 0.551115  | 2.010385  |
| 38 | 1 | 0 | -4.687833 | 0.520006  | 0.339544  |
| 39 | 1 | 0 | -3.040856 | 0.325178  | 2.893014  |
| 40 | 1 | 0 | -2.900976 | 1.518389  | 1.590859  |
| 41 | 1 | 0 | -0.673423 | -1.203206 | -0.596983 |
| 42 | 1 | 0 | 1.970740  | -2.295379 | -0.500810 |
| 43 | 6 | 0 | 0.458435  | 1.485330  | -0.422181 |
| 44 | 6 | 0 | -0.833888 | 2.192616  | -0.564281 |
| 45 | 6 | 0 | -1.061569 | 3.434656  | 0.034317  |
| 46 | 6 | 0 | -1.877101 | 1.596806  | -1.279635 |
| 47 | 6 | 0 | -2.303250 | 4.049583  | -0.060710 |
| 48 | 1 | 0 | -0.263802 | 3.913898  | 0.585223  |
| 49 | 6 | 0 | -3.113549 | 2.213424  | -1.377171 |
| 50 | 1 | 0 | -1.702151 | 0.640935  | -1.757511 |
| 51 | 6 | 0 | -3.335821 | 3.441694  | -0.762303 |
| 52 | 1 | 0 | -2.463395 | 5.007543  | 0.417830  |
| 53 | 1 | 0 | -3.906985 | 1.737552  | -1.940301 |
| 54 | 1 | 0 | -4.302753 | 3.922407  | -0.837983 |

---

## TS3

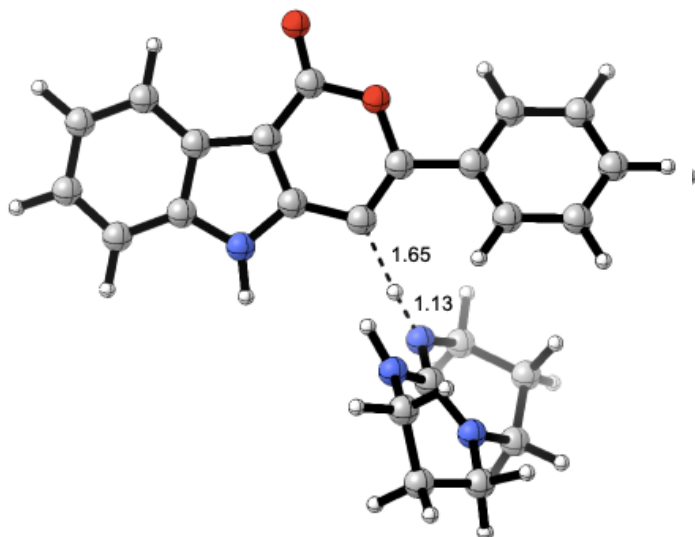

Calculated using M06-2X/def2TZVP in acetonitrile at 373.15 K:

```
HF = -1298.4371368 hartrees
Zero-point correction= 0.445578 (Hartree/Particle)
Thermal correction to Gibbs Free Energy= 0.365887
Sum of electronic and zero-point Energies= -1297.991559
Sum of electronic and thermal Enthalpies= -1297.953254
Sum of electronic and thermal Free Energies= -1298.071250
```

Single Points using M06-2X/def2TZVP in the gas phase:

Counterpoise corrected energy = -1298.401475485965

Standard orientation:

| Center Number | Atomic Number | Atomic Type | Coordinates (Angstroms) |           |           |
|---------------|---------------|-------------|-------------------------|-----------|-----------|
|               |               |             | X                       | Y         | Z         |
| 1             | 6             | 0           | -4.152652               | -0.358778 | -0.033539 |
| 2             | 6             | 0           | -3.594334               | -1.638849 | -0.255467 |
| 3             | 6             | 0           | -4.384658               | -2.769455 | -0.427813 |
| 4             | 6             | 0           | -5.758598               | -2.602137 | -0.376853 |
| 5             | 6             | 0           | -6.330538               | -1.341057 | -0.159698 |
| 6             | 6             | 0           | -5.540874               | -0.217014 | 0.012629  |
| 7             | 6             | 0           | -3.036147               | 0.533390  | 0.093946  |
| 8             | 6             | 0           | -1.865114               | -0.207312 | -0.049851 |
| 9             | 1             | 0           | -3.941245               | -3.742732 | -0.594759 |
| 10            | 1             | 0           | -6.402759               | -3.462141 | -0.507200 |
| 11            | 1             | 0           | -7.408429               | -1.247924 | -0.126983 |
| 12            | 1             | 0           | -5.983441               | 0.756461  | 0.178817  |
| 13            | 7             | 0           | -2.218701               | -1.510444 | -0.259544 |
| 14            | 6             | 0           | -0.535479               | 0.310146  | 0.002871  |
| 15            | 6             | 0           | -2.955000               | 1.935378  | 0.314741  |
| 16            | 8             | 0           | -1.682333               | 2.427701  | 0.369266  |
| 17            | 8             | 0           | -3.872672               | 2.724706  | 0.458400  |
| 18            | 6             | 0           | 2.466793                | -1.552335 | -0.123781 |
| 19            | 7             | 0           | 1.763221                | -0.874275 | -1.010603 |
| 20            | 1             | 0           | 0.806837                | -0.425296 | -0.614623 |
| 21            | 7             | 0           | 1.841135                | -1.914904 | 1.015489  |

|    |   |   |           |           |           |
|----|---|---|-----------|-----------|-----------|
| 22 | 7 | 0 | 3.746588  | -1.891868 | -0.318309 |
| 23 | 6 | 0 | 2.366552  | -0.327024 | -2.212248 |
| 24 | 6 | 0 | 4.471171  | -1.402868 | -1.490844 |
| 25 | 6 | 0 | 3.854601  | -0.113892 | -1.999706 |
| 26 | 6 | 0 | 4.505534  | -2.700711 | 0.633819  |
| 27 | 6 | 0 | 2.541505  | -2.530223 | 2.129106  |
| 28 | 6 | 0 | 3.587027  | -3.472032 | 1.562488  |
| 29 | 1 | 0 | 1.812093  | -3.068313 | 2.731000  |
| 30 | 1 | 0 | 3.014696  | -1.772803 | 2.761979  |
| 31 | 1 | 0 | 3.089974  | -4.274650 | 1.014923  |
| 32 | 1 | 0 | 4.174055  | -3.917135 | 2.363980  |
| 33 | 1 | 0 | 5.130139  | -3.383524 | 0.055934  |
| 34 | 1 | 0 | 5.169206  | -2.045352 | 1.206074  |
| 35 | 1 | 0 | 5.505399  | -1.241887 | -1.184608 |
| 36 | 1 | 0 | 4.467535  | -2.171954 | -2.269161 |
| 37 | 1 | 0 | 4.339467  | 0.183853  | -2.928214 |
| 38 | 1 | 0 | 4.005244  | 0.678238  | -1.262603 |
| 39 | 1 | 0 | 2.199117  | -0.997543 | -3.060120 |
| 40 | 1 | 0 | 1.861383  | 0.615720  | -2.430030 |
| 41 | 1 | 0 | 0.930010  | -1.498305 | 1.156080  |
| 42 | 1 | 0 | -1.560045 | -2.258707 | -0.405417 |
| 43 | 6 | 0 | -0.543713 | 1.645444  | 0.218446  |
| 44 | 6 | 0 | 0.661111  | 2.498367  | 0.294820  |
| 45 | 6 | 0 | 0.616172  | 3.853290  | -0.042071 |
| 46 | 6 | 0 | 1.882271  | 1.950123  | 0.696206  |
| 47 | 6 | 0 | 1.765584  | 4.630443  | -0.002185 |
| 48 | 1 | 0 | -0.323406 | 4.294532  | -0.346065 |
| 49 | 6 | 0 | 3.028526  | 2.728899  | 0.739005  |
| 50 | 1 | 0 | 1.918128  | 0.911060  | 0.997026  |
| 51 | 6 | 0 | 2.976940  | 4.072226  | 0.384366  |
| 52 | 1 | 0 | 1.714154  | 5.676710  | -0.276145 |
| 53 | 1 | 0 | 3.964134  | 2.288746  | 1.061833  |
| 54 | 1 | 0 | 3.872006  | 4.680009  | 0.417411  |

---

## Int9

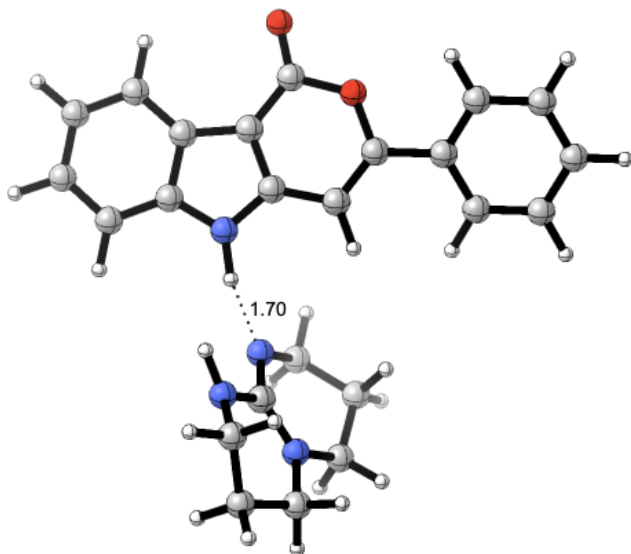

Calculated using M06-2X/def2TZVP in acetonitrile at 373.15 K:

```
HF = -1298.4779289 hartrees
Zero-point correction= 0.447165 (Hartree/Particle)
Thermal correction to Gibbs Free Energy= 0.365103
Sum of electronic and zero-point Energies= -1298.030764
Sum of electronic and thermal Enthalpies= -1297.991531
Sum of electronic and thermal Free Energies= -1298.112826
```

Single Points using M06-2X/def2TZVP in the gas phase:

Counterpoise corrected energy = -1298.455170564956

Standard orientation:

| Center Number | Atomic Number | Atomic Type | Coordinates (Angstroms) |           |           |
|---------------|---------------|-------------|-------------------------|-----------|-----------|
|               |               |             | X                       | Y         | Z         |
| 1             | 6             | 0           | -1.639355               | 3.148103  | 0.035870  |
| 2             | 6             | 0           | -0.236556               | 3.017729  | 0.165898  |
| 3             | 6             | 0           | 0.598040                | 4.128054  | 0.257664  |
| 4             | 6             | 0           | 0.005549                | 5.377656  | 0.216505  |
| 5             | 6             | 0           | -1.383816               | 5.523072  | 0.086432  |
| 6             | 6             | 0           | -2.213848               | 4.420345  | -0.004543 |
| 7             | 6             | 0           | -2.143771               | 1.806726  | -0.024130 |
| 8             | 6             | 0           | -1.045973               | 0.955889  | 0.068564  |
| 9             | 1             | 0           | 1.669850                | 4.013211  | 0.356448  |
| 10            | 1             | 0           | 0.626573                | 6.261630  | 0.283721  |
| 11            | 1             | 0           | -1.809898               | 6.517502  | 0.056467  |
| 12            | 1             | 0           | -3.285340               | 4.534550  | -0.104342 |
| 13            | 7             | 0           | 0.090122                | 1.674476  | 0.178468  |
| 14            | 6             | 0           | -1.187642               | -0.458595 | 0.035291  |
| 15            | 6             | 0           | -2.445365               | -0.935962 | -0.076734 |
| 16            | 6             | 0           | -3.454705               | 1.277242  | -0.153430 |
| 17            | 8             | 0           | -4.506420               | 1.868652  | -0.249892 |
| 18            | 8             | 0           | -3.518105               | -0.109717 | -0.163911 |
| 19            | 6             | 0           | 3.348226                | -0.230388 | -0.034445 |



|    |   |   |           |           |           |
|----|---|---|-----------|-----------|-----------|
| 20 | 7 | 0 | 3.635215  | 0.427539  | -1.204353 |
| 21 | 1 | 0 | 2.885787  | 1.024383  | -1.516470 |
| 22 | 7 | 0 | 2.329629  | 0.180173  | 0.660388  |
| 23 | 7 | 0 | 4.180865  | -1.241089 | 0.327214  |
| 24 | 6 | 0 | 4.505420  | -0.152754 | -2.210005 |
| 25 | 1 | 0 | 4.014621  | -0.970211 | -2.751787 |
| 26 | 1 | 0 | 4.758157  | 0.624668  | -2.928884 |
| 27 | 6 | 0 | 5.318855  | -1.692830 | -0.466437 |
| 28 | 1 | 0 | 6.140390  | -1.904449 | 0.222054  |
| 29 | 1 | 0 | 5.055843  | -2.636316 | -0.958506 |
| 30 | 6 | 0 | 5.741404  | -0.668118 | -1.500102 |
| 31 | 1 | 0 | 6.250126  | 0.168401  | -1.017973 |
| 32 | 1 | 0 | 6.431886  | -1.128920 | -2.205371 |
| 33 | 6 | 0 | 3.898575  | -2.053588 | 1.505431  |
| 34 | 1 | 0 | 4.141684  | -3.089229 | 1.257393  |
| 35 | 1 | 0 | 4.558184  | -1.749631 | 2.324919  |
| 36 | 6 | 0 | 2.080580  | -0.453637 | 1.943442  |
| 37 | 1 | 0 | 1.023150  | -0.321973 | 2.189211  |
| 38 | 1 | 0 | 2.649823  | 0.045726  | 2.737742  |
| 39 | 6 | 0 | 2.445840  | -1.928436 | 1.917115  |
| 40 | 1 | 0 | 2.297212  | -2.393675 | 2.891449  |
| 41 | 1 | 0 | 1.813439  | -2.446897 | 1.192091  |
| 42 | 1 | 0 | -0.331223 | -1.114863 | 0.065445  |
| 43 | 1 | 0 | 1.043057  | 1.229088  | 0.288650  |
| 44 | 6 | 0 | -2.818978 | -2.358362 | -0.142898 |
| 45 | 6 | 0 | -4.043409 | -2.738580 | -0.693712 |
| 46 | 6 | 0 | -1.952564 | -3.344206 | 0.333861  |
| 47 | 6 | 0 | -4.384709 | -4.080005 | -0.781373 |
| 48 | 1 | 0 | -4.722537 | -1.981605 | -1.060640 |
| 49 | 6 | 0 | -2.297374 | -4.682609 | 0.244110  |
| 50 | 1 | 0 | -1.015381 | -3.065684 | 0.797748  |
| 51 | 6 | 0 | -3.513459 | -5.055692 | -0.316422 |
| 52 | 1 | 0 | -5.334560 | -4.363264 | -1.216007 |
| 53 | 1 | 0 | -1.619019 | -5.436044 | 0.622592  |
| 54 | 1 | 0 | -3.782252 | -6.101900 | -0.383253 |

---

## Int10

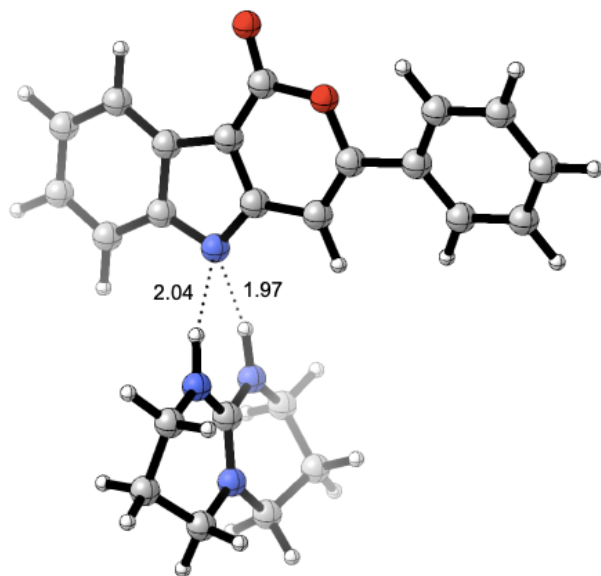

Calculated using M06-2X/def2TZVP in acetonitrile at 373.15 K:

```
HF = -1298.4840367 hartrees
Zero-point correction=          0.448721 (Hartree/Particle)
Thermal correction to Gibbs Free Energy=    0.366339
Sum of electronic and zero-point Energies=   -1298.035316
Sum of electronic and thermal Enthalpies=    -1297.996137
Sum of electronic and thermal Free Energies=  -1298.117698
```

Single Points using M06-2X/def2TZVP in the gas phase:

Counterpoise corrected energy = -1298.443117413520

Standard orientation:

| Center Number | Atomic Number | Atomic Type | Coordinates (Angstroms) |           |           |
|---------------|---------------|-------------|-------------------------|-----------|-----------|
|               |               |             | X                       | Y         | Z         |
| 1             | 6             | 0           | -0.702984               | 3.187429  | 0.103392  |
| 2             | 6             | 0           | 0.573253                | 2.563731  | 0.198005  |
| 3             | 6             | 0           | 1.736601                | 3.337215  | 0.248929  |
| 4             | 6             | 0           | 1.616280                | 4.714825  | 0.205969  |
| 5             | 6             | 0           | 0.358076                | 5.332255  | 0.113107  |
| 6             | 6             | 0           | -0.803319               | 4.580816  | 0.060918  |
| 7             | 6             | 0           | -1.627186               | 2.097192  | 0.073044  |
| 8             | 6             | 0           | -0.841840               | 0.930343  | 0.151081  |
| 9             | 1             | 0           | 2.707681                | 2.860462  | 0.321459  |
| 10            | 1             | 0           | 2.506487                | 5.330540  | 0.243343  |
| 11            | 1             | 0           | 0.299588                | 6.412994  | 0.081306  |
| 12            | 1             | 0           | -1.771058               | 5.061170  | -0.013108 |
| 13            | 1             | 0           | 1.807801                | 0.026113  | 1.092744  |
| 14            | 7             | 0           | 0.472363                | 1.185266  | 0.225581  |
| 15            | 6             | 0           | -1.474329               | -0.352268 | 0.132758  |
| 16            | 6             | 0           | -2.819006               | -0.386893 | 0.048691  |
| 17            | 6             | 0           | -3.034807               | 2.035548  | -0.023370 |
| 18            | 8             | 0           | -3.842531               | 2.942046  | -0.102276 |
| 19            | 8             | 0           | -3.564499               | 0.749203  | -0.025374 |

|    |   |   |           |           |           |
|----|---|---|-----------|-----------|-----------|
| 20 | 6 | 0 | 3.098216  | -0.991330 | -0.041013 |
| 21 | 7 | 0 | 2.590673  | -0.633042 | 1.138852  |
| 22 | 7 | 0 | 2.542841  | -0.475030 | -1.140308 |
| 23 | 7 | 0 | 4.126239  | -1.836298 | -0.123460 |
| 24 | 6 | 0 | 3.144141  | -1.083562 | 2.403781  |
| 25 | 6 | 0 | 4.704245  | -2.462787 | 1.066124  |
| 26 | 6 | 0 | 3.715549  | -2.476407 | 2.215755  |
| 27 | 6 | 0 | 4.740732  | -2.183139 | -1.405486 |
| 28 | 6 | 0 | 2.964570  | -0.838909 | -2.481864 |
| 29 | 6 | 0 | 4.453441  | -1.128935 | -2.457033 |
| 30 | 1 | 0 | 2.734809  | -0.006148 | -3.143064 |
| 31 | 1 | 0 | 2.411569  | -1.715053 | -2.831952 |
| 32 | 1 | 0 | 4.997789  | -0.212900 | -2.221512 |
| 33 | 1 | 0 | 4.788799  | -1.486605 | -3.428850 |
| 34 | 1 | 0 | 5.814068  | -2.271401 | -1.233611 |
| 35 | 1 | 0 | 4.370609  | -3.161662 | -1.724193 |
| 36 | 1 | 0 | 4.984930  | -3.479483 | 0.789128  |
| 37 | 1 | 0 | 5.616151  | -1.926208 | 1.342563  |
| 38 | 1 | 0 | 4.219202  | -2.806926 | 3.122454  |
| 39 | 1 | 0 | 2.905518  | -3.174910 | 1.998773  |
| 40 | 1 | 0 | 3.921820  | -0.395834 | 2.747841  |
| 41 | 1 | 0 | 2.342570  | -1.082311 | 3.139706  |
| 42 | 1 | 0 | 1.752617  | 0.147971  | -0.976128 |
| 43 | 1 | 0 | -0.895861 | -1.263960 | 0.160523  |
| 44 | 6 | 0 | -3.647592 | -1.604586 | -0.000888 |
| 45 | 6 | 0 | -4.943683 | -1.553372 | -0.516040 |
| 46 | 6 | 0 | -3.151384 | -2.827766 | 0.456513  |
| 47 | 6 | 0 | -5.718540 | -2.702258 | -0.586739 |
| 48 | 1 | 0 | -5.339379 | -0.610830 | -0.868068 |
| 49 | 6 | 0 | -3.927930 | -3.972726 | 0.384396  |
| 50 | 1 | 0 | -2.161118 | -2.883745 | 0.889113  |
| 51 | 6 | 0 | -5.214335 | -3.915782 | -0.139497 |
| 52 | 1 | 0 | -6.720122 | -2.646804 | -0.993425 |
| 53 | 1 | 0 | -3.531423 | -4.911685 | 0.748795  |
| 54 | 1 | 0 | -5.820613 | -4.810845 | -0.190508 |

---

**B**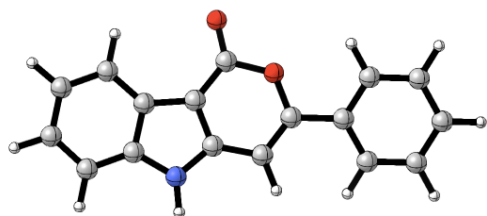

Calculated using M06-2X/def2TZVP in acetonitrile at 373.15 K:

```

HF = -859.657192 hartrees
Zero-point correction= 0.240111 (Hartree/Particle)
Thermal correction to Gibbs Free Energy= 0.182821
Sum of electronic and zero-point Energies= -859.417081
Sum of electronic and thermal Enthalpies= -859.393831
Sum of electronic and thermal Free Energies= -859.474371

```

Single Points using M06-2X/def2TZVP in the gas phase:

HF = -859.640199 hartrees

Standard orientation:

| Center<br>Number | Atomic<br>Number | Atomic<br>Type | Coordinates (Angstroms) |           |           |
|------------------|------------------|----------------|-------------------------|-----------|-----------|
|                  |                  |                | X                       | Y         | Z         |
| 1                | 6                | 0              | 2.711377                | 0.318071  | 0.019906  |
| 2                | 6                | 0              | 3.012169                | -1.057073 | -0.077607 |
| 3                | 6                | 0              | 4.319169                | -1.528479 | -0.115641 |
| 4                | 6                | 0              | 5.332572                | -0.588297 | -0.055305 |
| 5                | 6                | 0              | 5.053116                | 0.782760  | 0.040239  |
| 6                | 6                | 0              | 3.751329                | 1.247632  | 0.078505  |
| 7                | 6                | 0              | 1.279139                | 0.403811  | 0.034574  |
| 8                | 6                | 0              | 0.780755                | -0.888895 | -0.052757 |
| 9                | 1                | 0              | 4.532714                | -2.586587 | -0.189436 |
| 10               | 1                | 0              | 6.362659                | -0.919014 | -0.082184 |
| 11               | 1                | 0              | 5.873896                | 1.486513  | 0.085235  |
| 12               | 1                | 0              | 3.535308                | 2.305029  | 0.152803  |
| 13               | 7                | 0              | 1.817711                | -1.758718 | -0.120902 |
| 14               | 6                | 0              | -0.612606               | -1.160221 | -0.071110 |
| 15               | 6                | 0              | -1.434262               | -0.091480 | 0.016566  |
| 16               | 6                | 0              | 0.390881                | 1.511597  | 0.112917  |
| 17               | 8                | 0              | 0.657400                | 2.688092  | 0.187695  |
| 18               | 8                | 0              | -0.953350               | 1.172281  | 0.104991  |
| 19               | 1                | 0              | -1.001274               | -2.160554 | -0.172696 |
| 20               | 1                | 0              | 1.732179                | -2.760262 | -0.189598 |
| 21               | 6                | 0              | -2.905594               | -0.139374 | 0.007979  |
| 22               | 6                | 0              | -3.643299               | 1.003584  | -0.304275 |
| 23               | 6                | 0              | -3.580492               | -1.325441 | 0.304211  |
| 24               | 6                | 0              | -5.029036               | 0.954687  | -0.333526 |
| 25               | 1                | 0              | -3.128028               | 1.926715  | -0.530035 |
| 26               | 6                | 0              | -4.964277               | -1.369164 | 0.274202  |
| 27               | 1                | 0              | -3.027467               | -2.213615 | 0.579503  |
| 28               | 6                | 0              | -5.693454               | -0.229970 | -0.047064 |
| 29               | 1                | 0              | -5.590423               | 1.845770  | -0.582398 |
| 30               | 1                | 0              | -5.476036               | -2.292736 | 0.510695  |
| 31               | 1                | 0              | -6.774826               | -0.265698 | -0.067952 |

IntS4a

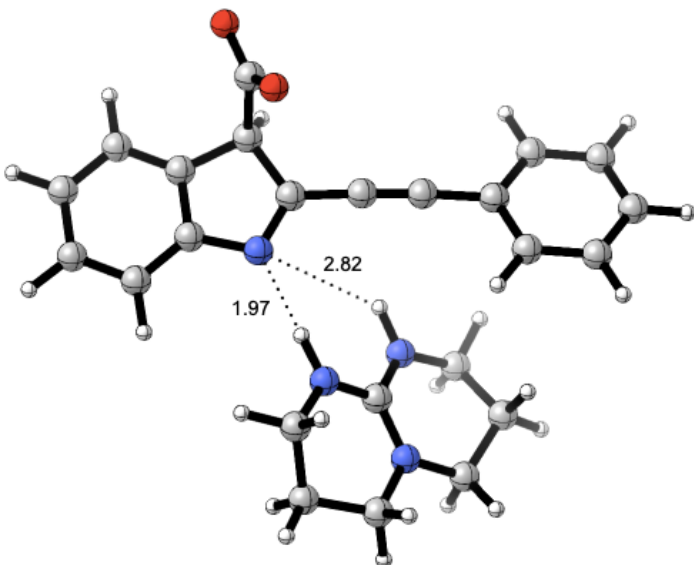

Calculated using M06-2X/def2TZVP in acetonitrile at 373.15 K:

HF = -1298.4184906 hartrees  
 Zero-point correction= 0.445870 (Hartree/Particle)  
 Thermal correction to Gibbs Free Energy= 0.360363  
 Sum of electronic and zero-point Energies= -1297.972620  
 Sum of electronic and thermal Enthalpies= -1297.931542  
 Sum of electronic and thermal Free Energies= -1298.058127

Standard orientation:

| Center Number | Atomic Number | Atomic Type | Coordinates (Angstroms) |           |           |
|---------------|---------------|-------------|-------------------------|-----------|-----------|
|               |               |             | X                       | Y         | Z         |
| 1             | 6             | 0           | 3.895901                | -0.264185 | -0.521130 |
| 2             | 6             | 0           | 3.103289                | 0.850550  | -0.231533 |
| 3             | 6             | 0           | 3.626687                | 2.132914  | -0.204372 |
| 4             | 6             | 0           | 4.982425                | 2.279866  | -0.476447 |
| 5             | 6             | 0           | 5.780087                | 1.173036  | -0.761289 |
| 6             | 6             | 0           | 5.244293                | -0.113162 | -0.782913 |
| 7             | 6             | 0           | 3.015050                | -1.470720 | -0.427693 |
| 8             | 6             | 0           | 1.704911                | -0.809484 | -0.122133 |
| 9             | 1             | 0           | 2.998936                | 2.985590  | 0.020912  |
| 10            | 1             | 0           | 5.425164                | 3.267387  | -0.464861 |
| 11            | 1             | 0           | 6.832828                | 1.316634  | -0.967835 |
| 12            | 1             | 0           | 5.865753                | -0.973078 | -0.997497 |
| 13            | 1             | 0           | 2.968599                | -2.053258 | -1.349033 |
| 14            | 7             | 0           | 1.761946                | 0.476025  | 0.005193  |
| 15            | 6             | 0           | 0.475121                | -1.509280 | 0.015374  |
| 16            | 6             | 0           | -0.592419               | -2.065031 | 0.087532  |
| 17            | 6             | 0           | 3.528950                | -2.431283 | 0.715829  |
| 18            | 8             | 0           | 4.463194                | -3.172755 | 0.373475  |
| 19            | 8             | 0           | 2.978941                | -2.315142 | 1.823129  |
| 20            | 6             | 0           | -1.700594               | 1.958267  | -0.114247 |
| 21            | 7             | 0           | -1.716862               | 0.871230  | -0.894844 |
| 22            | 1             | 0           | -0.915931               | 0.258951  | -0.848438 |

|    |   |   |           |           |           |
|----|---|---|-----------|-----------|-----------|
| 23 | 7 | 0 | -0.604159 | 2.208634  | 0.599055  |
| 24 | 7 | 0 | -2.760869 | 2.761688  | -0.055889 |
| 25 | 6 | 0 | -2.846102 | 0.494498  | -1.732658 |
| 26 | 6 | 0 | -3.998955 | 2.465045  | -0.778417 |
| 27 | 6 | 0 | -4.122353 | 0.984514  | -1.077070 |
| 28 | 6 | 0 | -2.744002 | 4.010891  | 0.708665  |
| 29 | 6 | 0 | -0.505497 | 3.340261  | 1.508681  |
| 30 | 6 | 0 | -1.326518 | 4.487979  | 0.953281  |
| 31 | 1 | 0 | 0.545806  | 3.607205  | 1.592686  |
| 32 | 1 | 0 | -0.864743 | 3.058321  | 2.501718  |
| 33 | 1 | 0 | -0.883876 | 4.833440  | 0.017458  |
| 34 | 1 | 0 | -1.341054 | 5.320902  | 1.653798  |
| 35 | 1 | 0 | -3.303963 | 4.747092  | 0.131333  |
| 36 | 1 | 0 | -3.270840 | 3.852774  | 1.653495  |
| 37 | 1 | 0 | -4.824376 | 2.798448  | -0.149099 |
| 38 | 1 | 0 | -4.019353 | 3.053296  | -1.699772 |
| 39 | 1 | 0 | -4.972714 | 0.816332  | -1.735492 |
| 40 | 1 | 0 | -4.293986 | 0.433320  | -0.150712 |
| 41 | 1 | 0 | -2.736596 | 0.924105  | -2.731313 |
| 42 | 1 | 0 | -2.841291 | -0.590972 | -1.824321 |
| 43 | 1 | 0 | 0.214468  | 1.612880  | 0.445556  |
| 44 | 6 | 0 | -1.888098 | -2.659017 | 0.165108  |
| 45 | 6 | 0 | -2.921169 | -1.975872 | 0.815726  |
| 46 | 6 | 0 | -2.139758 | -3.900740 | -0.425062 |
| 47 | 6 | 0 | -4.189893 | -2.529094 | 0.867183  |
| 48 | 1 | 0 | -2.715492 | -1.017250 | 1.276083  |
| 49 | 6 | 0 | -3.411847 | -4.445985 | -0.367465 |
| 50 | 1 | 0 | -1.336967 | -4.424383 | -0.926860 |
| 51 | 6 | 0 | -4.437364 | -3.762338 | 0.275385  |
| 52 | 1 | 0 | -4.987246 | -1.998718 | 1.371448  |
| 53 | 1 | 0 | -3.603769 | -5.406771 | -0.826606 |
| 54 | 1 | 0 | -5.429710 | -4.191906 | 0.317883  |

---

## TS-S2

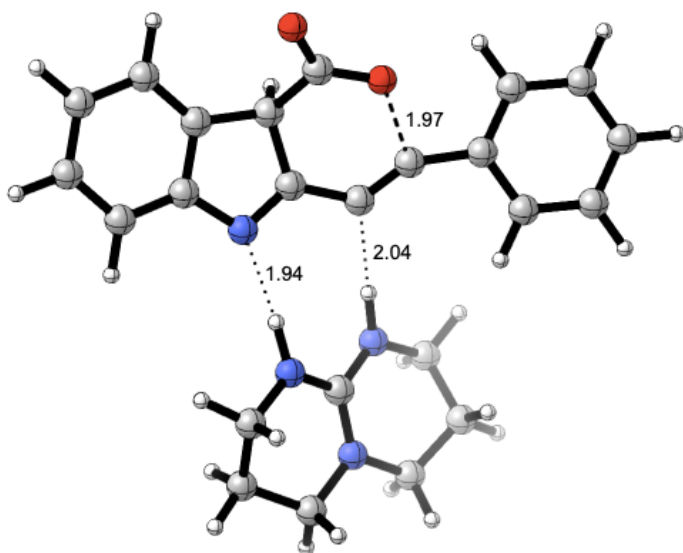

Calculated using M06-2X/def2TZVP in acetonitrile at 373.15 K:

```

HF = -1298.3820817 hartrees
Zero-point correction=                0.444869 (Hartree/Particle)
Thermal correction to Gibbs Free Energy= 0.362386
Sum of electronic and zero-point Energies= -1297.937213
Sum of electronic and thermal Enthalpies= -1297.897714
Sum of electronic and thermal Free Energies= -1298.019696
  
```

Standard orientation:

| Center Number | Atomic Number | Atomic Type | Coordinates (Angstroms) |           |           |
|---------------|---------------|-------------|-------------------------|-----------|-----------|
|               |               |             | X                       | Y         | Z         |
| 1             | 6             | 0           | 3.500644                | -1.228905 | 0.408389  |
| 2             | 6             | 0           | 2.461462                | -2.135772 | 0.165166  |
| 3             | 6             | 0           | 2.709008                | -3.483971 | -0.038949 |
| 4             | 6             | 0           | 4.030966                | -3.914706 | 0.007817  |
| 5             | 6             | 0           | 5.068924                | -3.018581 | 0.251667  |
| 6             | 6             | 0           | 4.810531                | -1.663966 | 0.457565  |
| 7             | 6             | 0           | 2.866283                | 0.109291  | 0.599872  |
| 8             | 6             | 0           | 1.412461                | -0.241772 | 0.388990  |
| 9             | 1             | 0           | 1.896941                | -4.174686 | -0.227096 |
| 10            | 1             | 0           | 4.256306                | -4.961823 | -0.149416 |
| 11            | 1             | 0           | 6.089045                | -3.379335 | 0.278512  |
| 12            | 1             | 0           | 5.616840                | -0.965672 | 0.638494  |
| 13            | 1             | 0           | 2.998059                | 0.478883  | 1.624125  |
| 14            | 7             | 0           | 1.201181                | -1.497086 | 0.158709  |
| 15            | 6             | 0           | 0.434929                | 0.795111  | 0.369704  |
| 16            | 6             | 0           | 0.662232                | 1.997492  | 0.081440  |
| 17            | 6             | 0           | 3.344762                | 1.286494  | -0.293164 |
| 18            | 8             | 0           | 4.471618                | 1.222001  | -0.773673 |
| 19            | 8             | 0           | 2.545251                | 2.268193  | -0.418921 |
| 20            | 6             | 0           | -2.656896               | -1.427348 | 0.124816  |
| 21            | 7             | 0           | -2.384669               | -0.312408 | 0.806356  |
| 22            | 1             | 0           | -1.436874               | 0.070488  | 0.729090  |
| 23            | 7             | 0           | -1.645142               | -2.120642 | -0.396801 |

|    |   |   |           |           |           |
|----|---|---|-----------|-----------|-----------|
| 24 | 7 | 0 | -3.917496 | -1.839505 | -0.027193 |
| 25 | 6 | 0 | -3.420985 | 0.498042  | 1.424703  |
| 26 | 6 | 0 | -5.060405 | -1.027037 | 0.393979  |
| 27 | 6 | 0 | -4.673355 | 0.427581  | 0.571583  |
| 28 | 6 | 0 | -4.250775 | -3.131404 | -0.629047 |
| 29 | 6 | 0 | -1.856400 | -3.320026 | -1.190314 |
| 30 | 6 | 0 | -3.056846 | -4.065130 | -0.637832 |
| 31 | 1 | 0 | -0.949865 | -3.918811 | -1.129090 |
| 32 | 1 | 0 | -2.020041 | -3.059765 | -2.239746 |
| 33 | 1 | 0 | -2.838052 | -4.402653 | 0.376599  |
| 34 | 1 | 0 | -3.285649 | -4.937207 | -1.247984 |
| 35 | 1 | 0 | -5.070186 | -3.556271 | -0.047207 |
| 36 | 1 | 0 | -4.616535 | -2.960078 | -1.645322 |
| 37 | 1 | 0 | -5.828632 | -1.132857 | -0.373263 |
| 38 | 1 | 0 | -5.459596 | -1.437767 | 1.325603  |
| 39 | 1 | 0 | -5.493493 | 0.963891  | 1.045865  |
| 40 | 1 | 0 | -4.478313 | 0.884944  | -0.400215 |
| 41 | 1 | 0 | -3.628884 | 0.139753  | 2.436428  |
| 42 | 1 | 0 | -3.041546 | 1.515658  | 1.499899  |
| 43 | 1 | 0 | -0.682653 | -1.855197 | -0.164176 |
| 44 | 6 | 0 | 0.143124  | 3.328783  | -0.117485 |
| 45 | 6 | 0 | -1.199969 | 3.451800  | -0.492122 |
| 46 | 6 | 0 | 0.902779  | 4.479505  | 0.097999  |
| 47 | 6 | 0 | -1.772602 | 4.704860  | -0.635943 |
| 48 | 1 | 0 | -1.780756 | 2.555712  | -0.672896 |
| 49 | 6 | 0 | 0.322405  | 5.729676  | -0.050646 |
| 50 | 1 | 0 | 1.940600  | 4.380016  | 0.377800  |
| 51 | 6 | 0 | -1.012965 | 5.847530  | -0.415649 |
| 52 | 1 | 0 | -2.811407 | 4.789010  | -0.927700 |
| 53 | 1 | 0 | 0.916400  | 6.617885  | 0.121894  |
| 54 | 1 | 0 | -1.459655 | 6.826527  | -0.532189 |

---



## IntS5

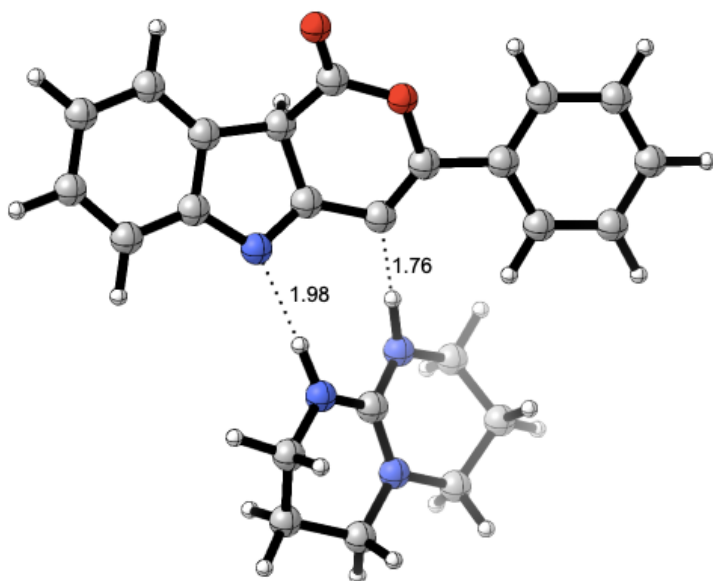

Calculated using M06-2X/def2TZVP in acetonitrile at 373.15 K:

```
HF = -1298.4023978 hartrees
Zero-point correction=                0.445868 (Hartree/Particle)
Thermal correction to Gibbs Free Energy= 0.366528
Sum of electronic and zero-point Energies= -1297.956530
Sum of electronic and thermal Enthalpies= -1297.917632
Sum of electronic and thermal Free Energies= -1298.035869
```

Standard orientation:

| Center Number | Atomic Number | Atomic Type | Coordinates (Angstroms) |           |           |
|---------------|---------------|-------------|-------------------------|-----------|-----------|
|               |               |             | X                       | Y         | Z         |
| 1             | 6             | 0           | 3.725570                | -0.539646 | 0.427969  |
| 2             | 6             | 0           | 2.915447                | -1.643168 | 0.121492  |
| 3             | 6             | 0           | 3.471242                | -2.892140 | -0.105208 |
| 4             | 6             | 0           | 4.855557                | -3.015997 | -0.021746 |
| 5             | 6             | 0           | 5.659971                | -1.922449 | 0.283683  |
| 6             | 6             | 0           | 5.095504                | -0.668170 | 0.520133  |
| 7             | 6             | 0           | 2.787250                | 0.604009  | 0.642044  |
| 8             | 6             | 0           | 1.450947                | -0.033137 | 0.328663  |
| 9             | 1             | 0           | 2.843401                | -3.741598 | -0.342457 |
| 10            | 1             | 0           | 5.314485                | -3.980836 | -0.197241 |
| 11            | 1             | 0           | 6.733649                | -2.046331 | 0.337870  |
| 12            | 1             | 0           | 5.719338                | 0.182906  | 0.761127  |
| 13            | 1             | 0           | 2.789746                | 0.942820  | 1.686745  |
| 14            | 7             | 0           | 1.546711                | -1.302606 | 0.069207  |
| 15            | 6             | 0           | 0.272942                | 0.775863  | 0.266563  |
| 16            | 6             | 0           | 0.529397                | 2.041857  | -0.076716 |
| 17            | 6             | 0           | 2.949418                | 1.859393  | -0.180236 |
| 18            | 8             | 0           | 4.002577                | 2.272248  | -0.584509 |
| 19            | 8             | 0           | 1.828112                | 2.549017  | -0.417158 |
| 20            | 6             | 0           | -2.274264               | -1.787846 | 0.143537  |
| 21            | 7             | 0           | -2.083778               | -0.691900 | 0.869039  |
| 22            | 1             | 0           | -1.190180               | -0.111492 | 0.668836  |
| 23            | 7             | 0           | -1.218355               | -2.334166 | -0.470021 |

|    |   |   |           |           |           |
|----|---|---|-----------|-----------|-----------|
| 24 | 7 | 0 | -3.486499 | -2.346311 | 0.023707  |
| 25 | 6 | 0 | -3.178267 | -0.064568 | 1.585626  |
| 26 | 6 | 0 | -4.694741 | -1.688390 | 0.521589  |
| 27 | 6 | 0 | -4.458953 | -0.213362 | 0.783713  |
| 28 | 6 | 0 | -3.697370 | -3.637165 | -0.629984 |
| 29 | 6 | 0 | -1.330589 | -3.509153 | -1.315467 |
| 30 | 6 | 0 | -2.403780 | -4.418754 | -0.747216 |
| 31 | 1 | 0 | -0.358870 | -3.999751 | -1.329939 |
| 32 | 1 | 0 | -1.579758 | -3.224458 | -2.341979 |
| 33 | 1 | 0 | -2.091322 | -4.775913 | 0.235533  |
| 34 | 1 | 0 | -2.560689 | -5.281735 | -1.392358 |
| 35 | 1 | 0 | -4.428884 | -4.187469 | -0.035369 |
| 36 | 1 | 0 | -4.134801 | -3.465341 | -1.617970 |
| 37 | 1 | 0 | -5.472764 | -1.828595 | -0.230839 |
| 38 | 1 | 0 | -5.020704 | -2.194477 | 1.435102  |
| 39 | 1 | 0 | -5.310807 | 0.199000  | 1.322540  |
| 40 | 1 | 0 | -4.359351 | 0.323389  | -0.162533 |
| 41 | 1 | 0 | -3.299438 | -0.520036 | 2.572908  |
| 42 | 1 | 0 | -2.914627 | 0.982788  | 1.735338  |
| 43 | 1 | 0 | -0.288509 | -1.961532 | -0.263005 |
| 44 | 6 | 0 | -0.458162 | 3.127448  | -0.220802 |
| 45 | 6 | 0 | -1.814375 | 2.806313  | -0.338822 |
| 46 | 6 | 0 | -0.089484 | 4.474155  | -0.225787 |
| 47 | 6 | 0 | -2.774104 | 3.799620  | -0.429910 |
| 48 | 1 | 0 | -2.099929 | 1.762682  | -0.376686 |
| 49 | 6 | 0 | -1.054136 | 5.469627  | -0.319153 |
| 50 | 1 | 0 | 0.954760  | 4.743021  | -0.147435 |
| 51 | 6 | 0 | -2.398383 | 5.139402  | -0.416920 |
| 52 | 1 | 0 | -3.818655 | 3.529296  | -0.522943 |
| 53 | 1 | 0 | -0.750521 | 6.508977  | -0.314455 |
| 54 | 1 | 0 | -3.147461 | 5.916996  | -0.493253 |

---

TS-S3

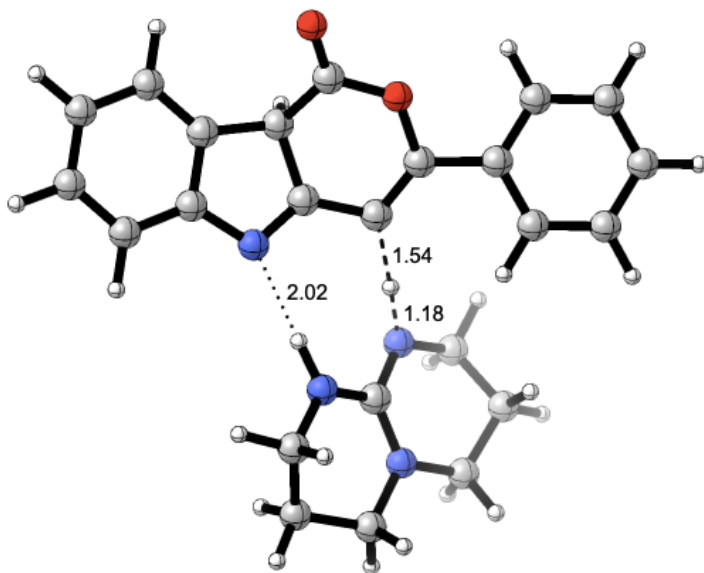

Calculated using M06-2X/def2TZVP in acetonitrile at 373.15 K:

HF = -1298.4018223 hartrees  
 Zero-point correction= 0.442501 (Hartree/Particle)  
 Thermal correction to Gibbs Free Energy= 0.363881  
 Sum of electronic and zero-point Energies= -1297.959321  
 Sum of electronic and thermal Enthalpies= -1297.920872  
 Sum of electronic and thermal Free Energies= -1298.037942

Standard orientation:

| Center Number | Atomic Number | Atomic Type | Coordinates (Angstroms) |           |           |
|---------------|---------------|-------------|-------------------------|-----------|-----------|
|               |               |             | X                       | Y         | Z         |
| 1             | 6             | 0           | 3.781516                | -0.335652 | 0.400787  |
| 2             | 6             | 0           | 3.047157                | -1.500086 | 0.132670  |
| 3             | 6             | 0           | 3.684191                | -2.712475 | -0.074638 |
| 4             | 6             | 0           | 5.074720                | -2.737864 | -0.011195 |
| 5             | 6             | 0           | 5.804805                | -1.583674 | 0.255684  |
| 6             | 6             | 0           | 5.158715                | -0.366007 | 0.472657  |
| 7             | 6             | 0           | 2.766254                | 0.740797  | 0.611725  |
| 8             | 6             | 0           | 1.477351                | 0.005672  | 0.321039  |
| 9             | 1             | 0           | 3.113266                | -3.608331 | -0.282633 |
| 10            | 1             | 0           | 5.596979                | -3.672091 | -0.173738 |
| 11            | 1             | 0           | 6.885177                | -1.630960 | 0.294829  |
| 12            | 1             | 0           | 5.725303                | 0.531693  | 0.684107  |
| 13            | 1             | 0           | 2.749133                | 1.076703  | 1.657910  |
| 14            | 7             | 0           | 1.656204                | -1.257759 | 0.091015  |
| 15            | 6             | 0           | 0.243038                | 0.731514  | 0.255251  |
| 16            | 6             | 0           | 0.401675                | 2.017248  | -0.079248 |
| 17            | 6             | 0           | 2.827279                | 2.006660  | -0.202771 |
| 18            | 8             | 0           | 3.835395                | 2.497158  | -0.629044 |
| 19            | 8             | 0           | 1.651597                | 2.622111  | -0.403268 |
| 20            | 6             | 0           | -2.146903               | -1.858603 | 0.163283  |
| 21            | 7             | 0           | -1.941810               | -0.766894 | 0.878425  |
| 22            | 7             | 0           | -1.096921               | -2.407168 | -0.471383 |

|    |   |   |           |           |           |
|----|---|---|-----------|-----------|-----------|
| 23 | 7 | 0 | -3.358781 | -2.432274 | 0.052274  |
| 24 | 6 | 0 | -3.034346 | -0.163815 | 1.615772  |
| 25 | 6 | 0 | -4.564212 | -1.785446 | 0.567109  |
| 26 | 6 | 0 | -4.331540 | -0.311546 | 0.838813  |
| 27 | 6 | 0 | -3.571844 | -3.720703 | -0.602930 |
| 28 | 6 | 0 | -1.220366 | -3.569286 | -1.330461 |
| 29 | 6 | 0 | -2.275808 | -4.492988 | -0.751654 |
| 30 | 1 | 0 | -0.247221 | -4.055331 | -1.375347 |
| 31 | 1 | 0 | -1.495389 | -3.274306 | -2.348030 |
| 32 | 1 | 0 | -1.941730 | -4.856987 | 0.221498  |
| 33 | 1 | 0 | -2.439289 | -5.351118 | -1.401909 |
| 34 | 1 | 0 | -4.287397 | -4.281489 | 0.001979  |
| 35 | 1 | 0 | -4.030092 | -3.549652 | -1.582124 |
| 36 | 1 | 0 | -5.351135 | -1.923142 | -0.177111 |
| 37 | 1 | 0 | -4.879364 | -2.299311 | 1.480548  |
| 38 | 1 | 0 | -5.176174 | 0.092343  | 1.395854  |
| 39 | 1 | 0 | -4.253562 | 0.233292  | -0.105152 |
| 40 | 1 | 0 | -3.138314 | -0.629871 | 2.601212  |
| 41 | 1 | 0 | -2.782385 | 0.886097  | 1.777013  |
| 42 | 1 | 0 | -0.170648 | -2.031762 | -0.269514 |
| 43 | 1 | 0 | -1.008587 | -0.093735 | 0.608403  |
| 44 | 6 | 0 | -0.671262 | 3.016752  | -0.227432 |
| 45 | 6 | 0 | -1.988091 | 2.587813  | -0.418691 |
| 46 | 6 | 0 | -0.415123 | 4.387545  | -0.164769 |
| 47 | 6 | 0 | -3.022738 | 3.502782  | -0.517280 |
| 48 | 1 | 0 | -2.184426 | 1.526653  | -0.508701 |
| 49 | 6 | 0 | -1.454539 | 5.303136  | -0.263432 |
| 50 | 1 | 0 | 0.598977  | 4.737036  | -0.029056 |
| 51 | 6 | 0 | -2.760701 | 4.866700  | -0.435865 |
| 52 | 1 | 0 | -4.036074 | 3.152457  | -0.669340 |
| 53 | 1 | 0 | -1.240823 | 6.362770  | -0.204714 |
| 54 | 1 | 0 | -3.568385 | 5.582711  | -0.516332 |

---

## IntS6

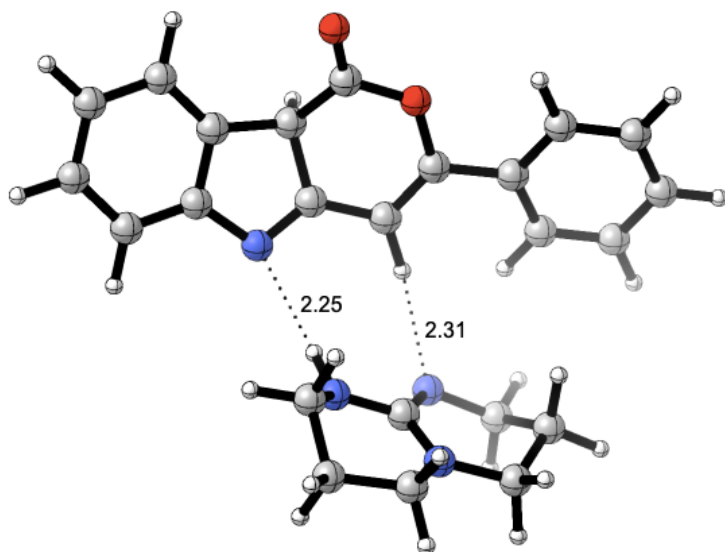

Calculated using M06-2X/def2TZVP in acetonitrile at 373.15 K:

HF = -1298.4293094 hartrees  
 Zero-point correction= 0.446815 (Hartree/Particle)  
 Thermal correction to Gibbs Free Energy= 0.364783  
 Sum of electronic and zero-point Energies= -1297.982495  
 Sum of electronic and thermal Enthalpies= -1297.943305  
 Sum of electronic and thermal Free Energies= -1298.064527

Standard orientation:

| Center Number | Atomic Number | Atomic Type | Coordinates (Angstroms) |           |           |
|---------------|---------------|-------------|-------------------------|-----------|-----------|
|               |               |             | X                       | Y         | Z         |
| 1             | 6             | 0           | -3.895104               | 0.317865  | -0.280275 |
| 2             | 6             | 0           | -3.399368               | -0.969616 | -0.529699 |
| 3             | 6             | 0           | -4.231583               | -2.075274 | -0.495837 |
| 4             | 6             | 0           | -5.574526               | -1.867005 | -0.195293 |
| 5             | 6             | 0           | -6.066628               | -0.590014 | 0.057844  |
| 6             | 6             | 0           | -5.227749               | 0.523493  | 0.008617  |
| 7             | 6             | 0           | -2.733351               | 1.236654  | -0.477373 |
| 8             | 6             | 0           | -1.611110               | 0.250454  | -0.677606 |
| 9             | 1             | 0           | -3.841751               | -3.065695 | -0.691609 |
| 10            | 1             | 0           | -6.247807               | -2.713499 | -0.155514 |
| 11            | 1             | 0           | -7.114195               | -0.458364 | 0.294419  |
| 12            | 1             | 0           | -5.613204               | 1.516787  | 0.197951  |
| 13            | 1             | 0           | -2.842156               | 1.784296  | -1.426967 |
| 14            | 7             | 0           | -2.003691               | -0.972444 | -0.766865 |
| 15            | 6             | 0           | -0.271343               | 0.757031  | -0.673759 |
| 16            | 6             | 0           | -0.064902               | 1.968538  | -0.127923 |
| 17            | 6             | 0           | -2.374088               | 2.293848  | 0.519865  |
| 18            | 8             | 0           | -3.116051               | 2.835517  | 1.277838  |
| 19            | 8             | 0           | -1.072318               | 2.701906  | 0.466958  |
| 20            | 6             | 0           | 1.941231                | -2.163240 | -0.474087 |
| 21            | 7             | 0           | 2.215627                | -1.392004 | -1.477592 |
| 22            | 7             | 0           | 0.638355                | -2.576671 | -0.311745 |
| 23            | 7             | 0           | 2.849263                | -2.650643 | 0.426233  |
| 24            | 6             | 0           | 3.616697                | -1.080878 | -1.697313 |

|    |   |   |           |           |           |
|----|---|---|-----------|-----------|-----------|
| 25 | 6 | 0 | 4.229252  | -2.178464 | 0.419723  |
| 26 | 6 | 0 | 4.366208  | -0.902212 | -0.386690 |
| 27 | 6 | 0 | 2.504798  | -3.475024 | 1.579089  |
| 28 | 6 | 0 | 0.157302  | -3.071985 | 0.961913  |
| 29 | 6 | 0 | 1.139602  | -4.120124 | 1.445203  |
| 30 | 1 | 0 | -0.834227 | -3.495297 | 0.805999  |
| 31 | 1 | 0 | 0.065342  | -2.270838 | 1.707534  |
| 32 | 1 | 0 | 1.174964  | -4.935118 | 0.719949  |
| 33 | 1 | 0 | 0.837348  | -4.529746 | 2.408571  |
| 34 | 1 | 0 | 3.280795  | -4.236946 | 1.690071  |
| 35 | 1 | 0 | 2.533438  | -2.852950 | 2.482224  |
| 36 | 1 | 0 | 4.529659  | -2.012335 | 1.457679  |
| 37 | 1 | 0 | 4.880934  | -2.960235 | 0.014451  |
| 38 | 1 | 0 | 5.421151  | -0.680779 | -0.552087 |
| 39 | 1 | 0 | 3.925332  | -0.067907 | 0.164843  |
| 40 | 1 | 0 | 4.101767  | -1.875813 | -2.280688 |
| 41 | 1 | 0 | 3.682080  | -0.174507 | -2.303909 |
| 42 | 1 | 0 | -0.032381 | -2.062367 | -0.865634 |
| 43 | 1 | 0 | 0.559668  | 0.154098  | -1.022730 |
| 44 | 6 | 0 | 1.238220  | 2.637604  | -0.011054 |
| 45 | 6 | 0 | 2.331967  | 2.167527  | -0.743424 |
| 46 | 6 | 0 | 1.403486  | 3.737107  | 0.832229  |
| 47 | 6 | 0 | 3.566643  | 2.781541  | -0.624749 |
| 48 | 1 | 0 | 2.215744  | 1.322207  | -1.410066 |
| 49 | 6 | 0 | 2.643743  | 4.348098  | 0.946992  |
| 50 | 1 | 0 | 0.563594  | 4.108444  | 1.401799  |
| 51 | 6 | 0 | 3.727501  | 3.872843  | 0.222194  |
| 52 | 1 | 0 | 4.406674  | 2.408634  | -1.197251 |
| 53 | 1 | 0 | 2.761865  | 5.197014  | 1.607565  |
| 54 | 1 | 0 | 4.694058  | 4.351255  | 0.313294  |

---

IntS7

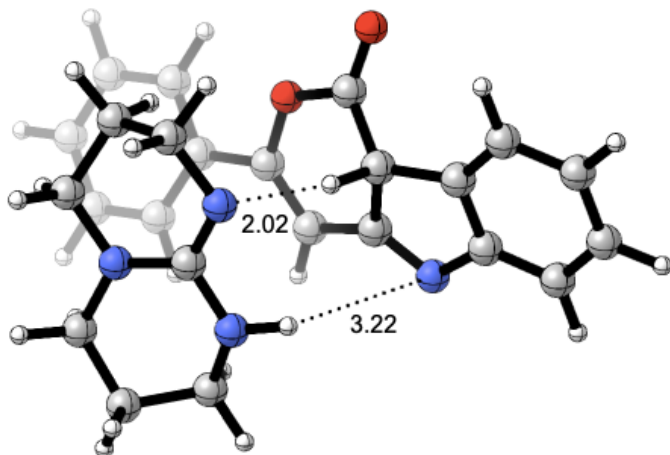

Calculated using M06-2X/def2TZVP in acetonitrile at 373.15 K:

HF = -1298.4339656 hartrees  
 Zero-point correction= 0.446622 (Hartree/Particle)  
 Thermal correction to Gibbs Free Energy= 0.367720  
 Sum of electronic and zero-point Energies= -1297.987344  
 Sum of electronic and thermal Enthalpies= -1297.948240  
 Sum of electronic and thermal Free Energies= -1298.066246

Standard orientation:

| Center Number | Atomic Number | Atomic Type | Coordinates (Angstroms) |           |           |
|---------------|---------------|-------------|-------------------------|-----------|-----------|
|               |               |             | X                       | Y         | Z         |
| 1             | 6             | 0           | -3.446001               | -0.408853 | 0.143883  |
| 2             | 6             | 0           | -3.673437               | 0.172168  | -1.114112 |
| 3             | 6             | 0           | -4.947541               | 0.553497  | -1.504099 |
| 4             | 6             | 0           | -5.994340               | 0.326624  | -0.616791 |
| 5             | 6             | 0           | -5.770932               | -0.259344 | 0.627007  |
| 6             | 6             | 0           | -4.486311               | -0.626167 | 1.024965  |
| 7             | 6             | 0           | -1.973107               | -0.593103 | 0.229468  |
| 8             | 6             | 0           | -1.543295               | -0.210588 | -1.156293 |
| 9             | 1             | 0           | -5.114963               | 1.007123  | -2.472385 |
| 10            | 1             | 0           | -7.001078               | 0.607984  | -0.897997 |
| 11            | 1             | 0           | -6.605432               | -0.429671 | 1.294557  |
| 12            | 1             | 0           | -4.313181               | -1.072970 | 1.995375  |
| 13            | 1             | 0           | -1.497208               | 0.178643  | 0.892827  |
| 14            | 7             | 0           | -2.490719               | 0.277315  | -1.882315 |
| 15            | 6             | 0           | -0.171002               | -0.439741 | -1.499007 |
| 16            | 6             | 0           | 0.547274                | -1.254056 | -0.705234 |
| 17            | 6             | 0           | -1.324041               | -1.838591 | 0.711725  |
| 18            | 8             | 0           | -1.786856               | -2.665628 | 1.435732  |
| 19            | 8             | 0           | -0.011431               | -1.961548 | 0.335672  |
| 20            | 6             | 0           | 0.750230                | 1.795729  | 0.914679  |
| 21            | 7             | 0           | 0.012449                | 1.179349  | 1.783448  |
| 22            | 7             | 0           | 0.121546                | 2.531839  | -0.057726 |
| 23            | 7             | 0           | 2.113564                | 1.800267  | 0.891118  |
| 24            | 6             | 0           | 0.698174                | 0.541102  | 2.893549  |
| 25            | 6             | 0           | 2.883920                | 0.961755  | 1.800492  |
| 26            | 6             | 0           | 2.014839                | -0.088833 | 2.465884  |
| 27            | 6             | 0           | 2.926158                | 2.610000  | -0.008805 |

|    |   |   |           |           |           |
|----|---|---|-----------|-----------|-----------|
| 28 | 6 | 0 | 0.816041  | 3.026527  | -1.225380 |
| 29 | 6 | 0 | 2.113232  | 3.654506  | -0.751154 |
| 30 | 1 | 0 | 0.179319  | 3.759546  | -1.717527 |
| 31 | 1 | 0 | 1.026928  | 2.228925  | -1.949722 |
| 32 | 1 | 0 | 1.877806  | 4.491488  | -0.091767 |
| 33 | 1 | 0 | 2.694592  | 4.033297  | -1.590993 |
| 34 | 1 | 0 | 3.710120  | 3.089296  | 0.584565  |
| 35 | 1 | 0 | 3.429018  | 1.945632  | -0.721325 |
| 36 | 1 | 0 | 3.680031  | 0.485190  | 1.218201  |
| 37 | 1 | 0 | 3.364139  | 1.598566  | 2.551996  |
| 38 | 1 | 0 | 2.547062  | -0.513852 | 3.317631  |
| 39 | 1 | 0 | 1.810727  | -0.898019 | 1.764541  |
| 40 | 1 | 0 | 0.887335  | 1.271006  | 3.692180  |
| 41 | 1 | 0 | 0.036487  | -0.218078 | 3.316201  |
| 42 | 1 | 0 | -0.877956 | 2.412897  | -0.086911 |
| 43 | 1 | 0 | 0.260865  | -0.017920 | -2.393335 |
| 44 | 6 | 0 | 1.977637  | -1.553237 | -0.862859 |
| 45 | 6 | 0 | 2.534105  | -2.703554 | -0.301478 |
| 46 | 6 | 0 | 2.801889  | -0.668360 | -1.560410 |
| 47 | 6 | 0 | 3.887761  | -2.966485 | -0.448867 |
| 48 | 1 | 0 | 1.905415  | -3.389280 | 0.249401  |
| 49 | 6 | 0 | 4.153340  | -0.933881 | -1.704363 |
| 50 | 1 | 0 | 2.389327  | 0.241307  | -1.976930 |
| 51 | 6 | 0 | 4.700518  | -2.084723 | -1.148996 |
| 52 | 1 | 0 | 4.308546  | -3.863574 | -0.014108 |
| 53 | 1 | 0 | 4.782330  | -0.236368 | -2.242154 |
| 54 | 1 | 0 | 5.757527  | -2.289519 | -1.258060 |

---



TS-S4

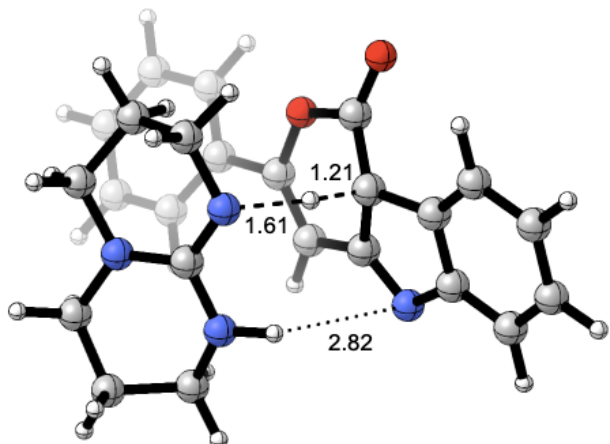

Calculated using M06-2X/def2TZVP in acetonitrile at 373.15 K:

```

HF = -1298.4333412 hartrees
Zero-point correction= 0.444083 (Hartree/Particle)
Thermal correction to Gibbs Free Energy= 0.369055
Sum of electronic and zero-point Energies= -1297.989258
Sum of electronic and thermal Enthalpies= -1297.951368
Sum of electronic and thermal Free Energies= -1298.064287
  
```

Standard orientation:

| Center Number | Atomic Number | Atomic Type | Coordinates (Angstroms) |           |           |
|---------------|---------------|-------------|-------------------------|-----------|-----------|
|               |               |             | X                       | Y         | Z         |
| 1             | 6             | 0           | -3.287575               | -0.583380 | 0.087968  |
| 2             | 6             | 0           | -3.517555               | 0.069232  | -1.138149 |
| 3             | 6             | 0           | -4.791604               | 0.497231  | -1.487959 |
| 4             | 6             | 0           | -5.831308               | 0.243468  | -0.602538 |
| 5             | 6             | 0           | -5.605743               | -0.414774 | 0.606969  |
| 6             | 6             | 0           | -4.327008               | -0.827602 | 0.968778  |
| 7             | 6             | 0           | -1.831271               | -0.799032 | 0.136784  |
| 8             | 6             | 0           | -1.401063               | -0.359248 | -1.212293 |
| 9             | 1             | 0           | -4.962543               | 1.005032  | -2.428485 |
| 10            | 1             | 0           | -6.835463               | 0.559019  | -0.855541 |
| 11            | 1             | 0           | -6.437005               | -0.603970 | 1.273739  |
| 12            | 1             | 0           | -4.151733               | -1.329821 | 1.911400  |
| 13            | 1             | 0           | -1.296526               | 0.051641  | 0.816436  |
| 14            | 7             | 0           | -2.344559               | 0.194288  | -1.908289 |
| 15            | 6             | 0           | -0.018297               | -0.538463 | -1.542792 |
| 16            | 6             | 0           | 0.719485                | -1.323143 | -0.736124 |
| 17            | 6             | 0           | -1.152441               | -1.991983 | 0.646205  |
| 18            | 8             | 0           | -1.577040               | -2.830165 | 1.387639  |
| 19            | 8             | 0           | 0.174703                | -2.066264 | 0.283269  |
| 20            | 6             | 0           | 0.441846                | 1.788984  | 0.827349  |
| 21            | 7             | 0           | -0.292759               | 1.034221  | 1.598966  |
| 22            | 7             | 0           | -0.176327               | 2.446855  | -0.194727 |
| 23            | 7             | 0           | 1.776746                | 1.980557  | 0.967230  |
| 24            | 6             | 0           | 0.341750                | 0.413530  | 2.749751  |
| 25            | 6             | 0           | 2.538361                | 1.261358  | 1.982069  |
| 26            | 6             | 0           | 1.790056                | 0.038181  | 2.474024  |
| 27            | 6             | 0           | 2.565053                | 2.914080  | 0.168024  |

|    |   |   |           |           |           |
|----|---|---|-----------|-----------|-----------|
| 28 | 6 | 0 | 0.561187  | 3.078516  | -1.268121 |
| 29 | 6 | 0 | 1.699526  | 3.861101  | -0.641341 |
| 30 | 1 | 0 | -0.118508 | 3.733360  | -1.809732 |
| 31 | 1 | 0 | 0.954111  | 2.341303  | -1.979706 |
| 32 | 1 | 0 | 1.281390  | 4.634917  | 0.004343  |
| 33 | 1 | 0 | 2.308280  | 4.343760  | -1.404561 |
| 34 | 1 | 0 | 3.209351  | 3.475682  | 0.849338  |
| 35 | 1 | 0 | 3.222375  | 2.338311  | -0.493331 |
| 36 | 1 | 0 | 3.491509  | 0.971738  | 1.530627  |
| 37 | 1 | 0 | 2.760447  | 1.941377  | 2.811535  |
| 38 | 1 | 0 | 2.271770  | -0.345200 | 3.373669  |
| 39 | 1 | 0 | 1.827942  | -0.746706 | 1.716656  |
| 40 | 1 | 0 | 0.296491  | 1.087362  | 3.613721  |
| 41 | 1 | 0 | -0.236119 | -0.474846 | 3.016811  |
| 42 | 1 | 0 | -1.144627 | 2.206973  | -0.335088 |
| 43 | 1 | 0 | 0.422315  | -0.072569 | -2.411088 |
| 44 | 6 | 0 | 2.172031  | -1.523282 | -0.841400 |
| 45 | 6 | 0 | 2.771250  | -2.683631 | -0.350474 |
| 46 | 6 | 0 | 2.970678  | -0.526272 | -1.403928 |
| 47 | 6 | 0 | 4.145104  | -2.848565 | -0.440569 |
| 48 | 1 | 0 | 2.159097  | -3.453974 | 0.098001  |
| 49 | 6 | 0 | 4.343184  | -0.693763 | -1.489609 |
| 50 | 1 | 0 | 2.516609  | 0.392465  | -1.753620 |
| 51 | 6 | 0 | 4.933838  | -1.856771 | -1.009378 |
| 52 | 1 | 0 | 4.600875  | -3.754234 | -0.062363 |
| 53 | 1 | 0 | 4.953482  | 0.089449  | -1.920197 |
| 54 | 1 | 0 | 6.006565  | -1.985723 | -1.071557 |

---

## I. References

- (1) Z. Xin, C. Lescot, S. D. Friis, K. Daasbjerg and T. Skrydstrup, *Angew. Chem. Int. Ed.*, 2015, **54**, 6862.
- (2) Gaussian 09, Revision A.02, M. J. Frisch, G. W. Trucks, H. B. Schlegel, G. E. Scuseria, M. A. Robb, J. R. Cheeseman, G. Scalmani, V. Barone, G. A. Petersson, H. Nakatsuji, X. Li, M. Caricato, A. Marenich, J. Bloino, B. G. Janesko, R. Gomperts, B. Mennucci, H. P. Hratchian, J. V. Ortiz, A. F. Izmaylov, J. L. Sonnenberg, D. Williams-Young, F. Ding, F. Lipparini, F. Egidi, J. Goings, B. Peng, A. Petrone, T. Henderson, D. Ranasinghe, V. G. Zakrzewski, J. Gao, N. Rega, G. Zheng, W. Liang, M. Hada, M. Ehara, K. Toyota, R. Fukuda, J. Hasegawa, M. Ishida, T. Nakajima, Y. Honda, O. Kitao, H. Nakai, T. Vreven, K. Throssell, J. A. Montgomery, Jr., J. E. Peralta, F. Ogliaro, M. Bearpark, J. J. Heyd, E. Brothers, K. N. Kudin, V. N. Staroverov, T. Keith, R. Kobayashi, J. Normand, K. Raghavachari, A. Rendell, J. C. Burant, S. S. Iyengar, J. Tomasi, M. Cossi, J. M. Millam, M. Klene, C. Adamo, R. Cammi, J. W. Ochterski, R. L. Martin, K. Morokuma, O. Farkas, J. B. Foresman and D. J. Fox, Gaussian, Inc., Wallingford CT, 2016.
- (3) B. Mennucci, R. Cammi and J. Tomasi, *J. Chem. Phys.*, 1998, **109**, 2798.
- (4) Y. Zhao and D. G. Truhlar, *Theor. Chem. Acc.*, 2008, **120**, 215.
- (5) Weigend, F. *Phys. Chem. Chem. Phys.*, 2006, **8**, 1057.
- (6) CYLview, 1.0b; C. Y. Legault, Université de Sherbrooke, 2009 ([www.cylview.org](http://www.cylview.org)).
- (7) Contreras-García, E. R. Johnson, S. Keinan, R. Chaudret, J. P. Piquemal, D. N. Beratan and W. Yang, *J. Chem. Theory Comput.*, 2011, **7**, 625.
- (8) W. Humphrey, A. Dalke and K. Schulten, *J. Molec. Graphics*, 1996, **14**, 33.
- (9) Y. Q. Fang and M. Lautens, *J. Org. Chem.*, 2008, **73**, 538.
- (10) M. Nagamochi, Y. Q. Fang and M. Lautens, *Org. Lett.*, 2007, **9**, 2955.
- (11) C. Li, J. Jiang, L. Li, L. Zhang, Q. Chen, M. Wang, C. Fu and L. Zhang, *Tetrahedron Lett.*, 2020, **61**, 152449.
- (12) K. Hoshi, T. Chiba, J. Sato, Y. Hayashi, Y. Takahashi, H. Ebe, S. Ohisa and J. Kido, *ACS Appl. Mater. Interfaces*, 2018, **10**, 24607.
